# Supplementary material
Source: bioRxiv or medRxiv preprint supplement (https://www.biorxiv.org/highwire/filestream/23330/field_highwire_adjunct_files/15/083931-9.pdf)

Figure S9.1

*H. cydno*

Split reads only

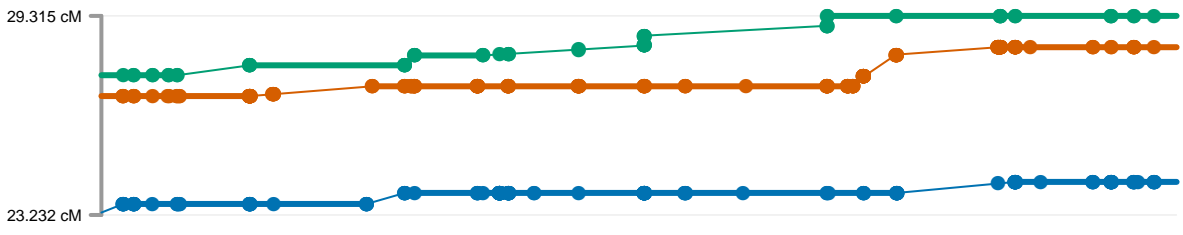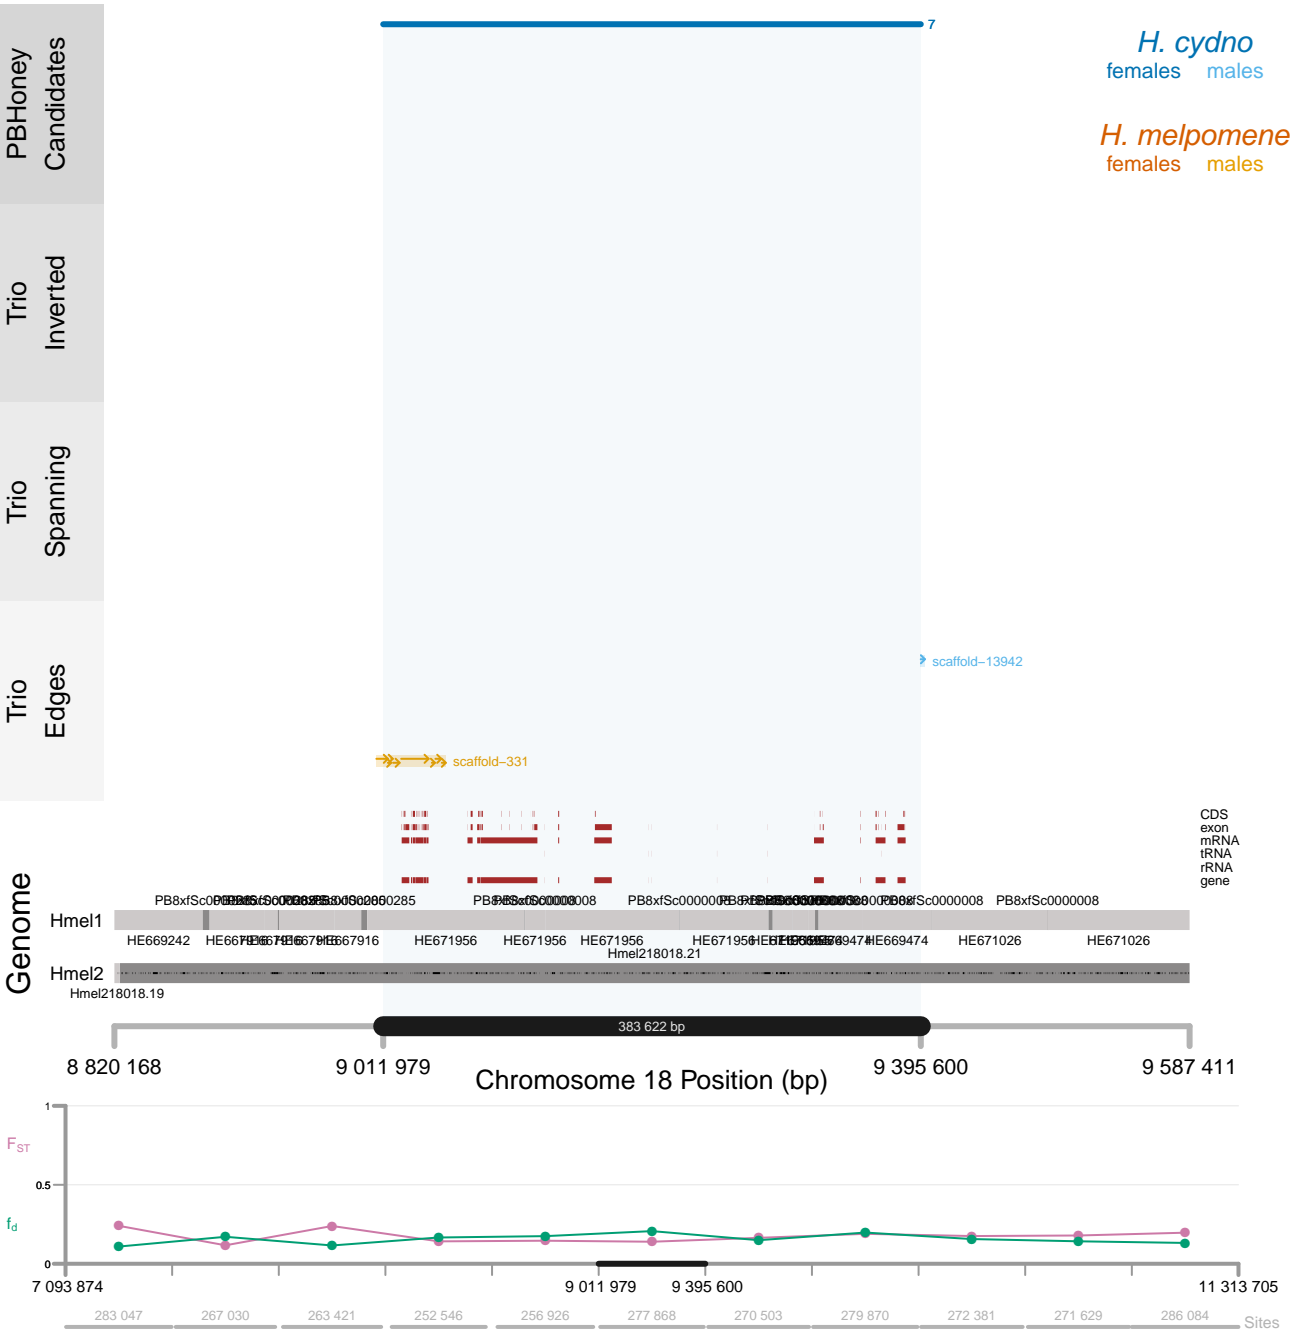

Figure S9.2

*H. cydno*

Split reads only

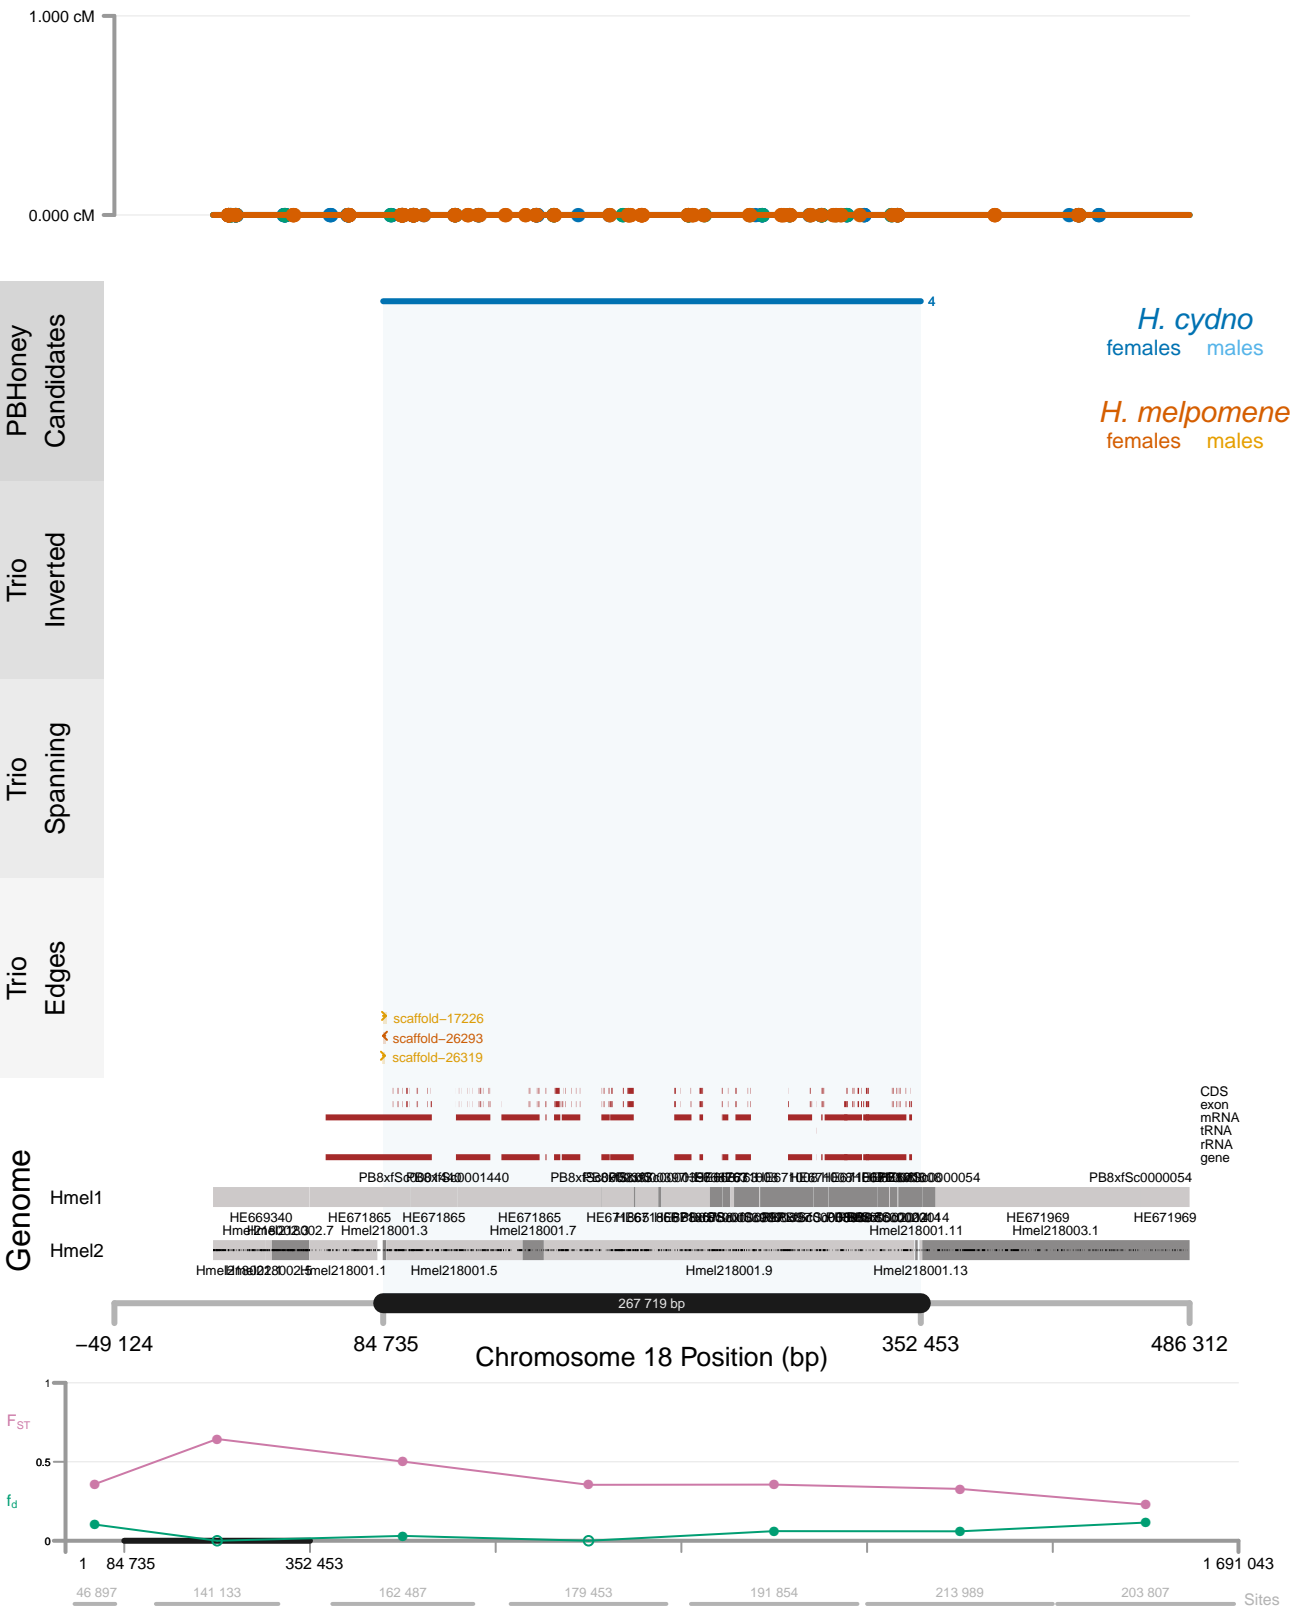

Figure S9.3

*H. cydno*

Split reads only

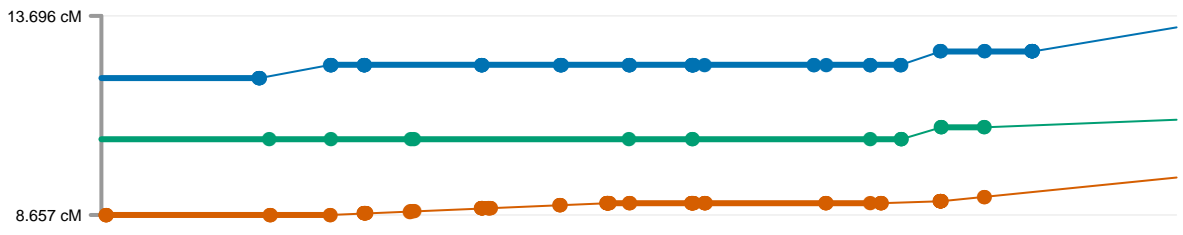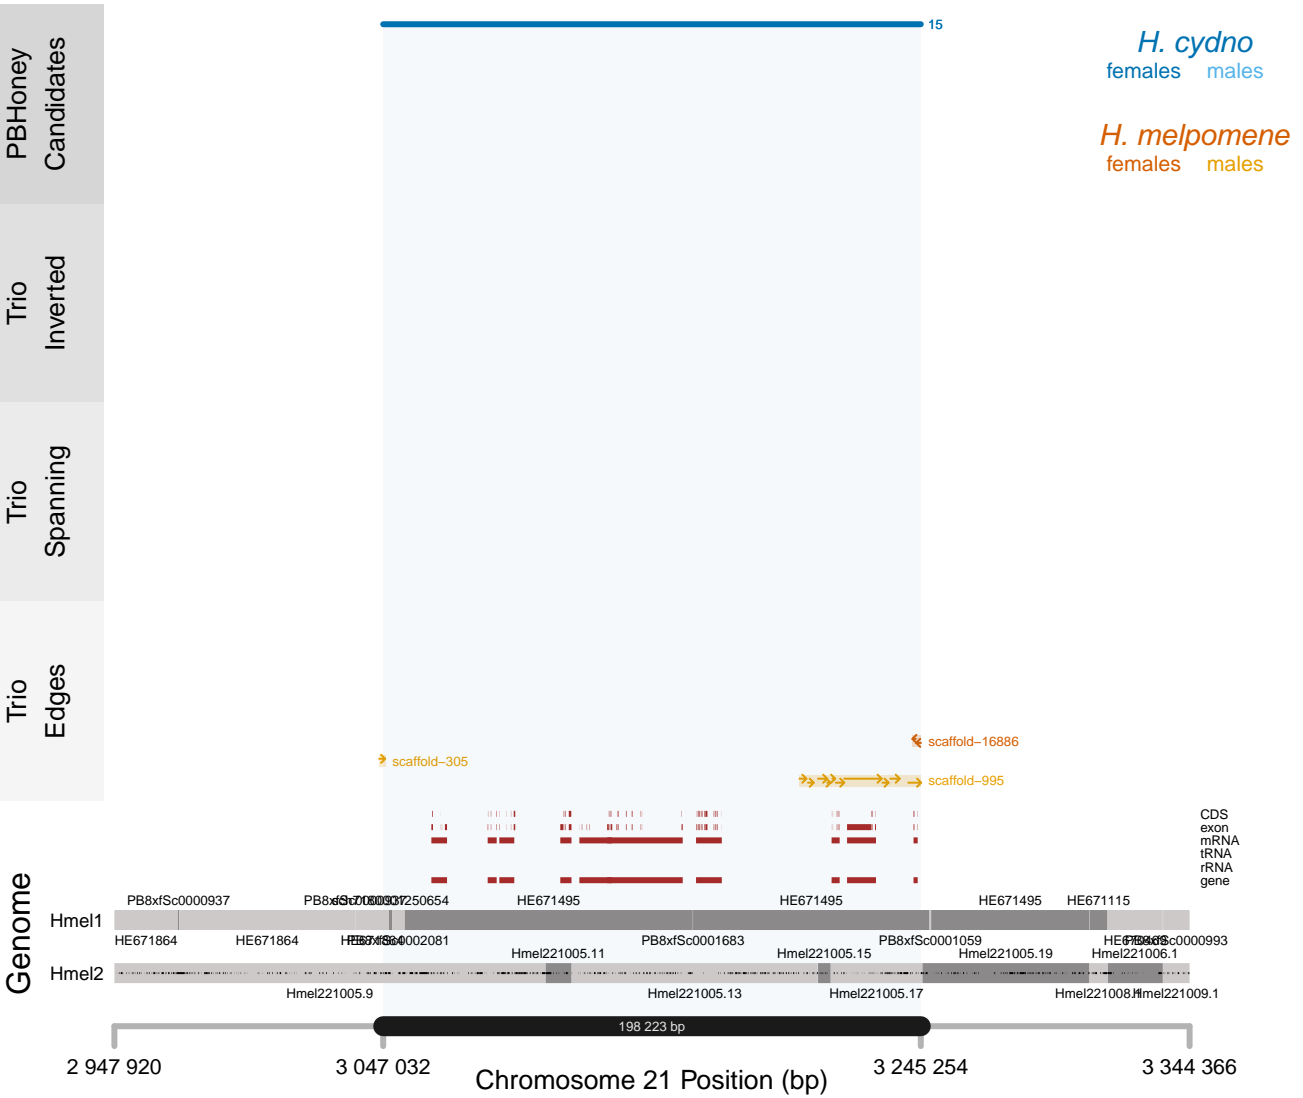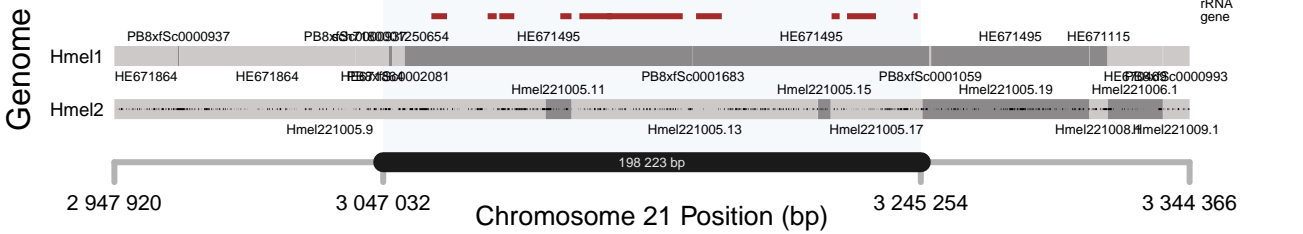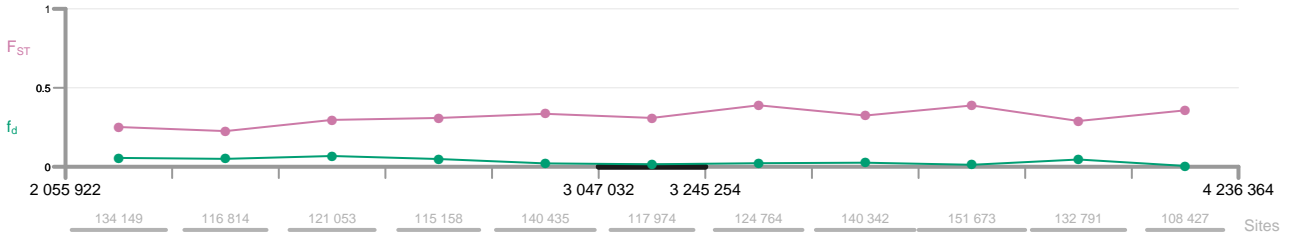

Figure S9.4

*H. cydno*

Split reads only

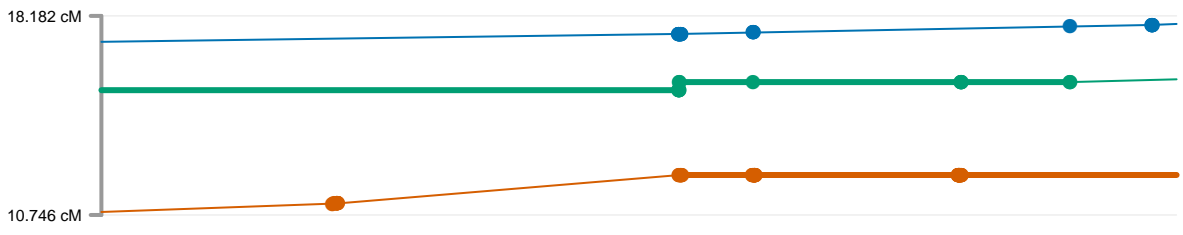

PBHoney Candidates  
Trio Inverted  
Trio Spanning  
Trio Edges

*H. cydno*  
females males  
*H. melpomene*  
females males

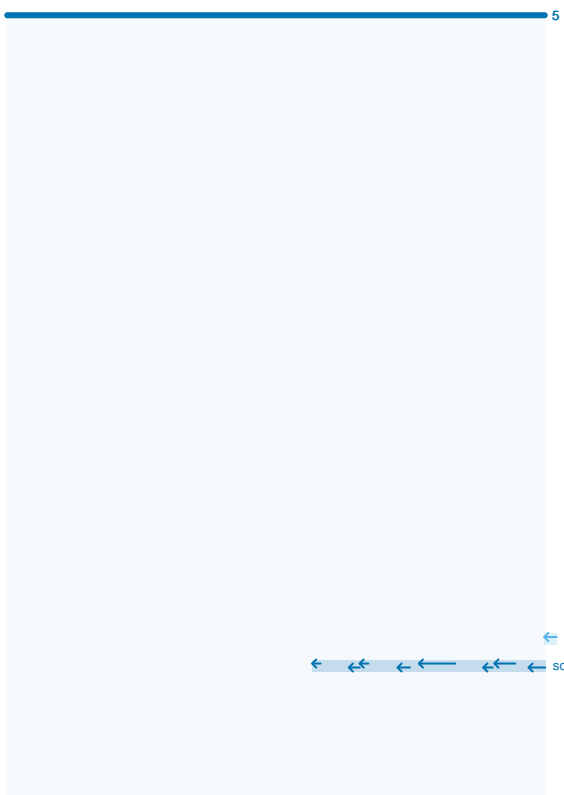

Genome

CDS  
exon  
mRNA  
tRNA  
rRNA  
gene

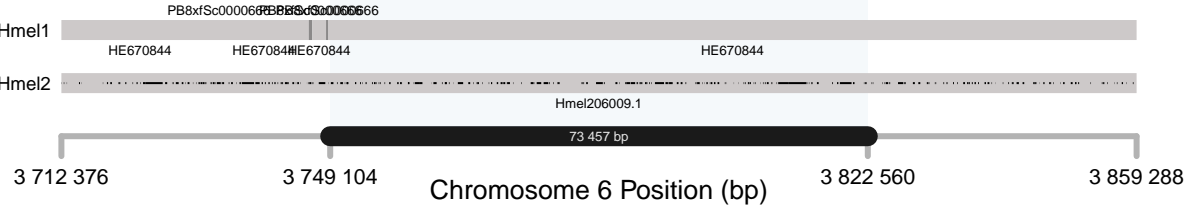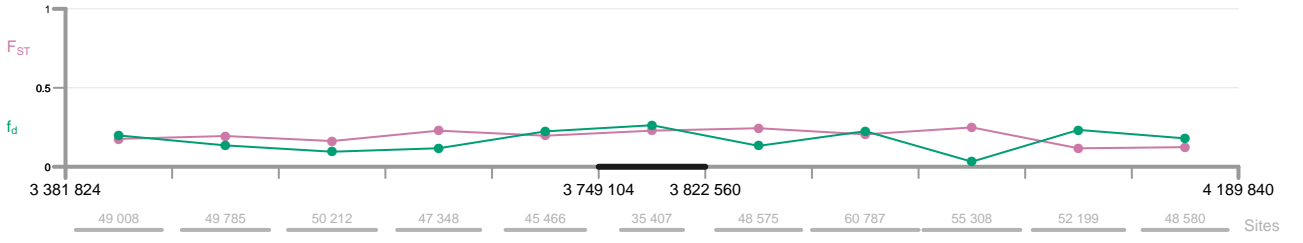

Figure S9.5

*H. cydno*

Split reads only

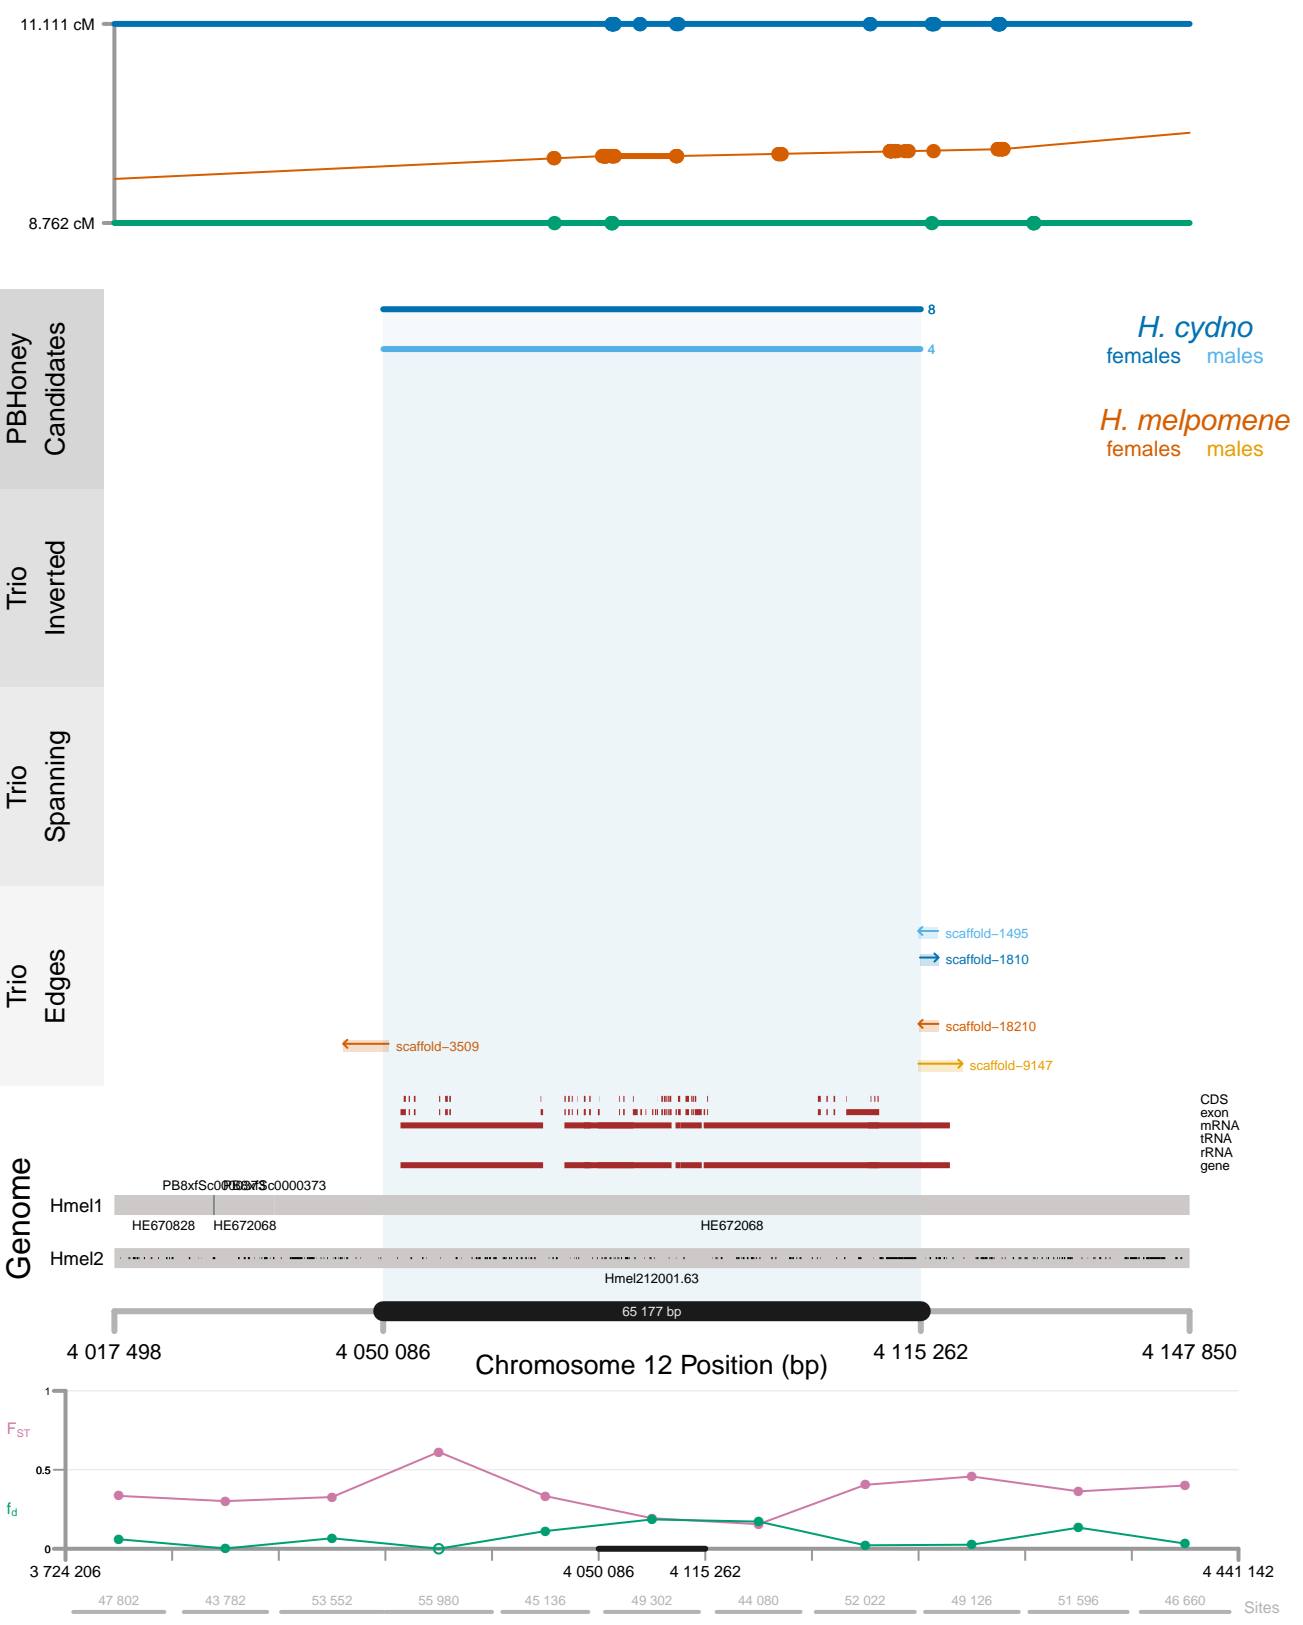

PBHoney Candidates  
Trio Inverted  
Trio Spanning  
Trio Edges

*H. cydno*  
females males  
*H. melpomene*  
females males

Genome

CDS  
exon  
mRNA  
tRNA  
rRNA  
gene

Chromosome 12 Position (bp)

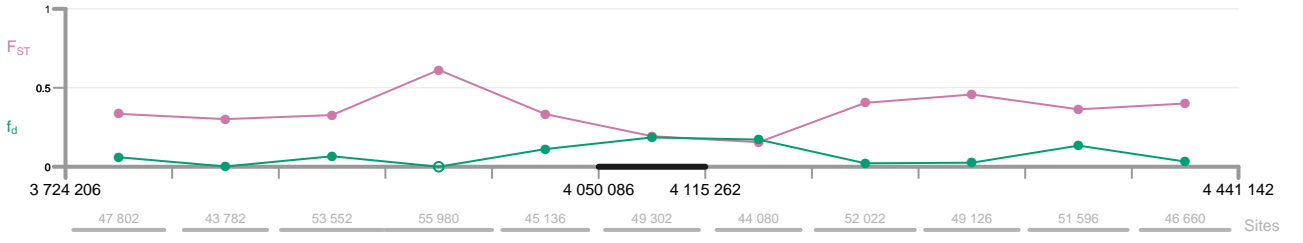

Figure S9.6

*H. cydno*

Split reads only

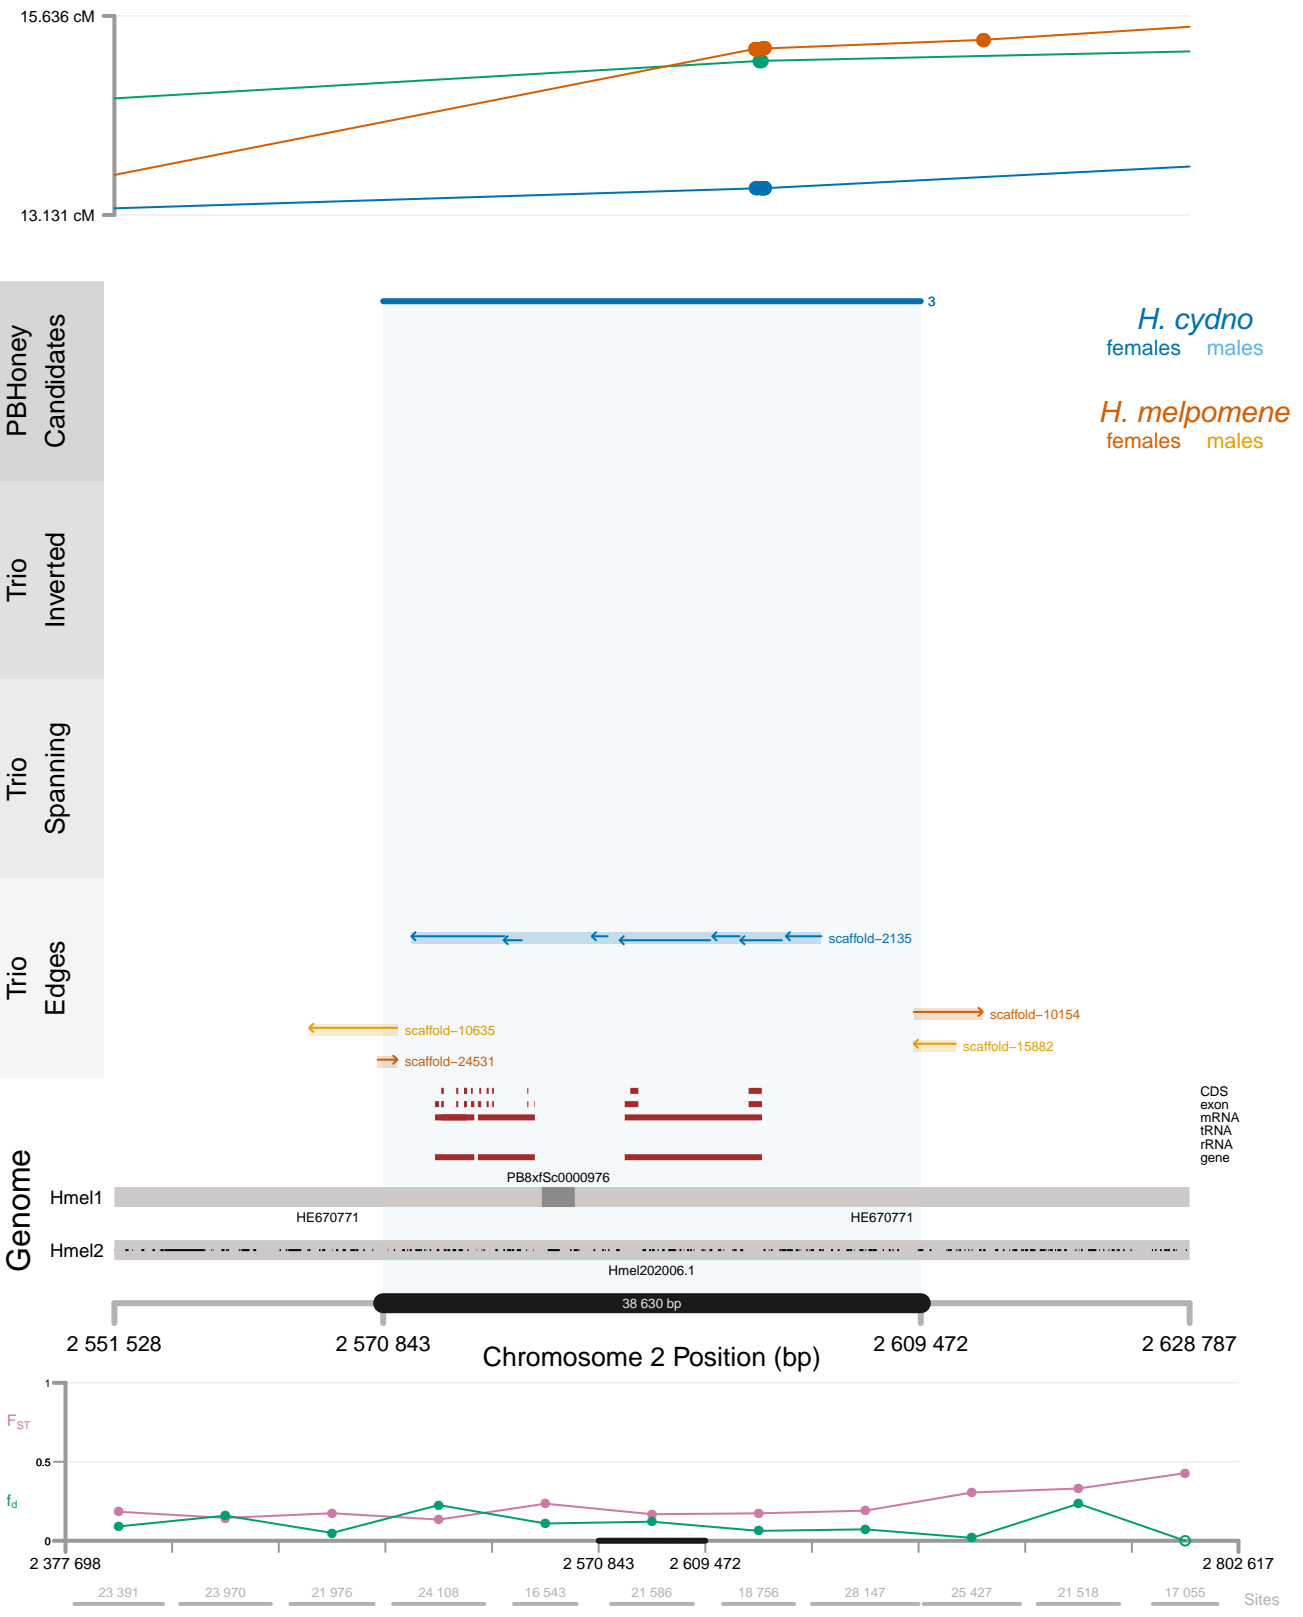

Figure S9.7

*H. cydno*

Split reads only

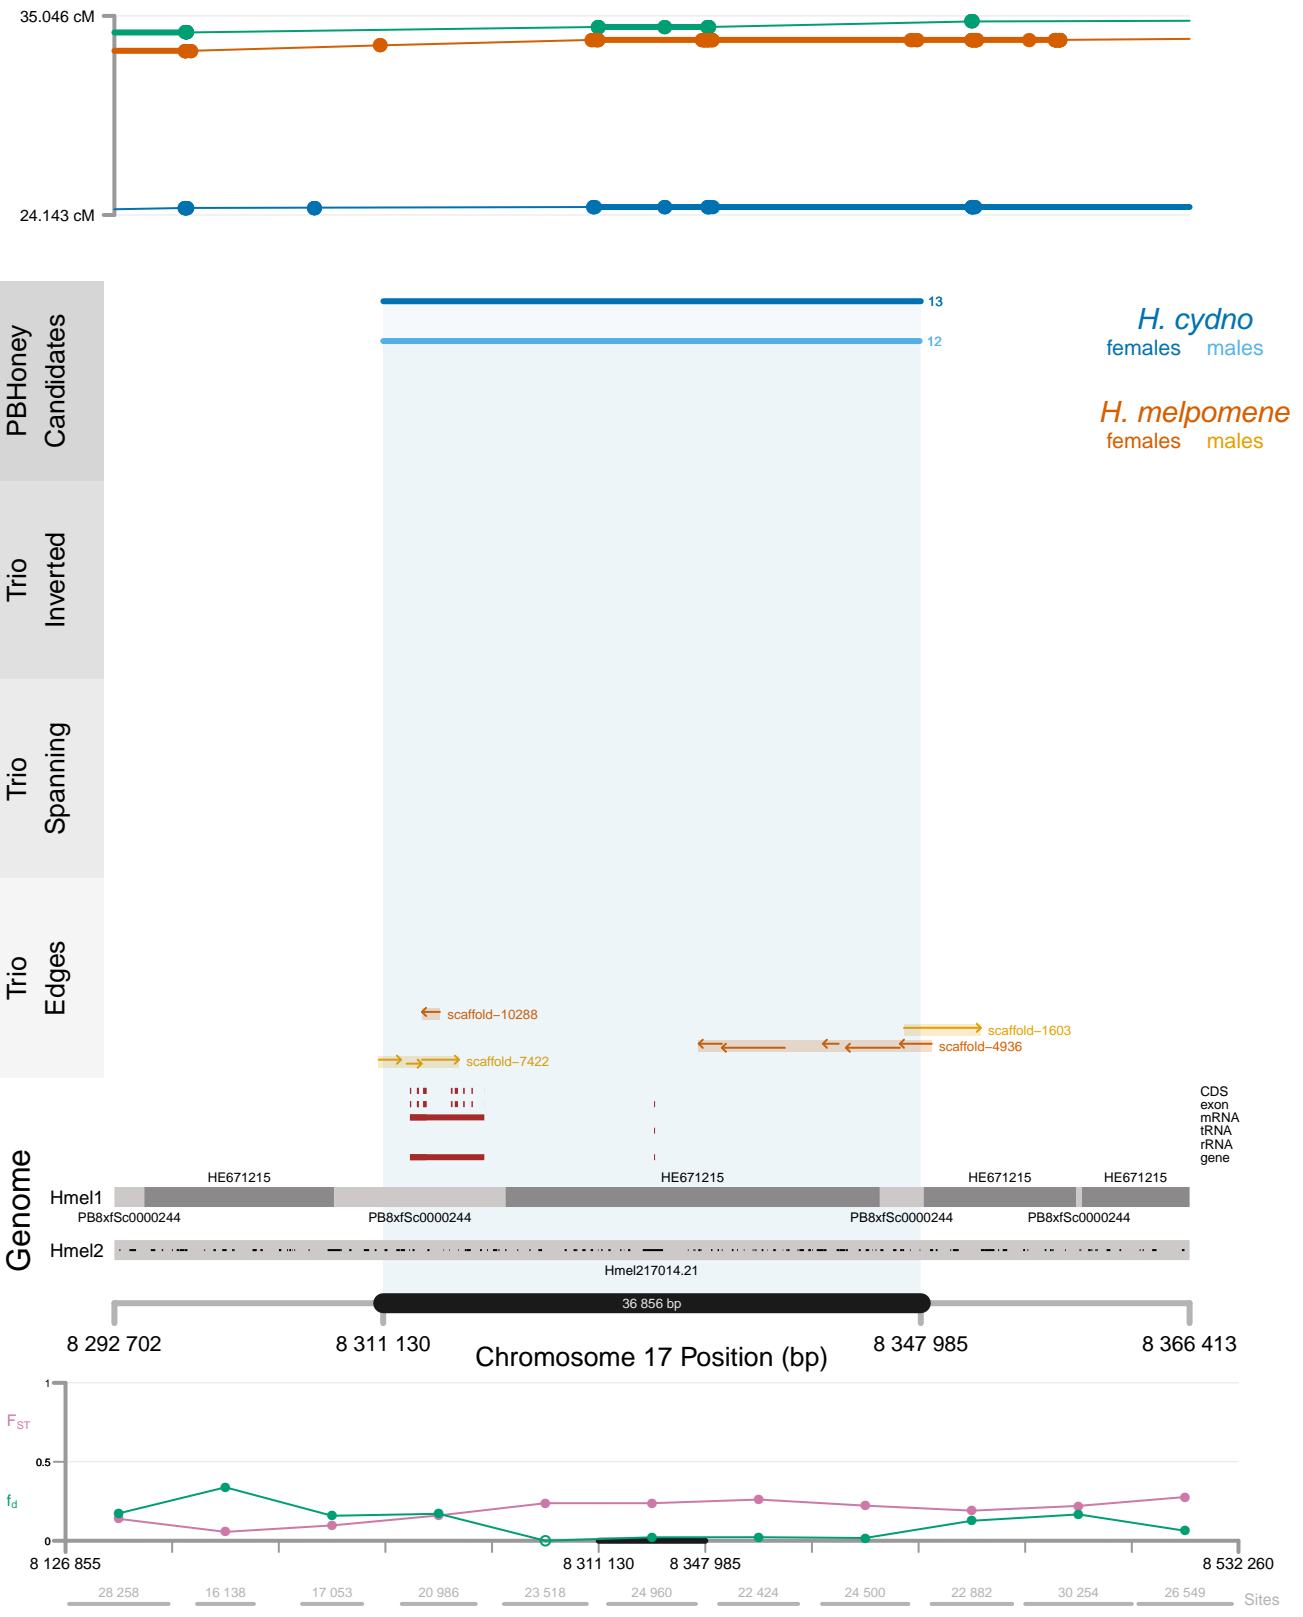

Figure S9.8

*H. cydno*

Split reads only

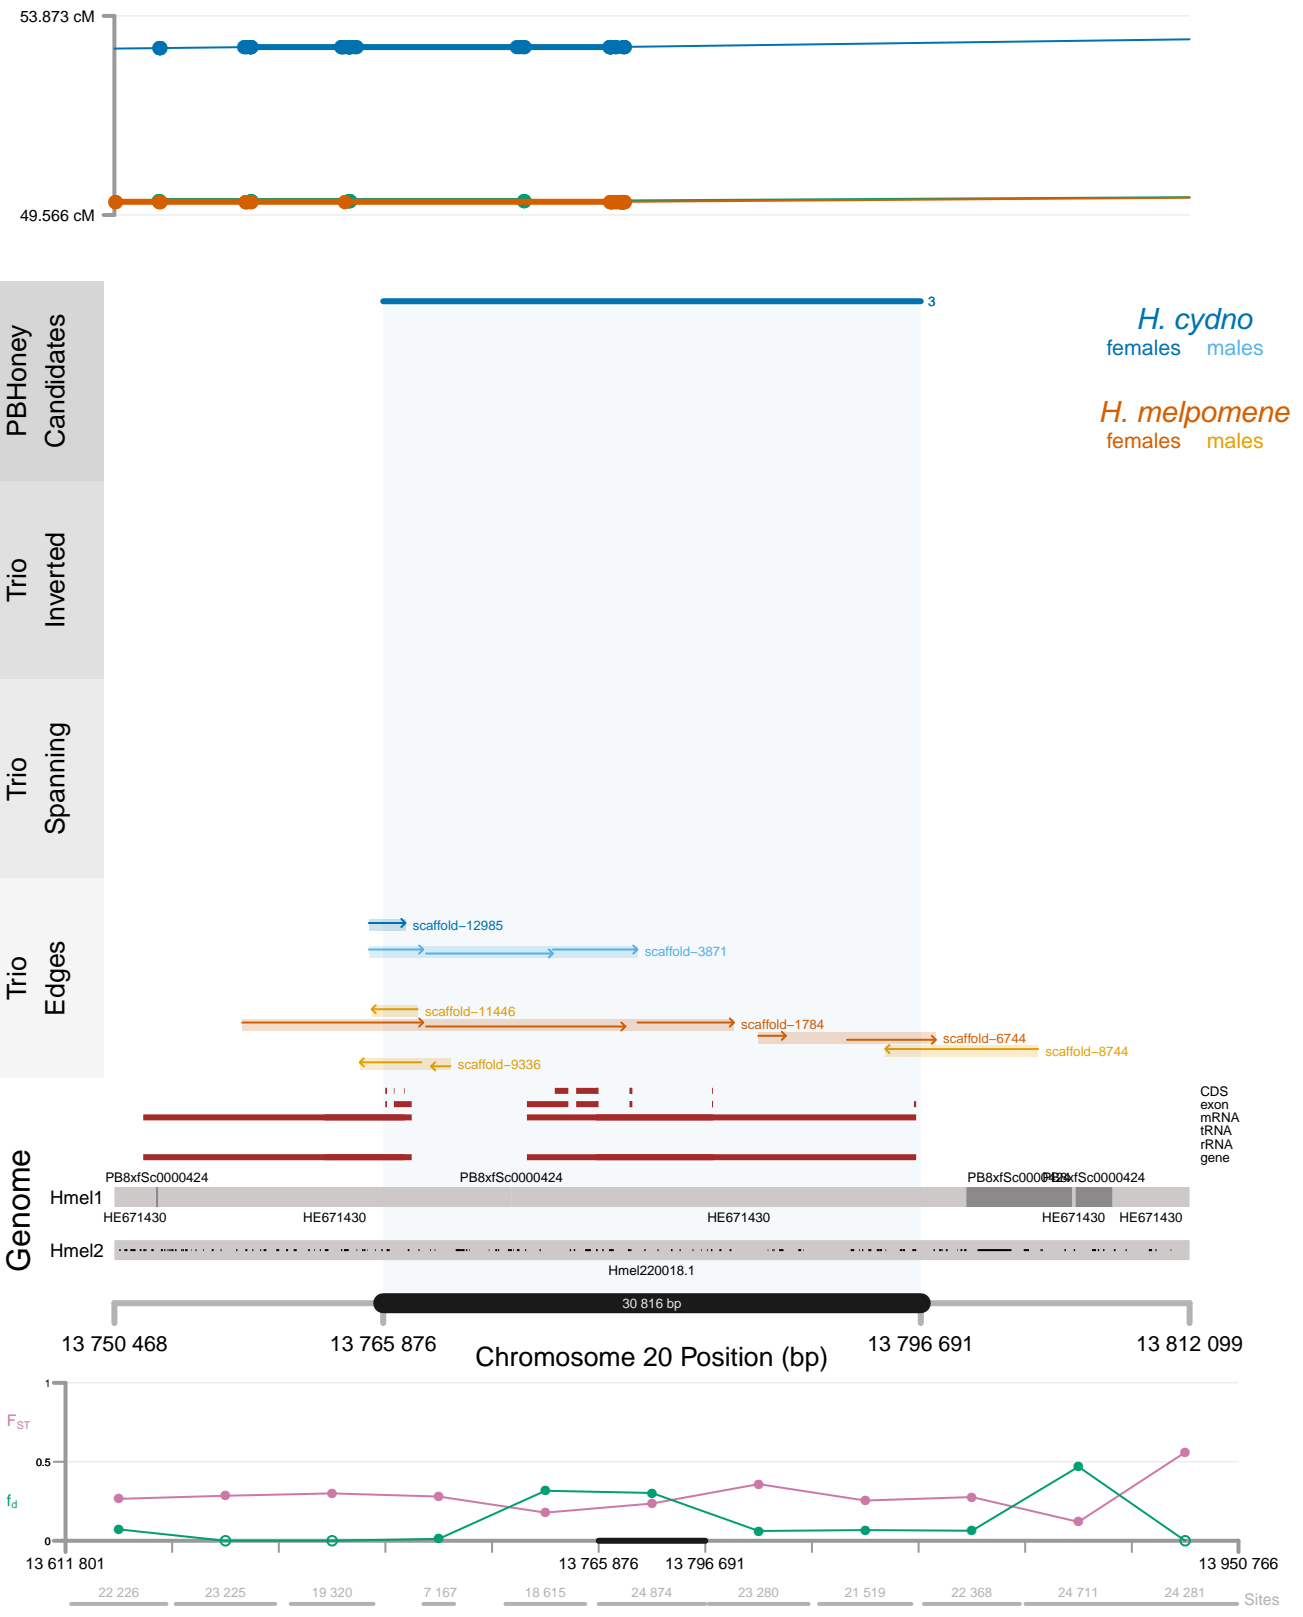



Figure S9.9

*H. cydno*

Split reads only

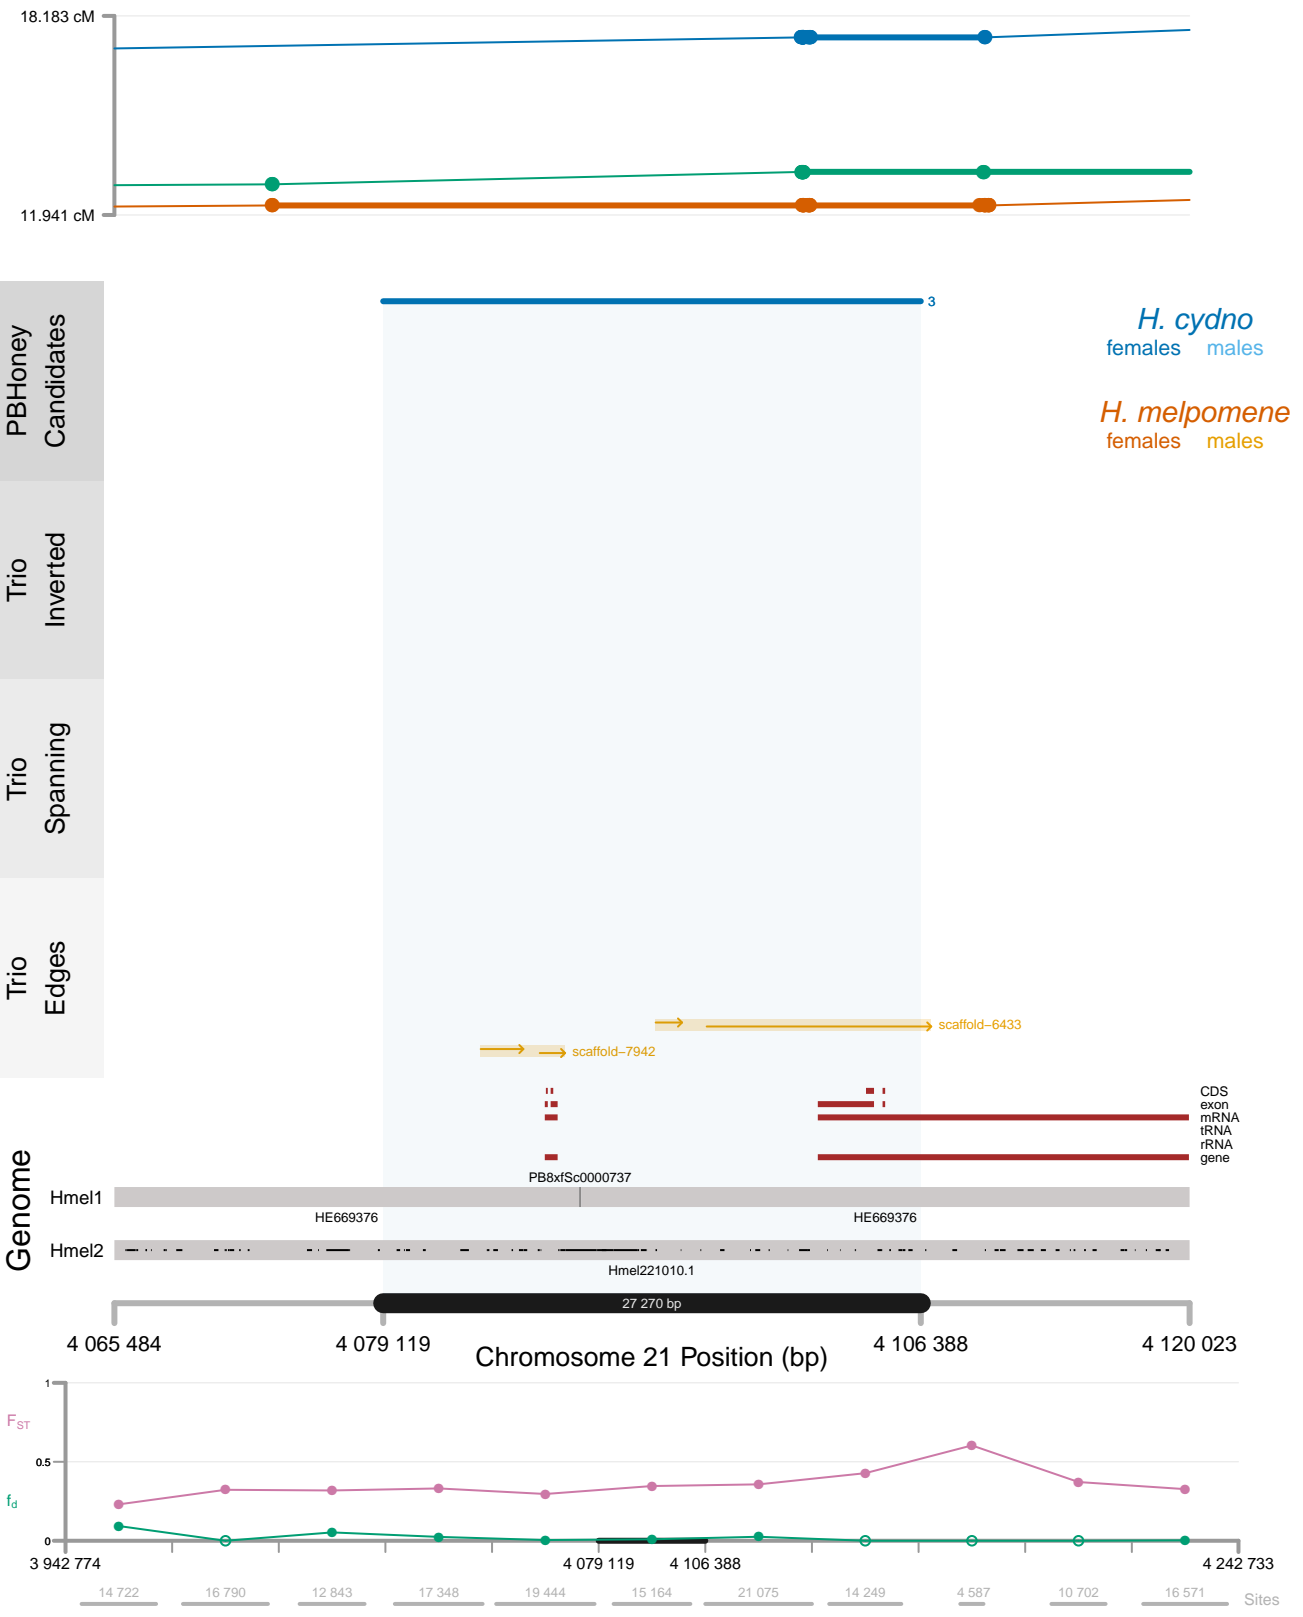

Figure S9.10

*H. cydno*

Split reads only

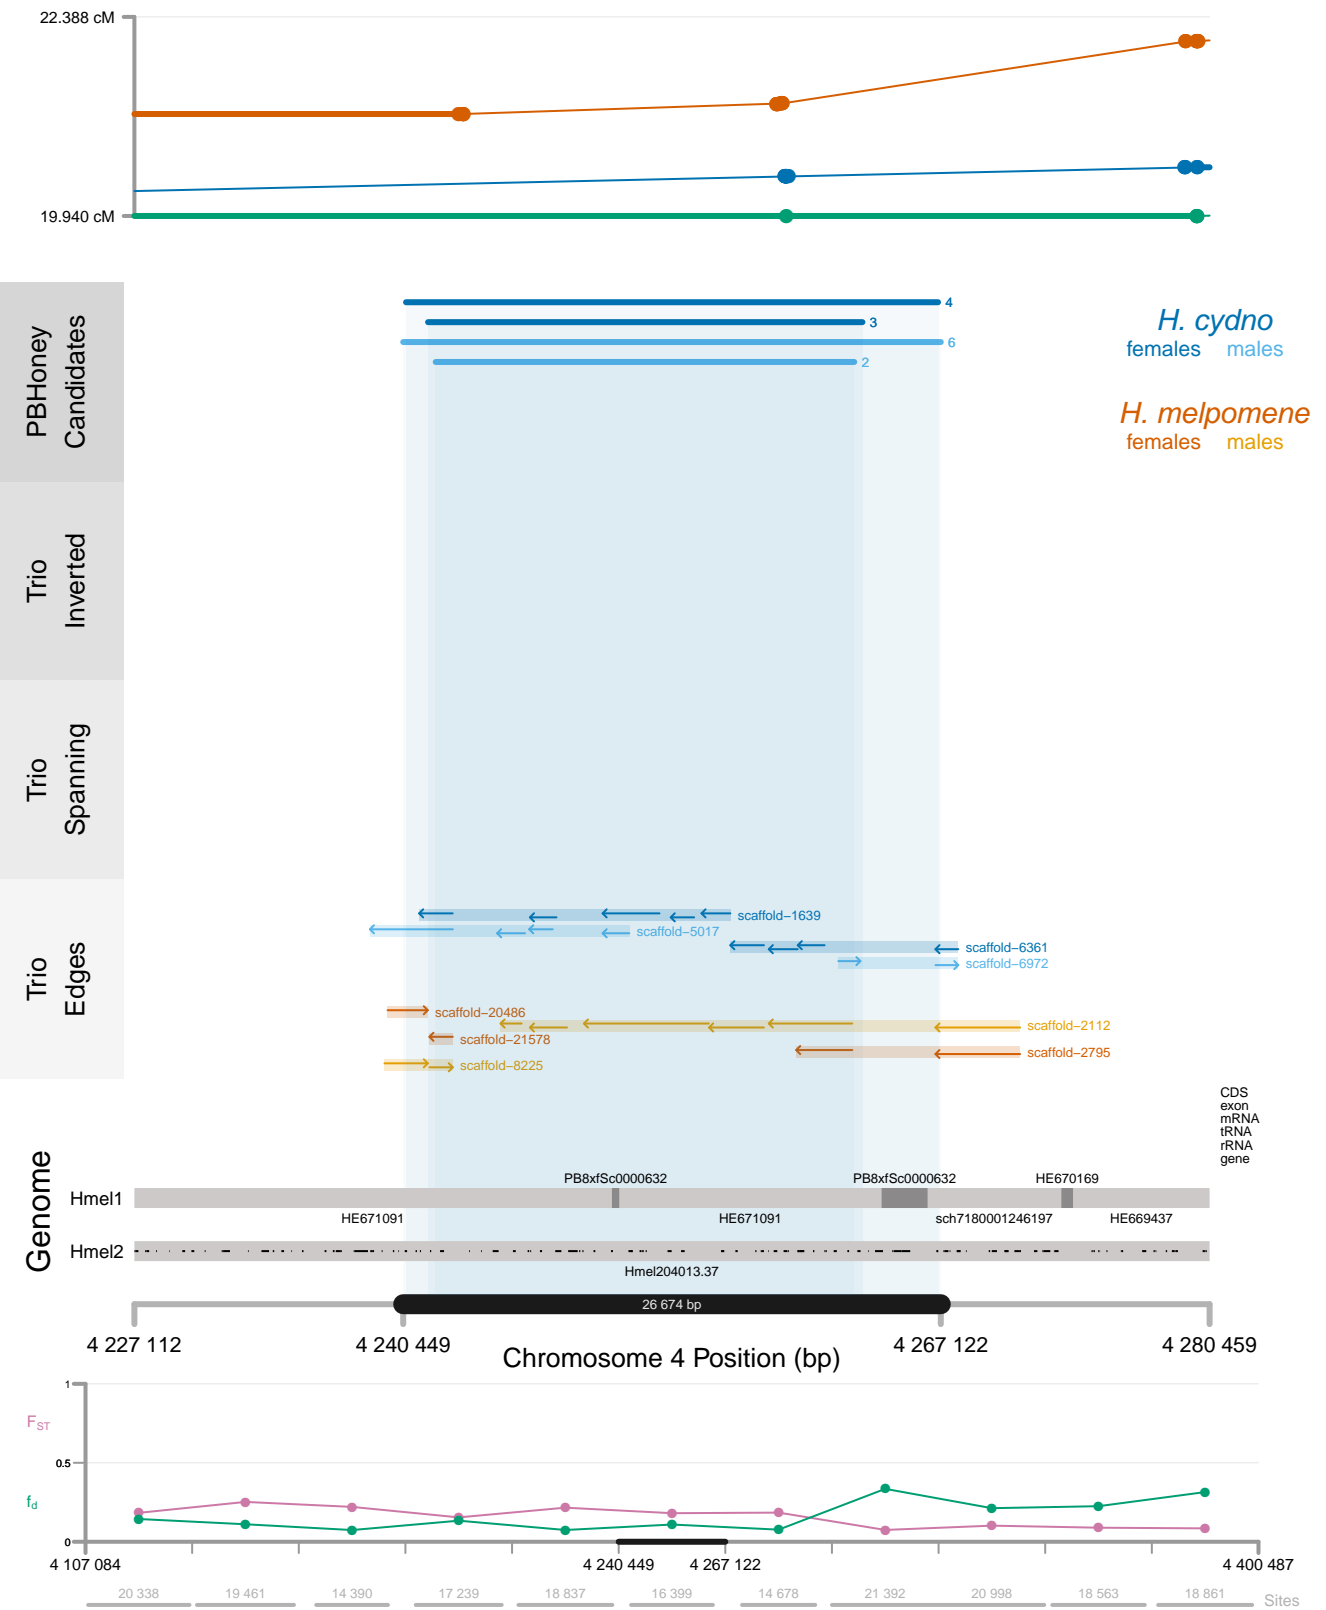

Figure S9.11

*H. cydno*

Split reads only

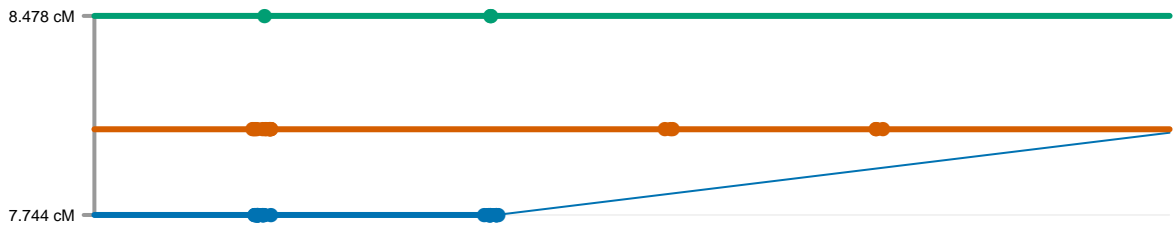

PBHoney Candidates  
Trio Inverted  
Trio Spanning  
Trio Edges

*H. cydno*  
females males  
*H. melpomene*  
females males

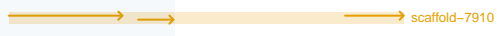

Genome

CDS  
exon  
mRNA  
tRNA  
rRNA  
gene

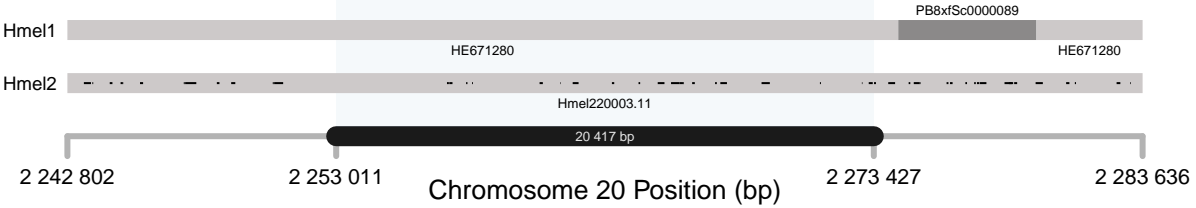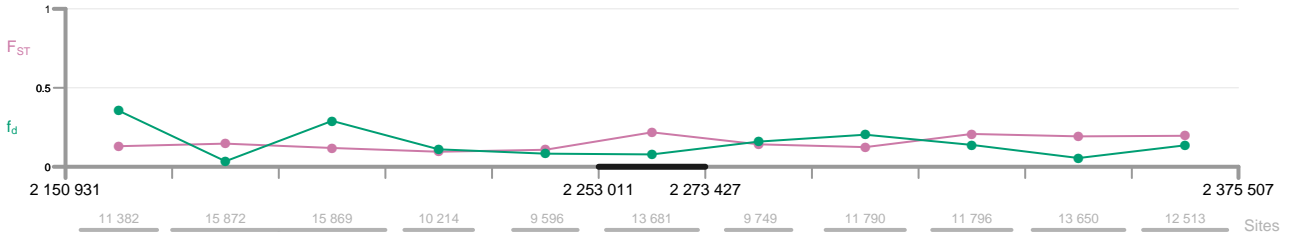

Figure S9.12

*H. cydno*

Split reads only

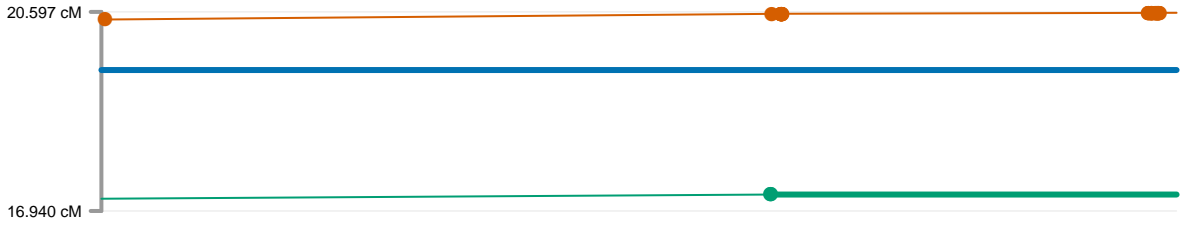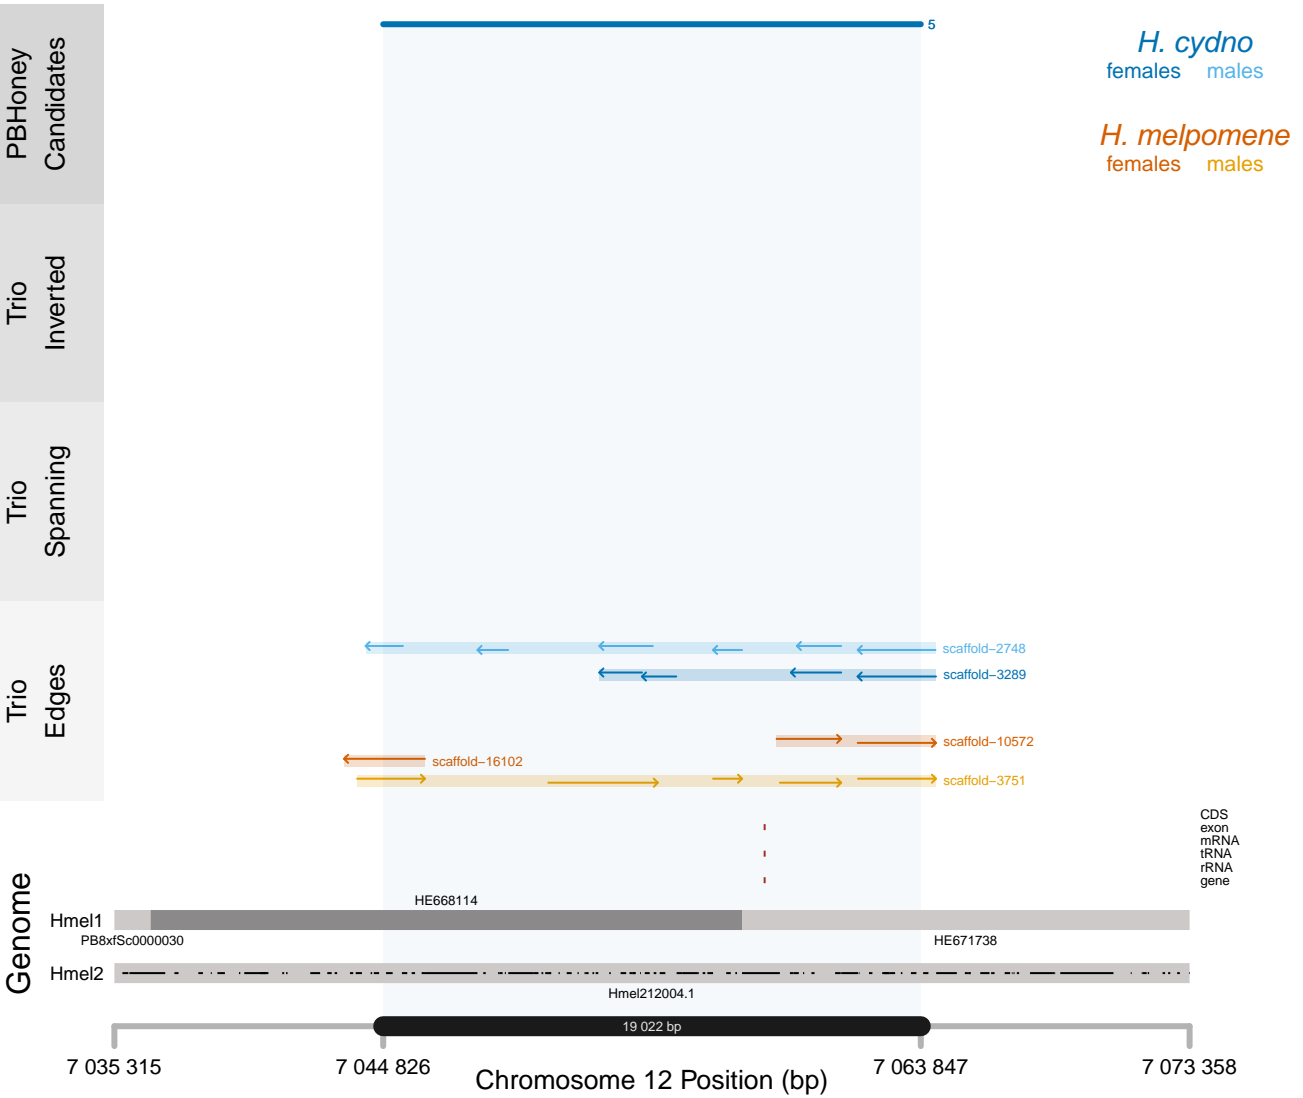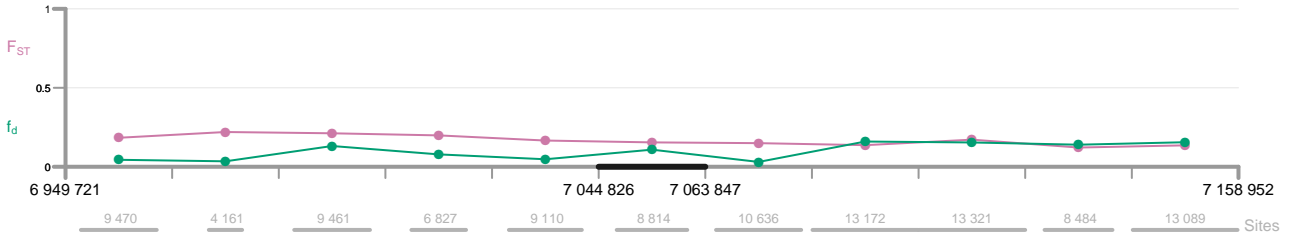

Figure S9.13

*H. cydno*

Split reads only

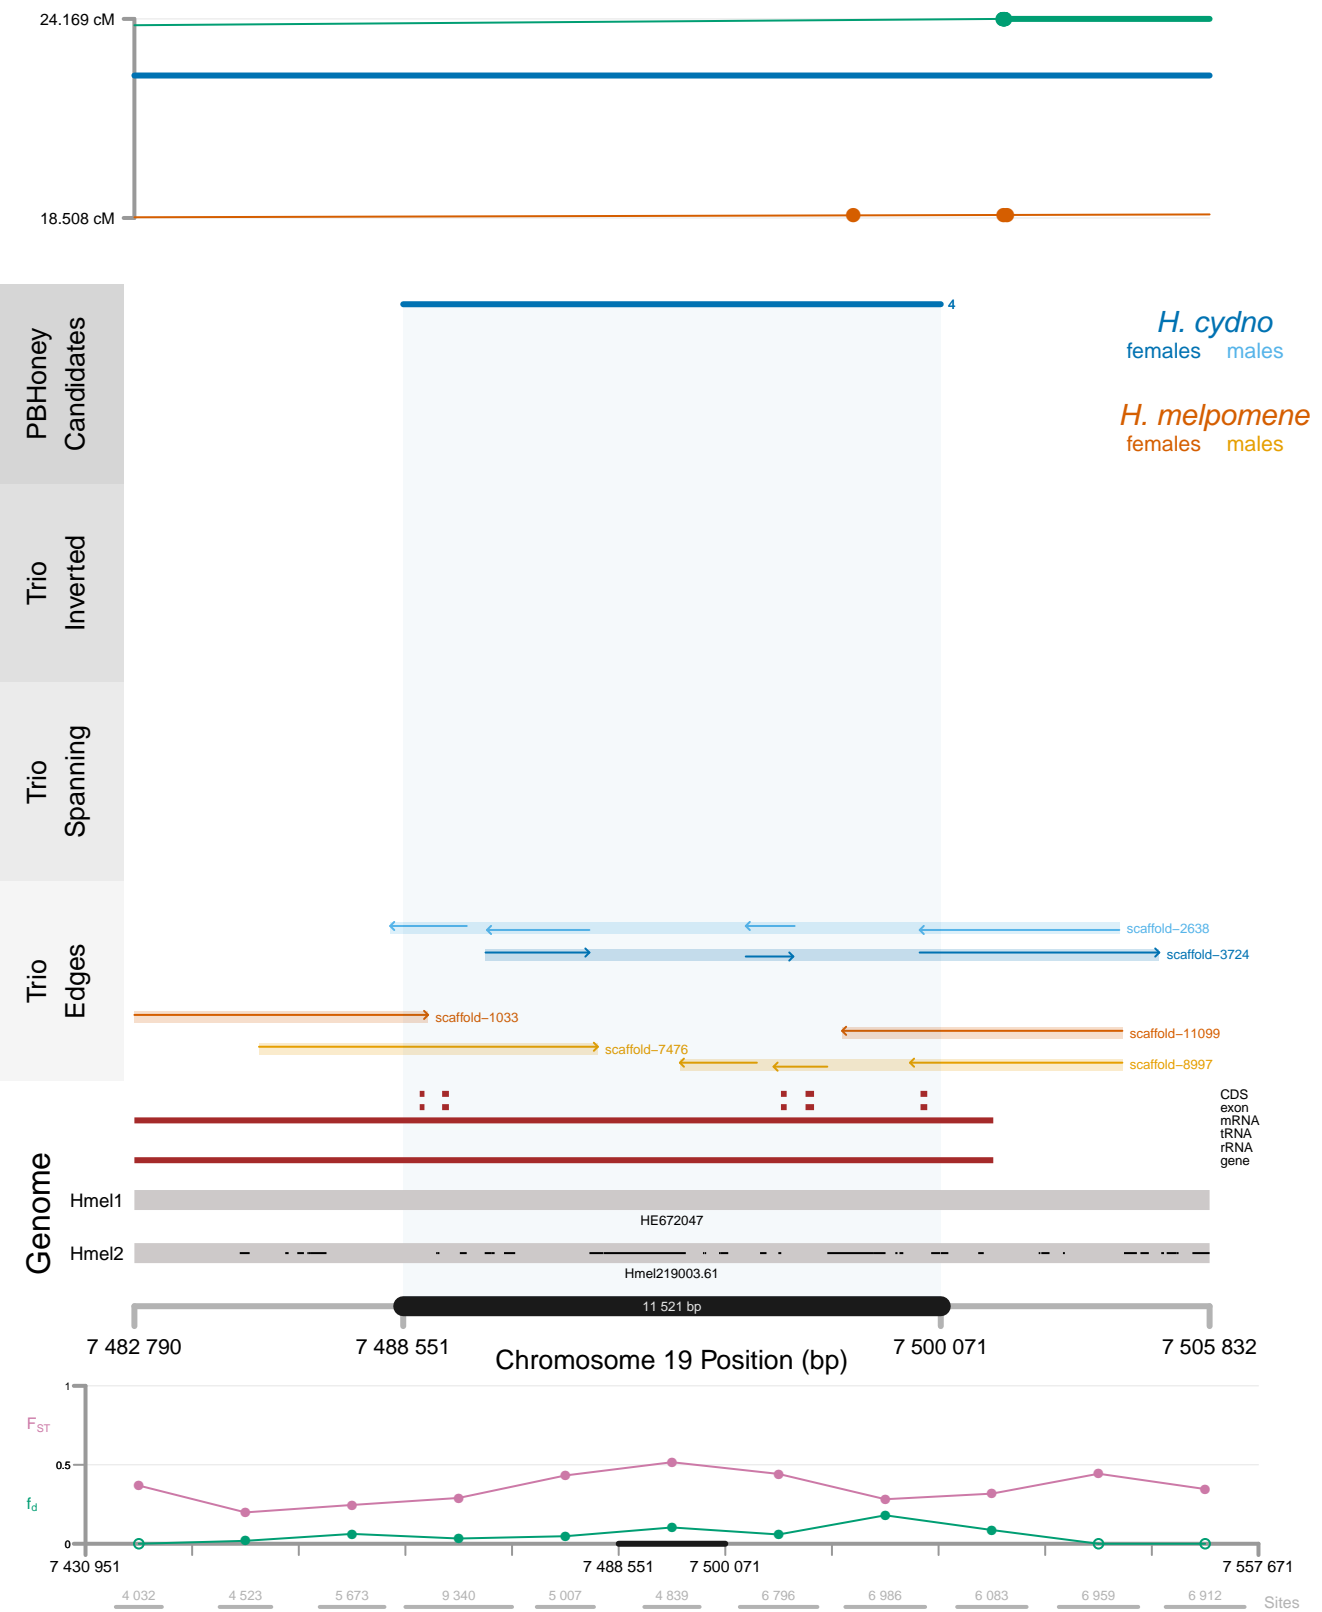

Figure S9.14

*H. cydno*

Split reads only

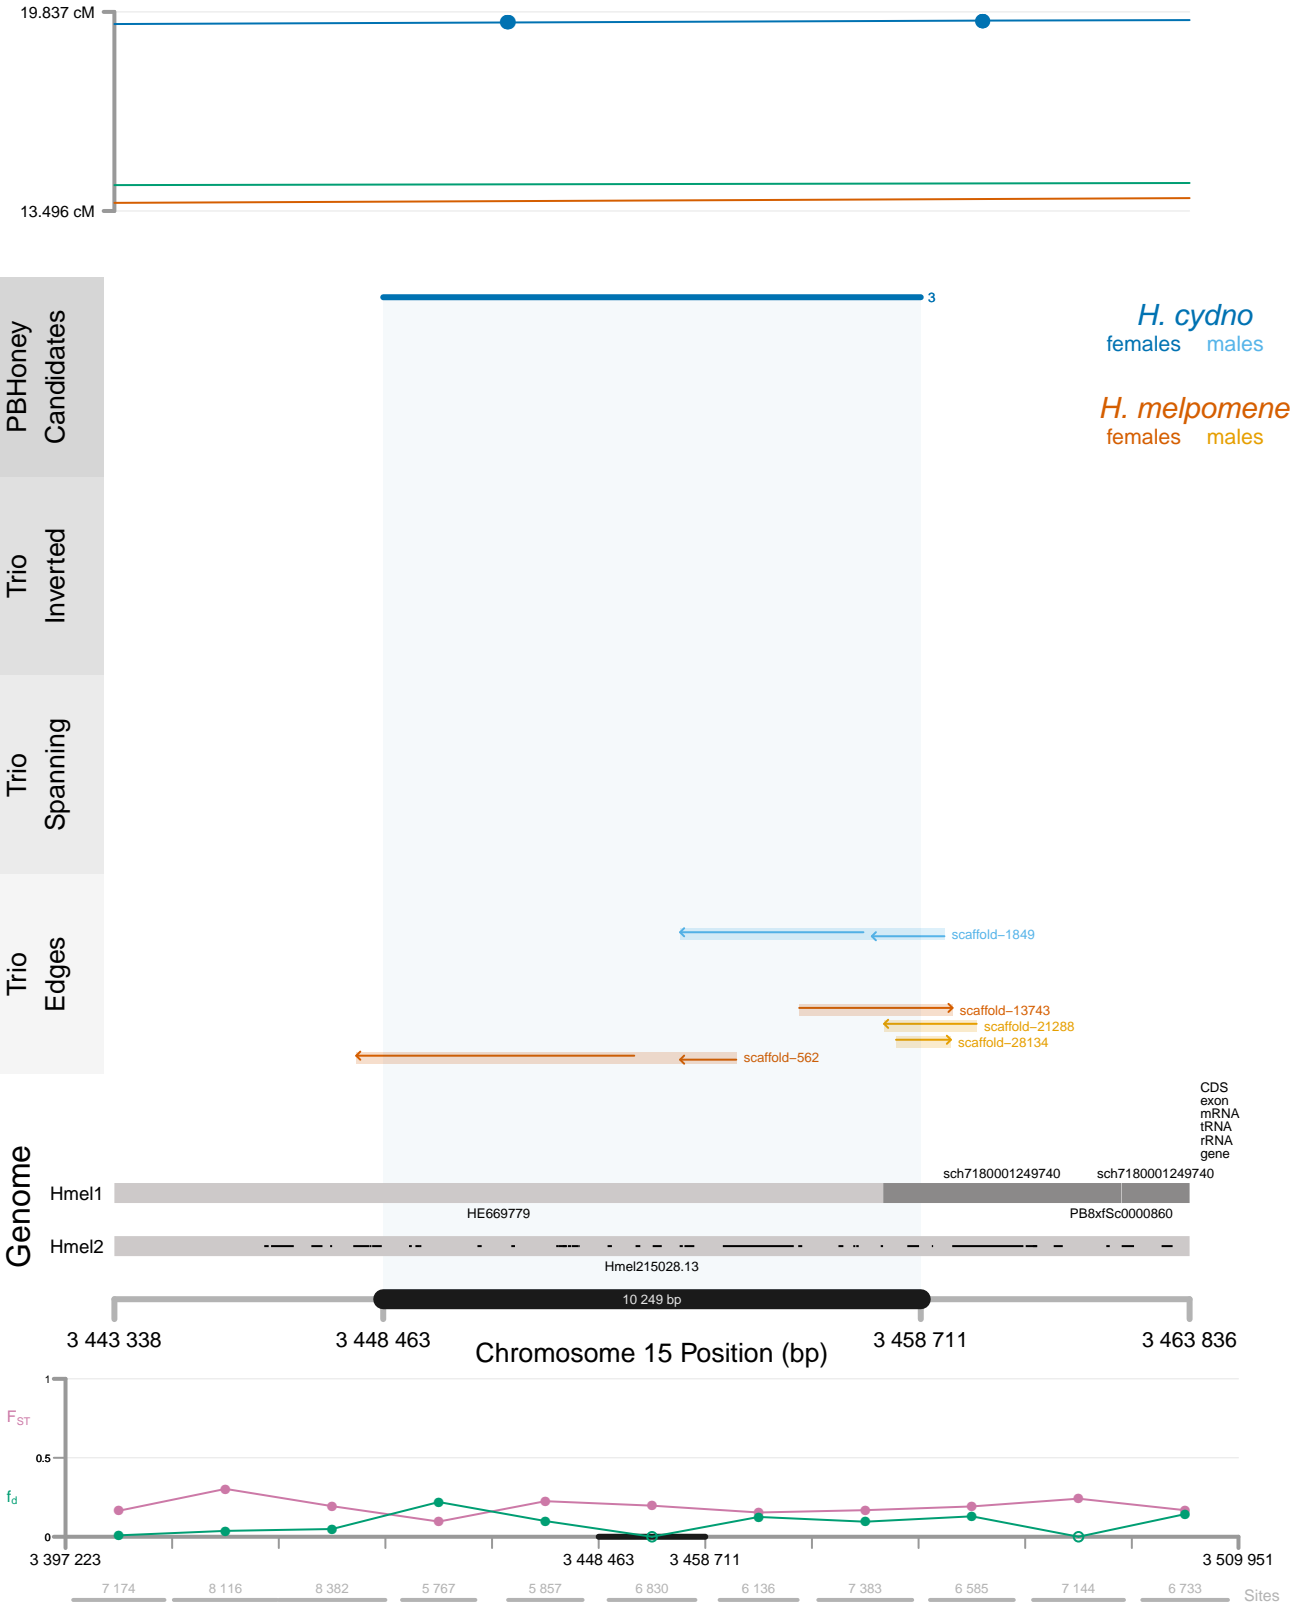

Figure S9.15

*H. cydno*

Split reads only

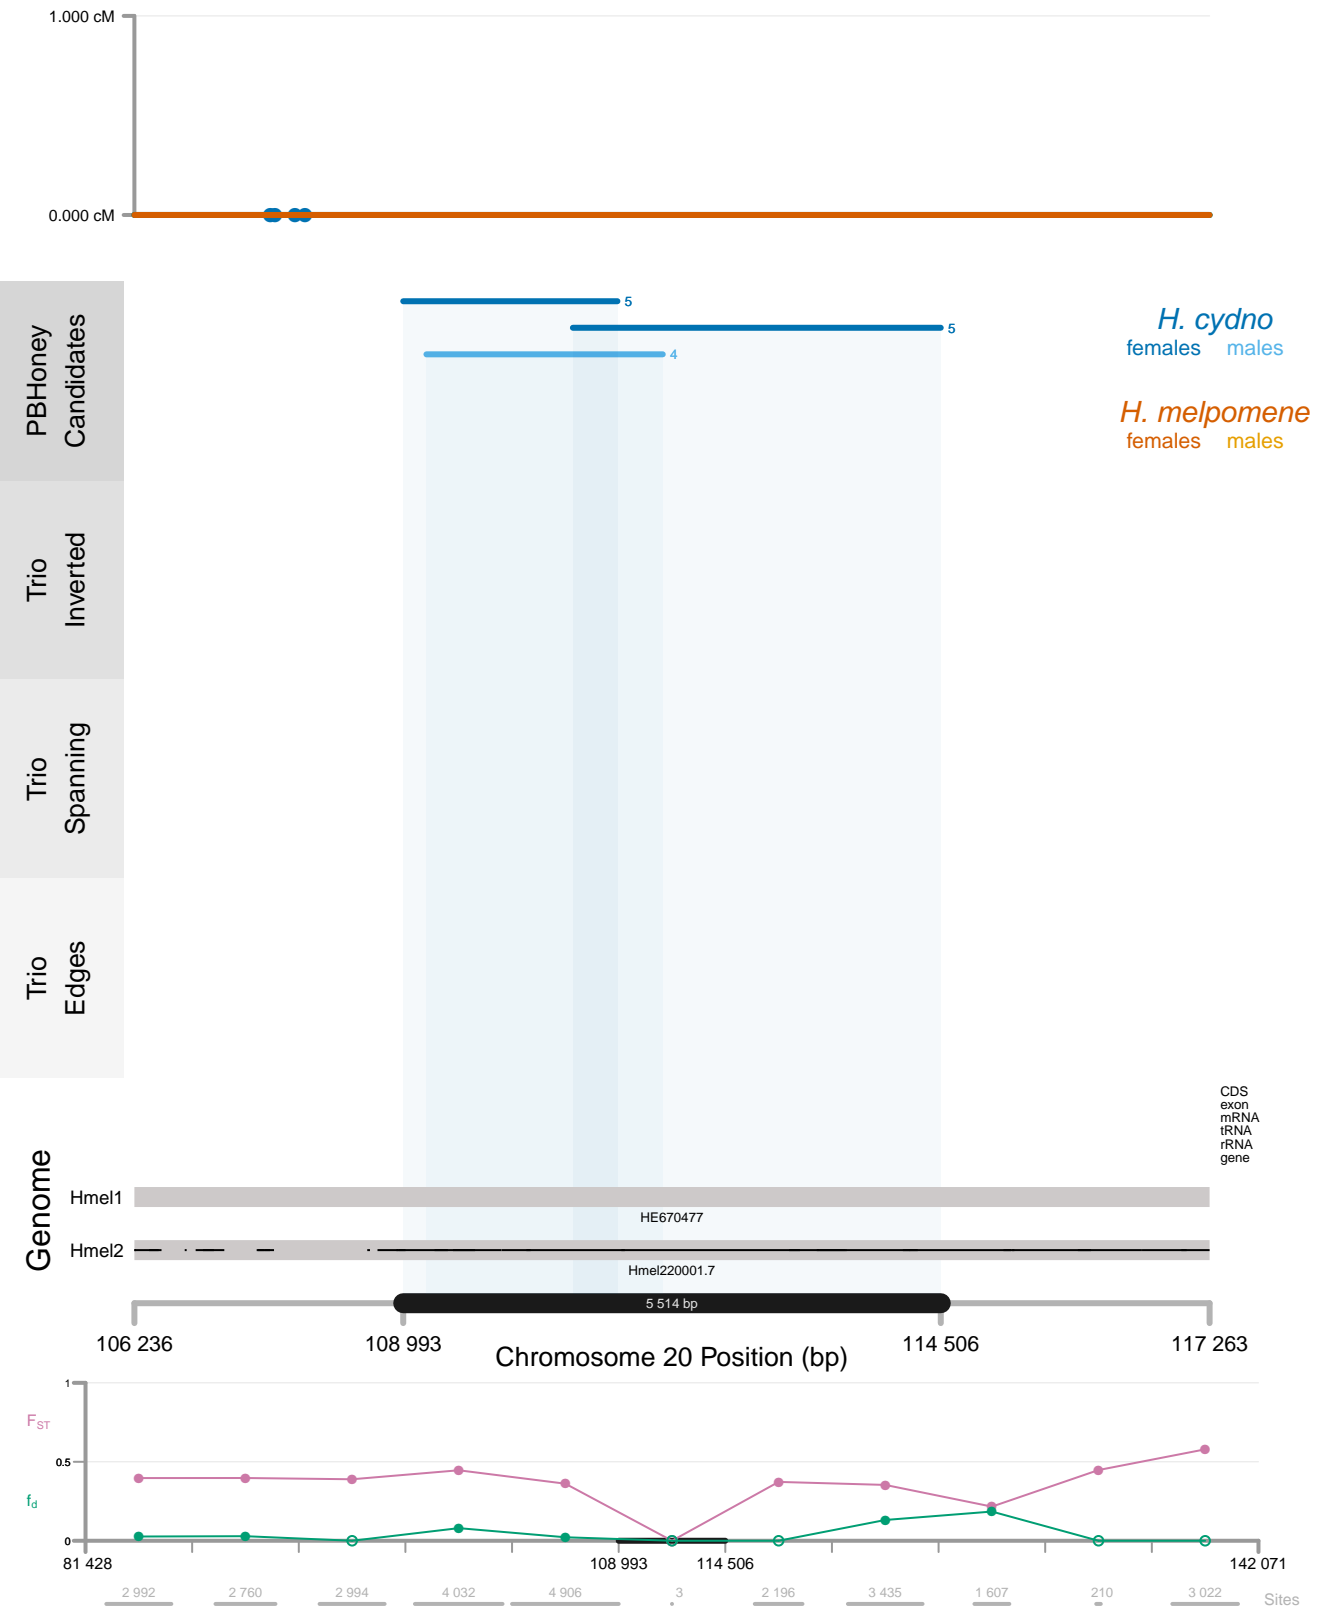

Figure S9.16

*H. cydno*

Split reads only

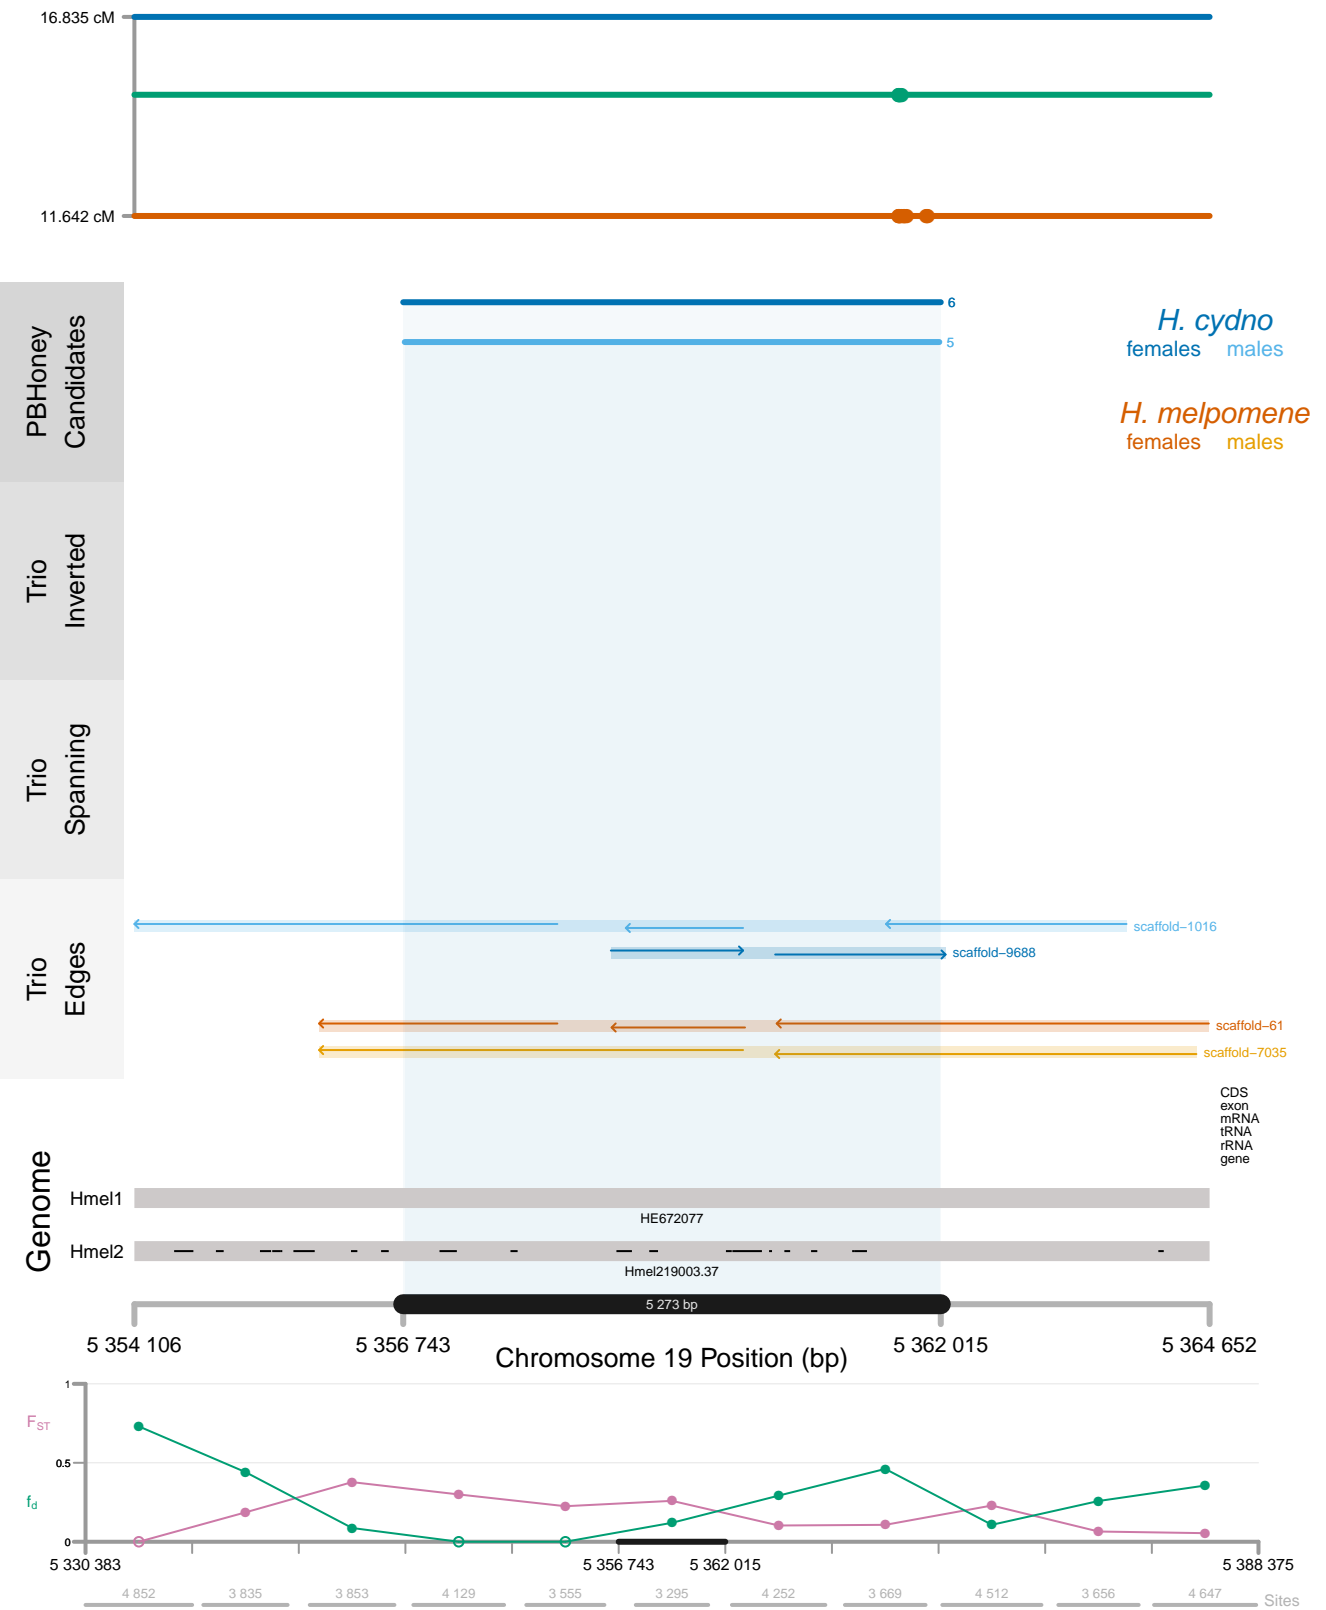



Figure S9.17

*H. cydno*

Split reads only

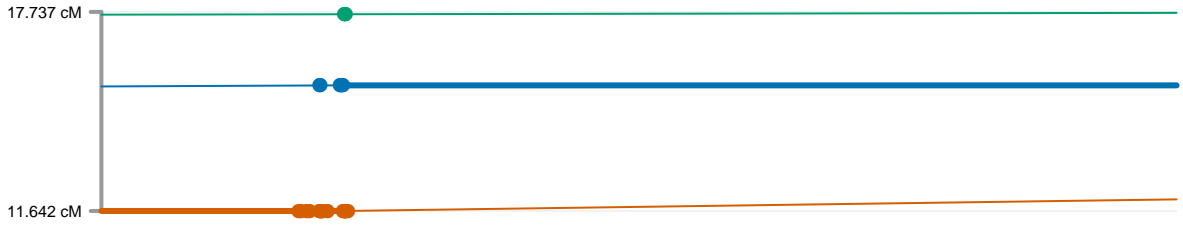

PBHoney Candidates

*H. cydno*  
females males

*H. melpomene*  
females males

Trio Inverted

Trio Spanning

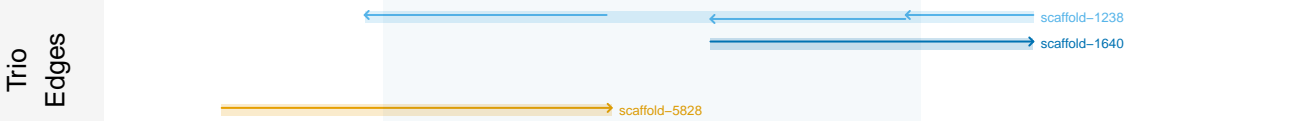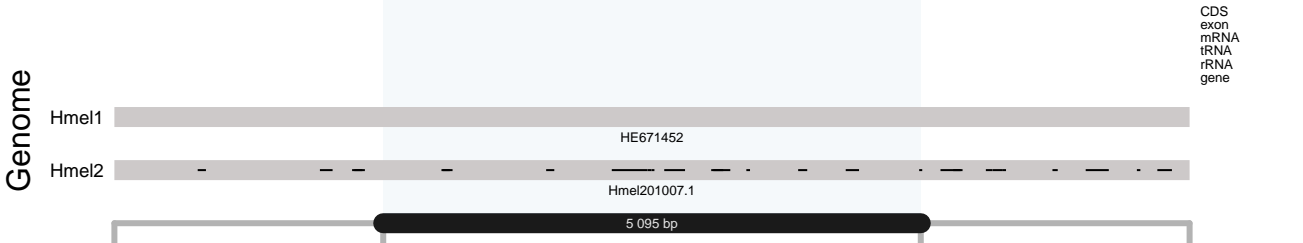

Chromosome 1 Position (bp)

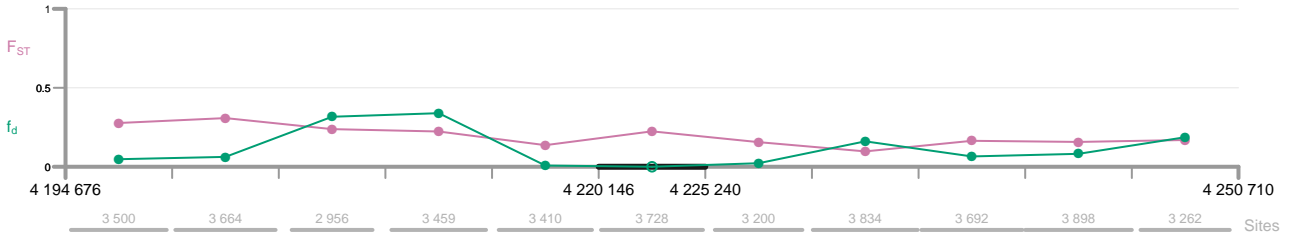

Figure S9.18

*H. cydno*

Split reads only

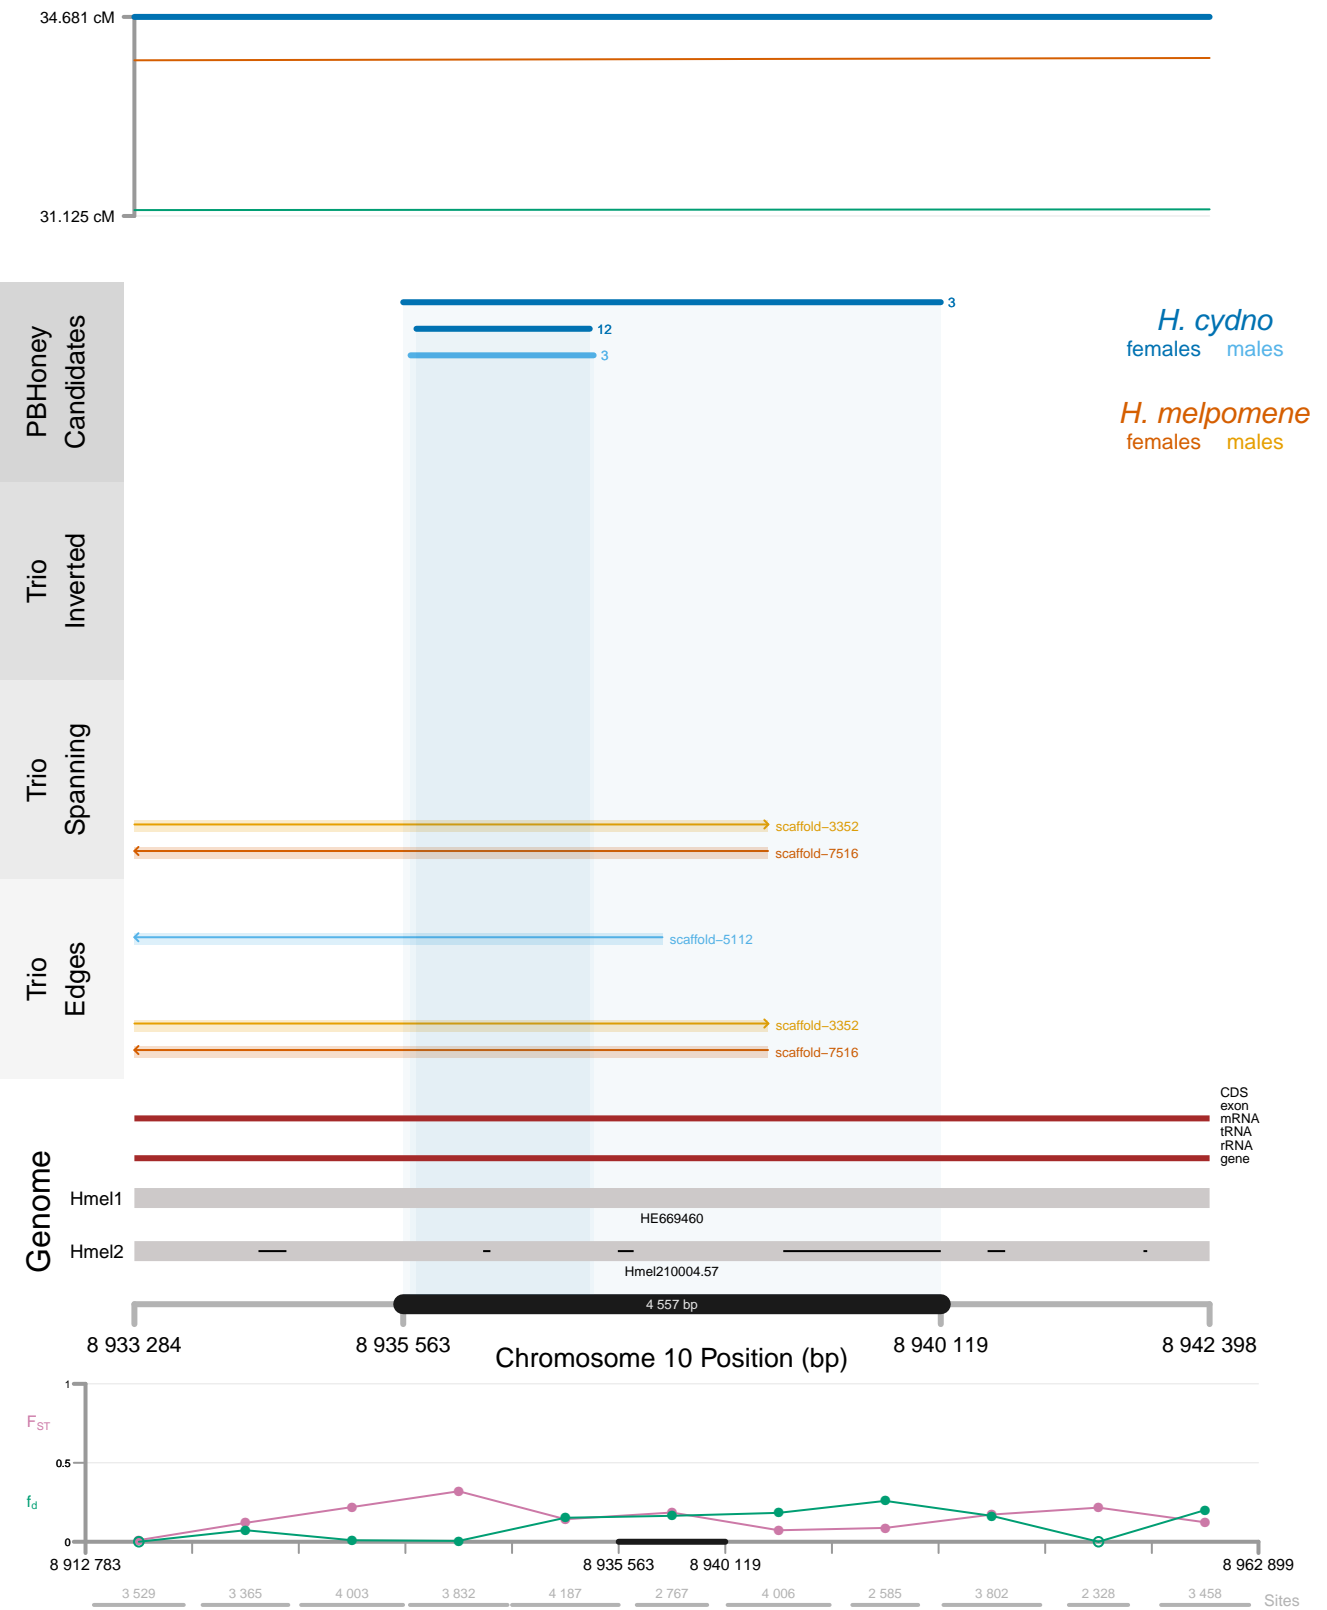

Figure S9.19

*H. cydno*

Split reads only

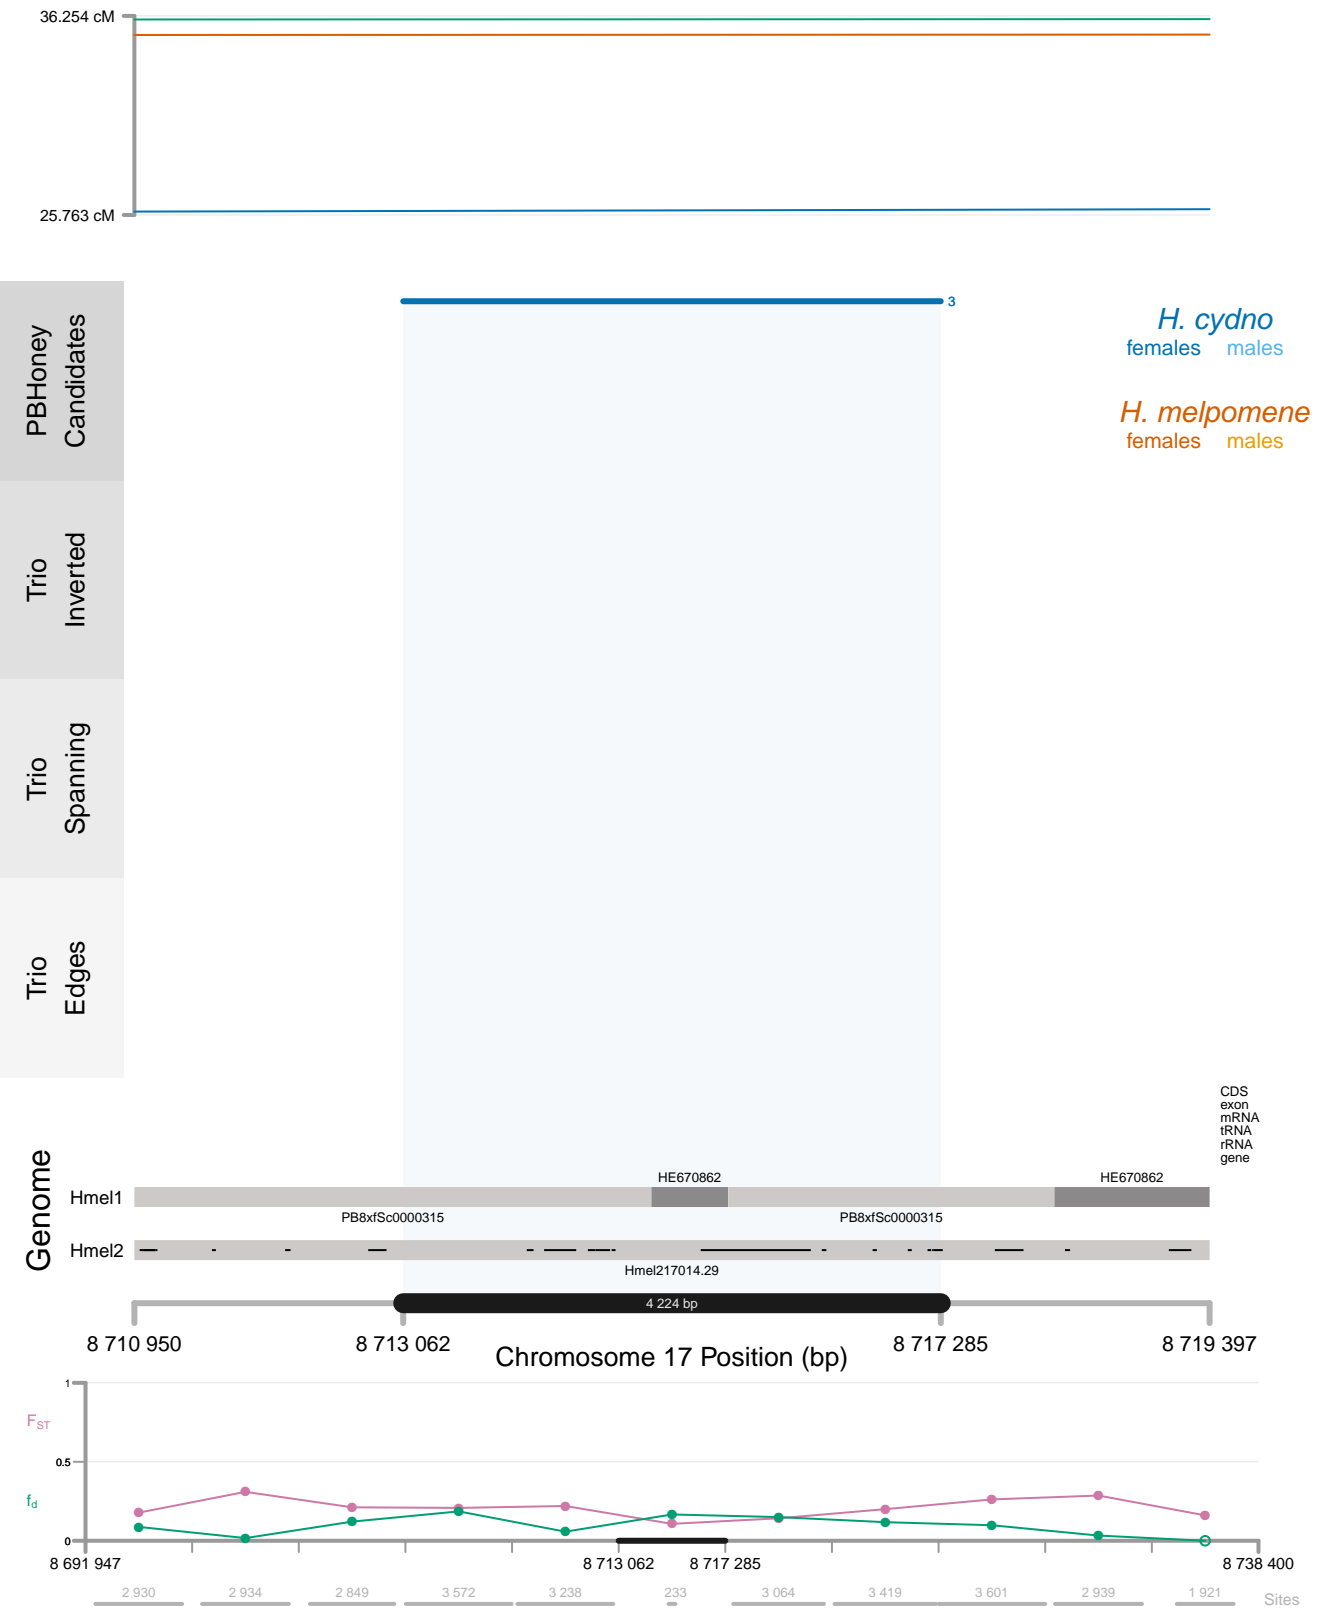

Figure S9.20

*H. cydno*

Split reads only

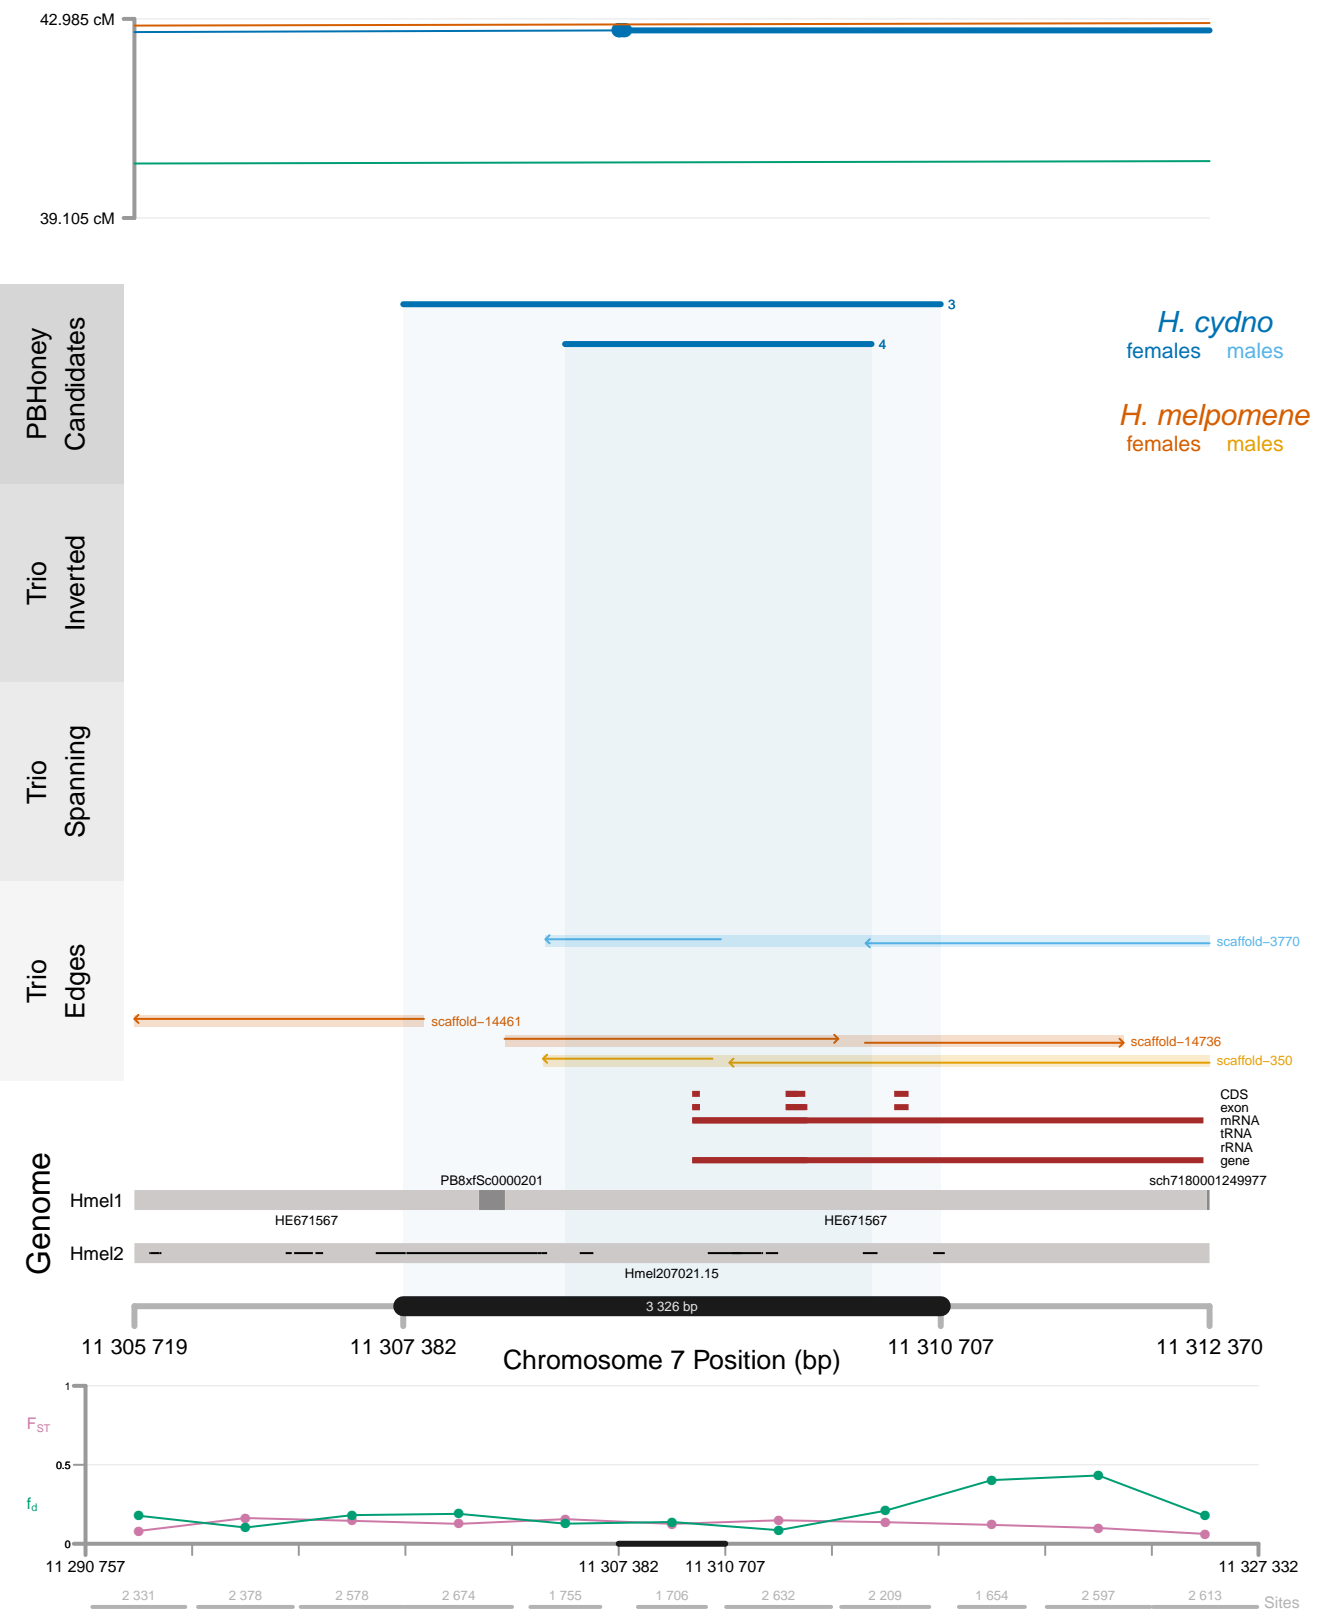

Figure S9.21

*H. cydno*

Split reads only

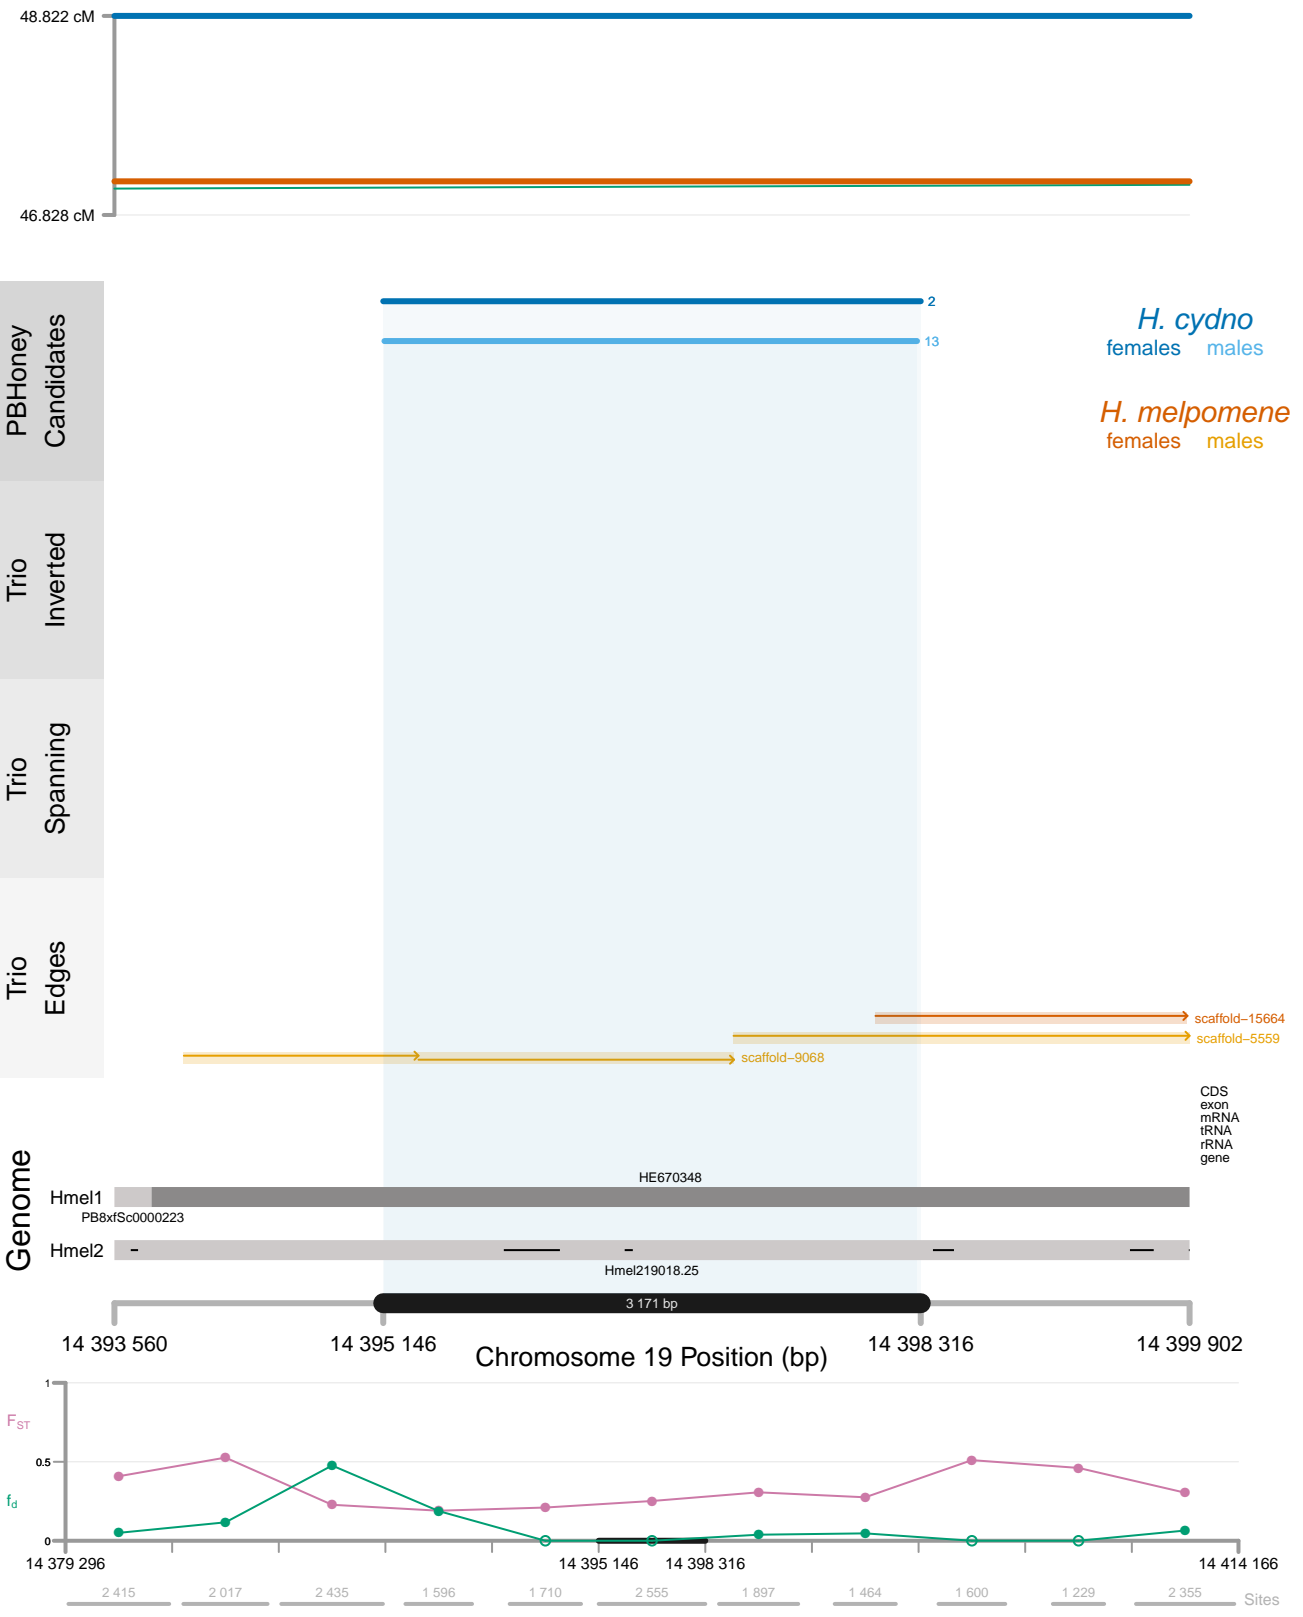

Figure S9.22

*H. cydno*

Split reads only

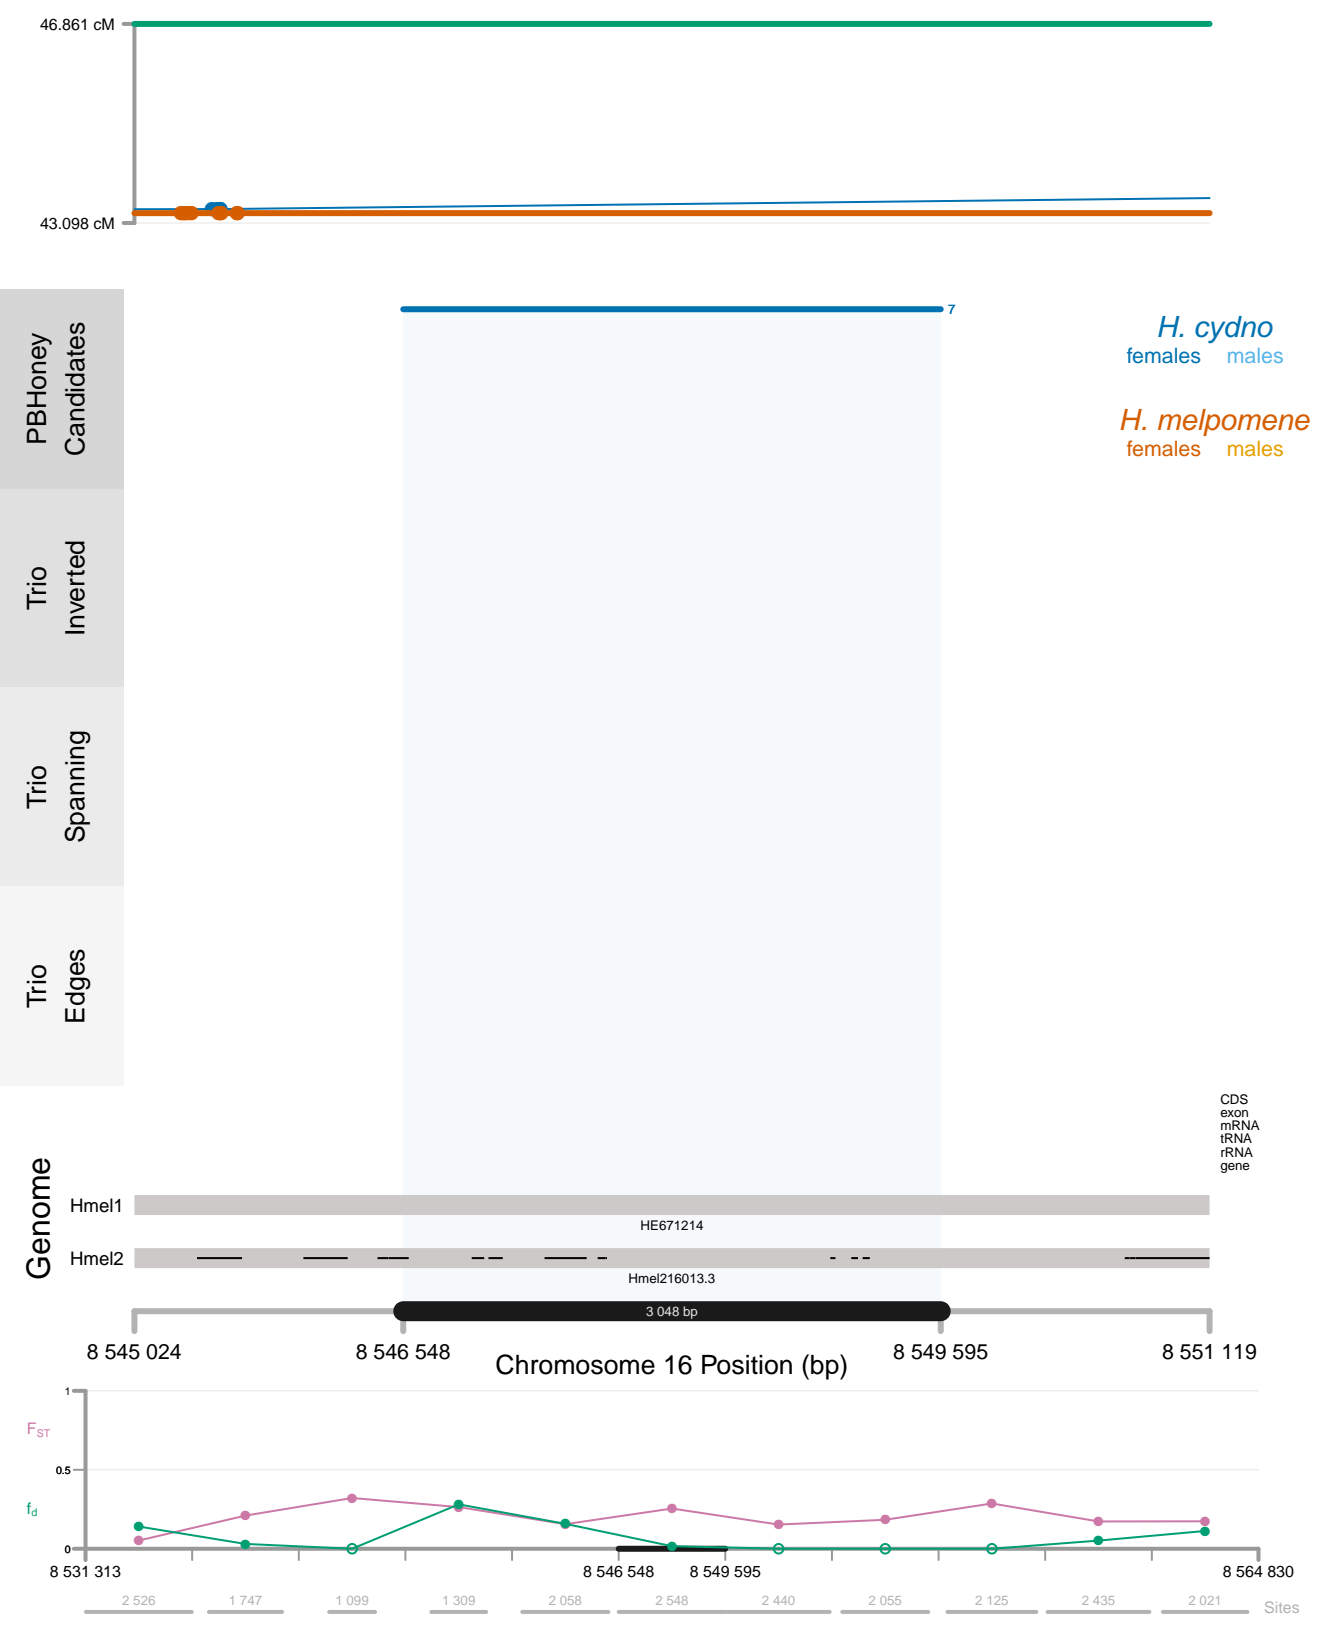

Figure S9.23

*H. cydno*

Split reads only

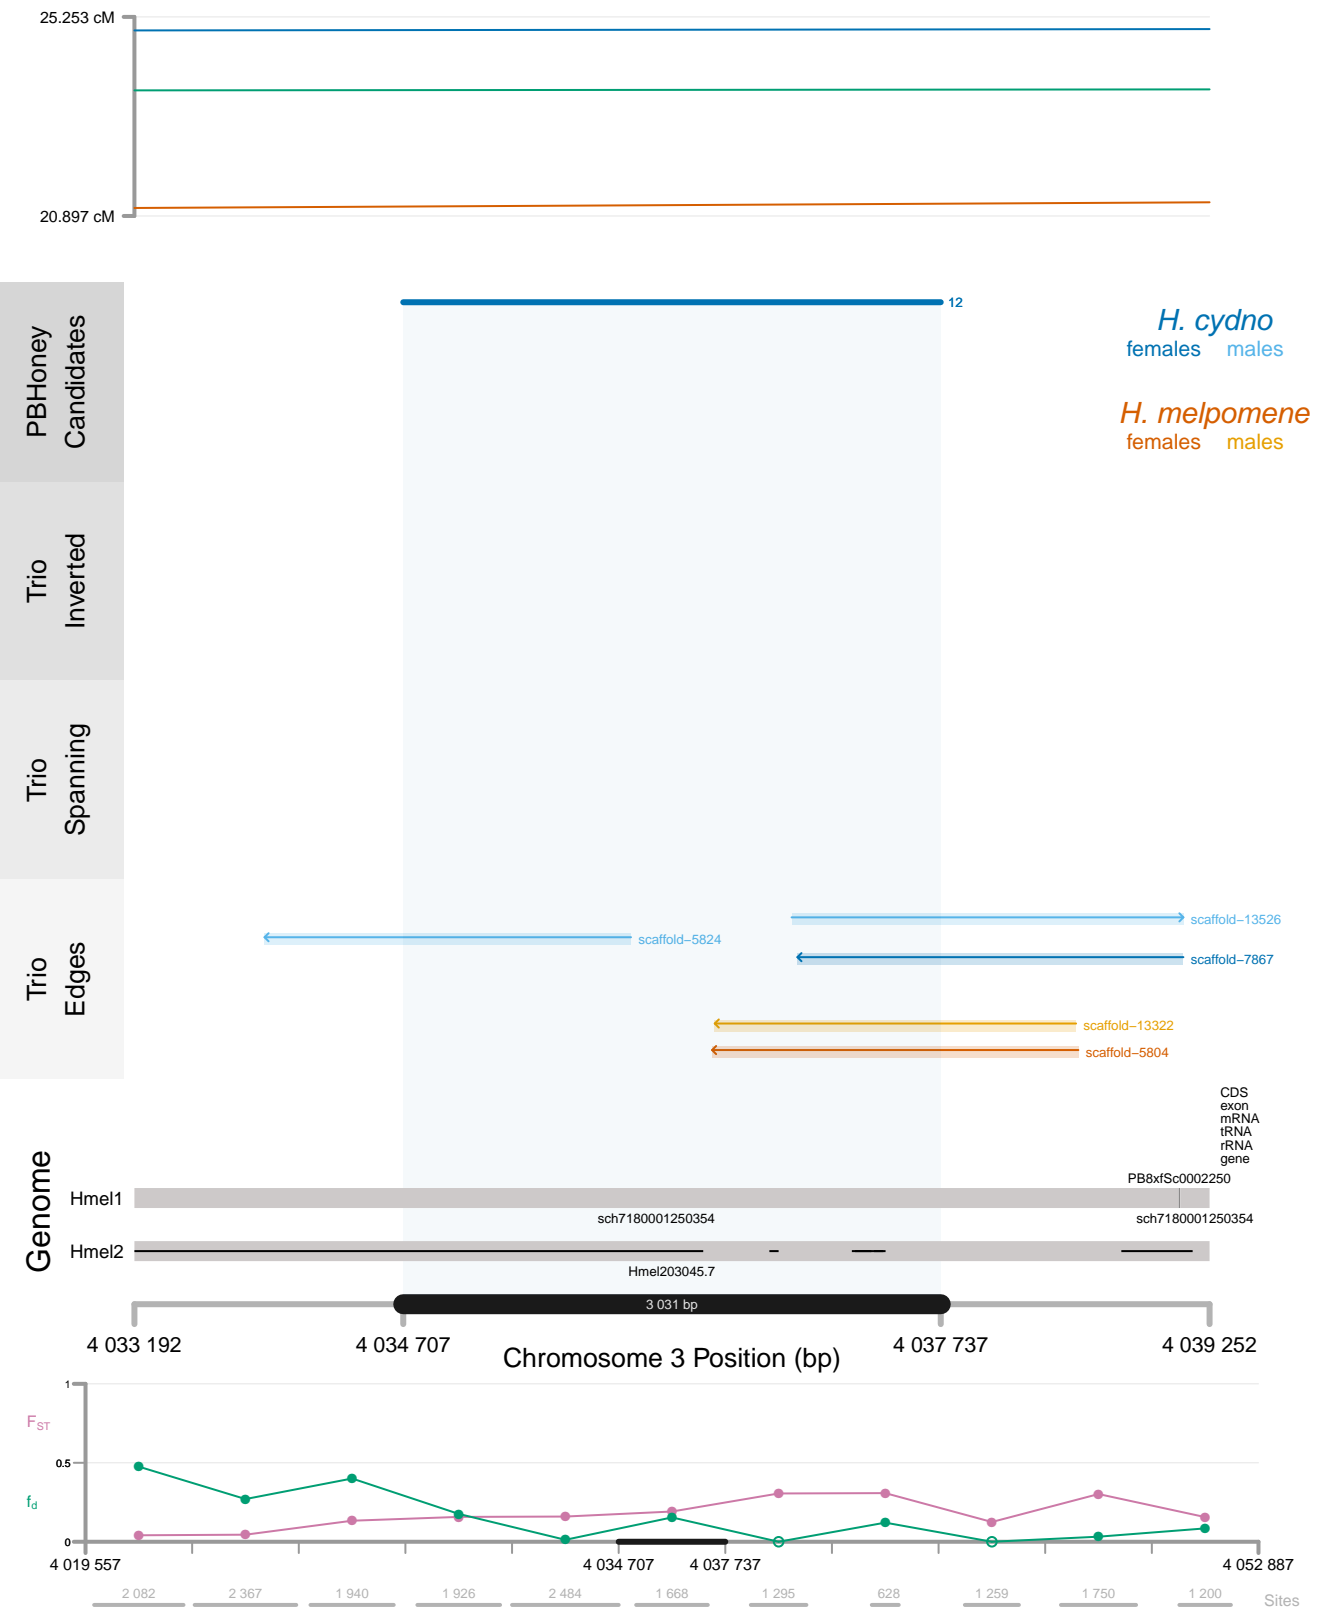

Figure S9.24

*H. cydno*

Split reads only

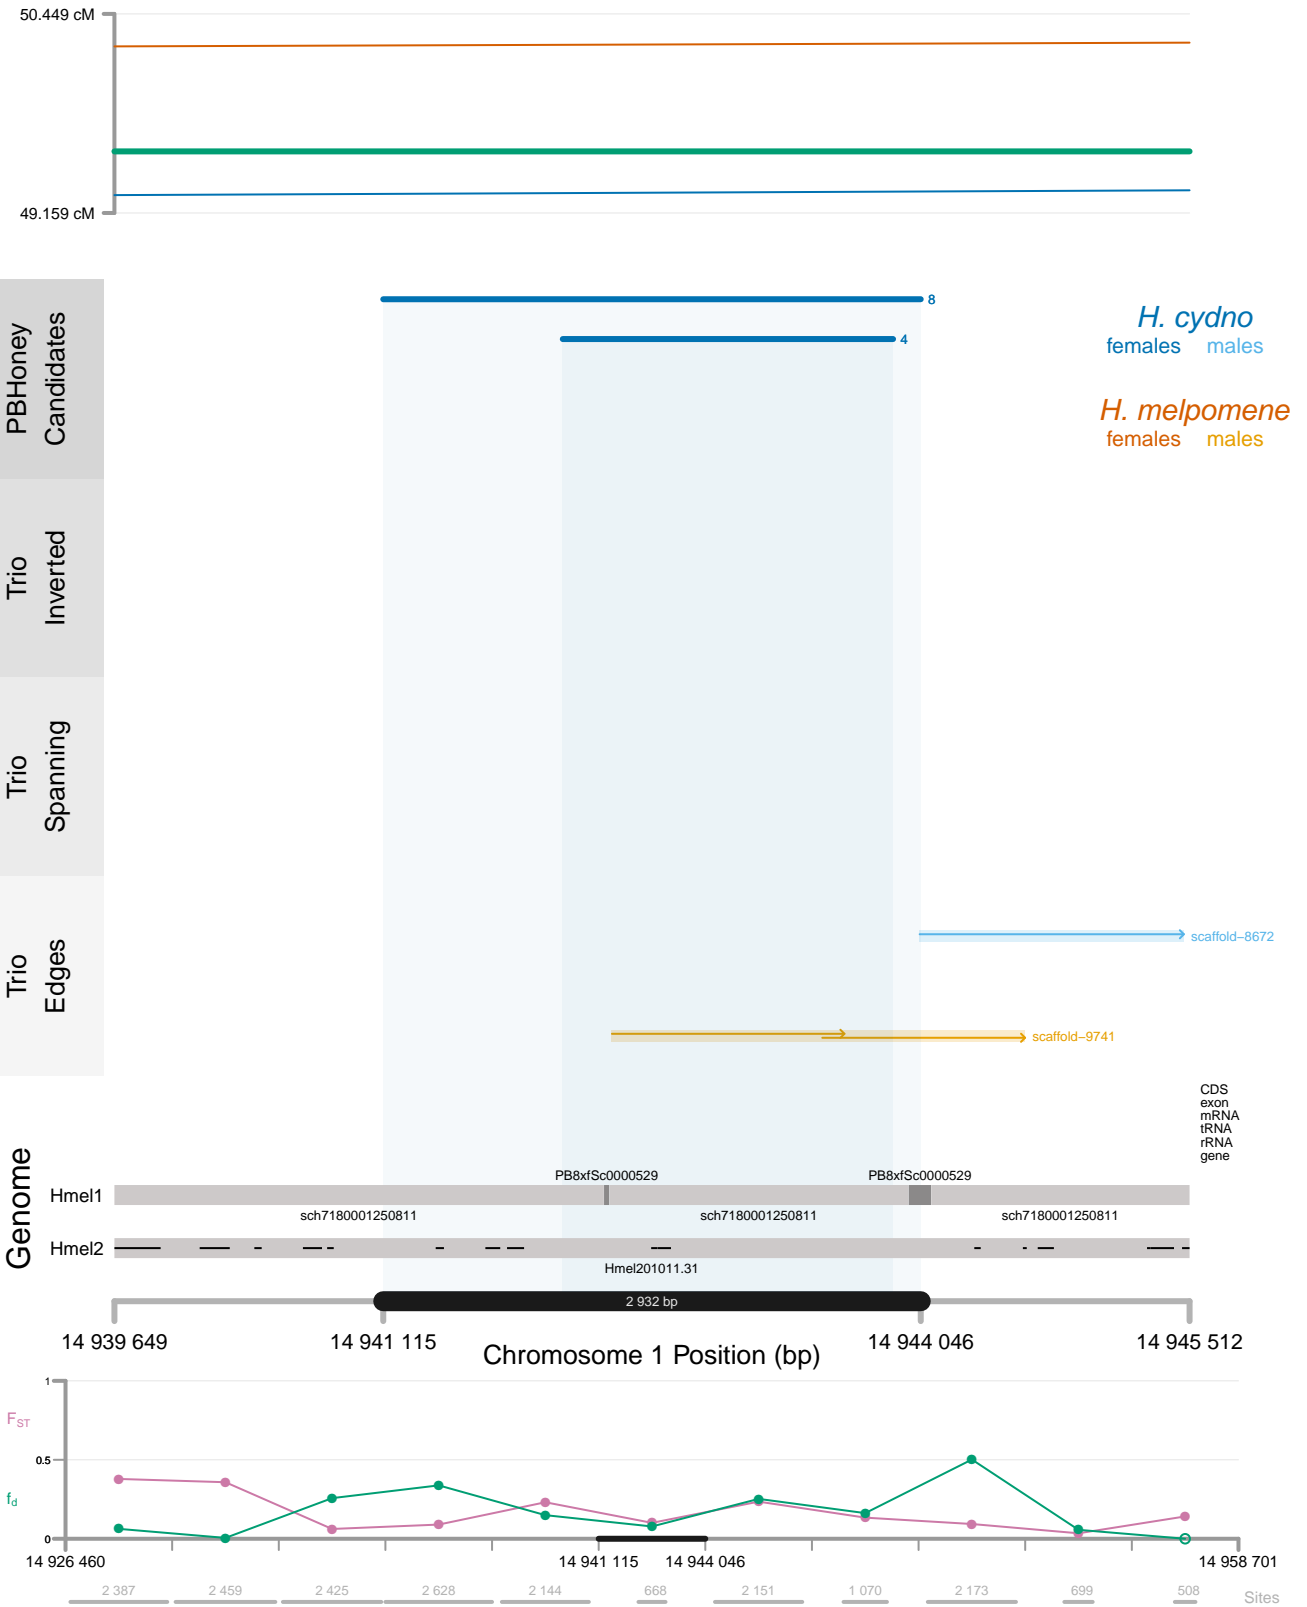



Figure S9.25

*H. cydno*

Split reads only

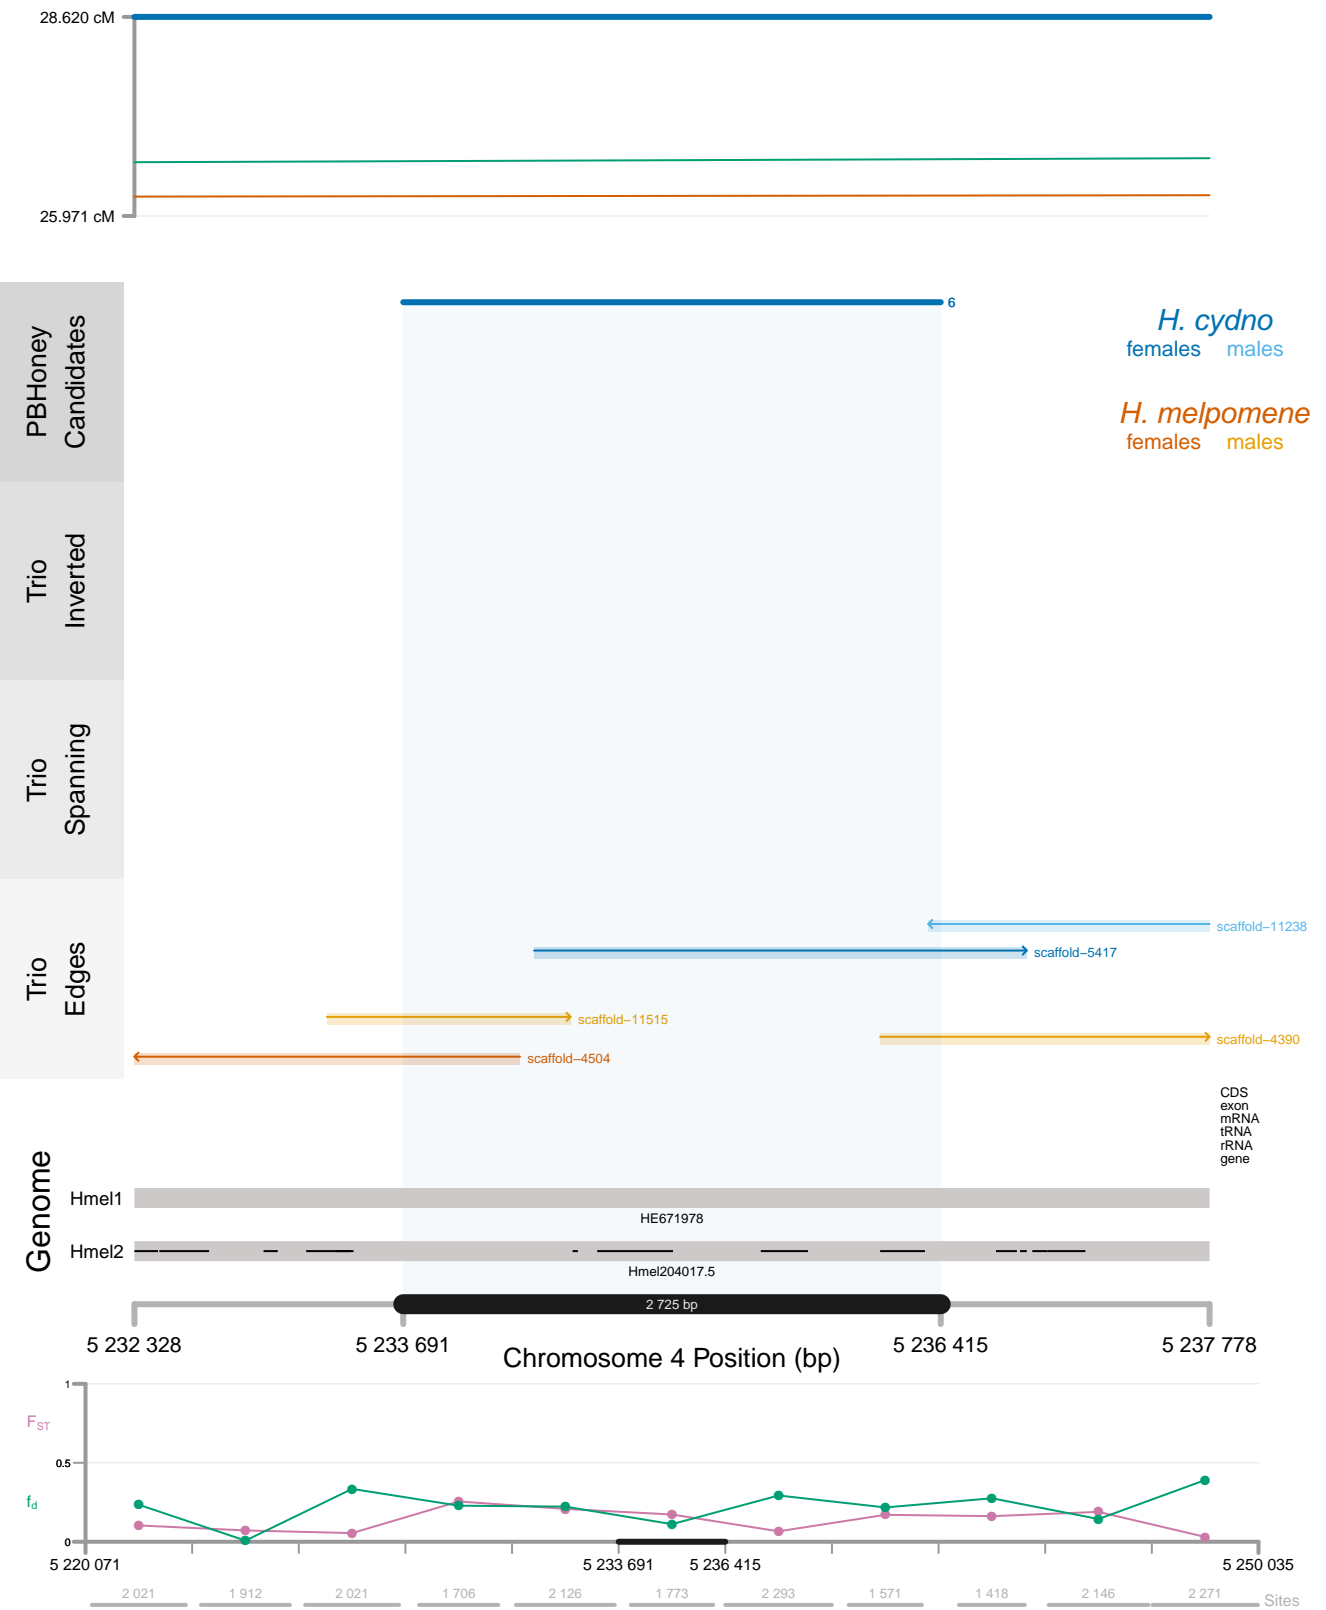

Figure S9.26

*H. cydno*

Split reads only

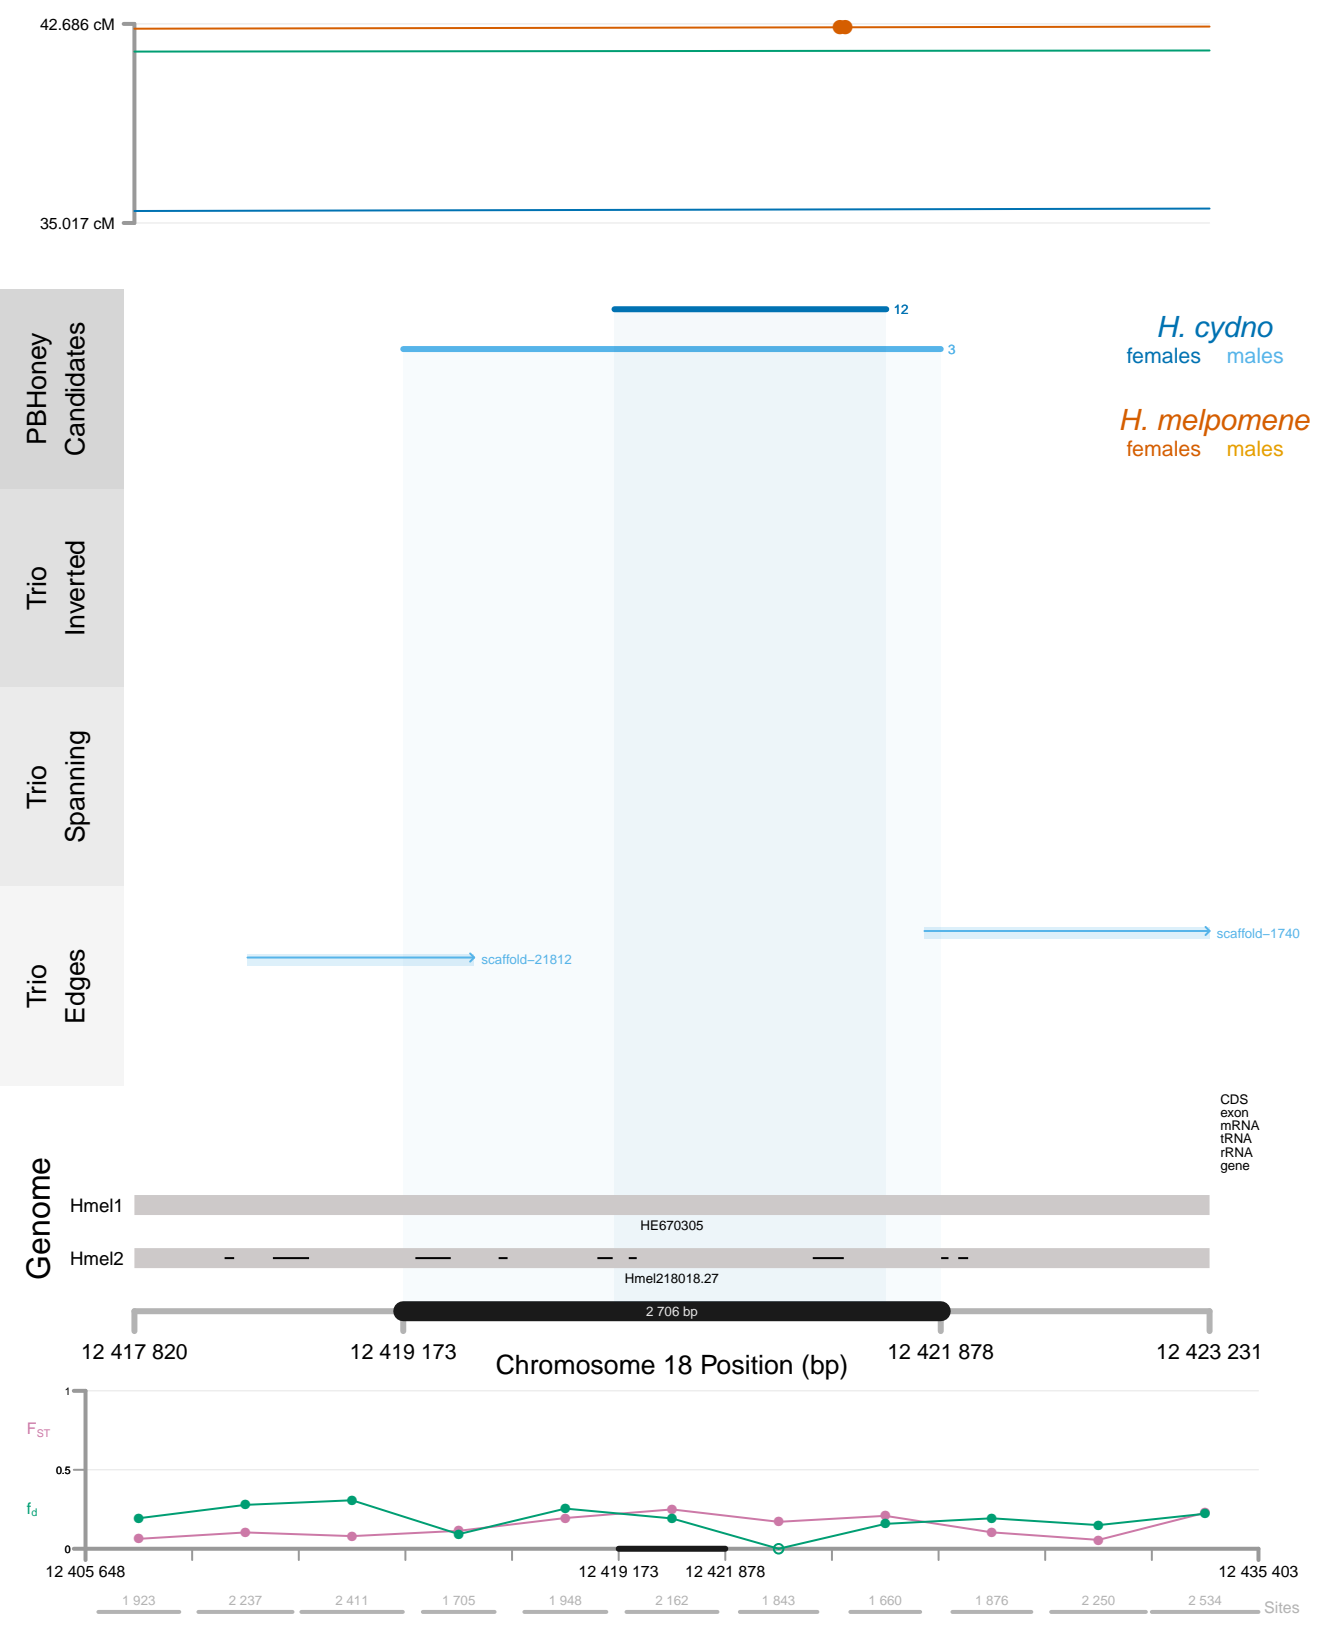

Figure S9.27

*H. cydno*

Split reads only

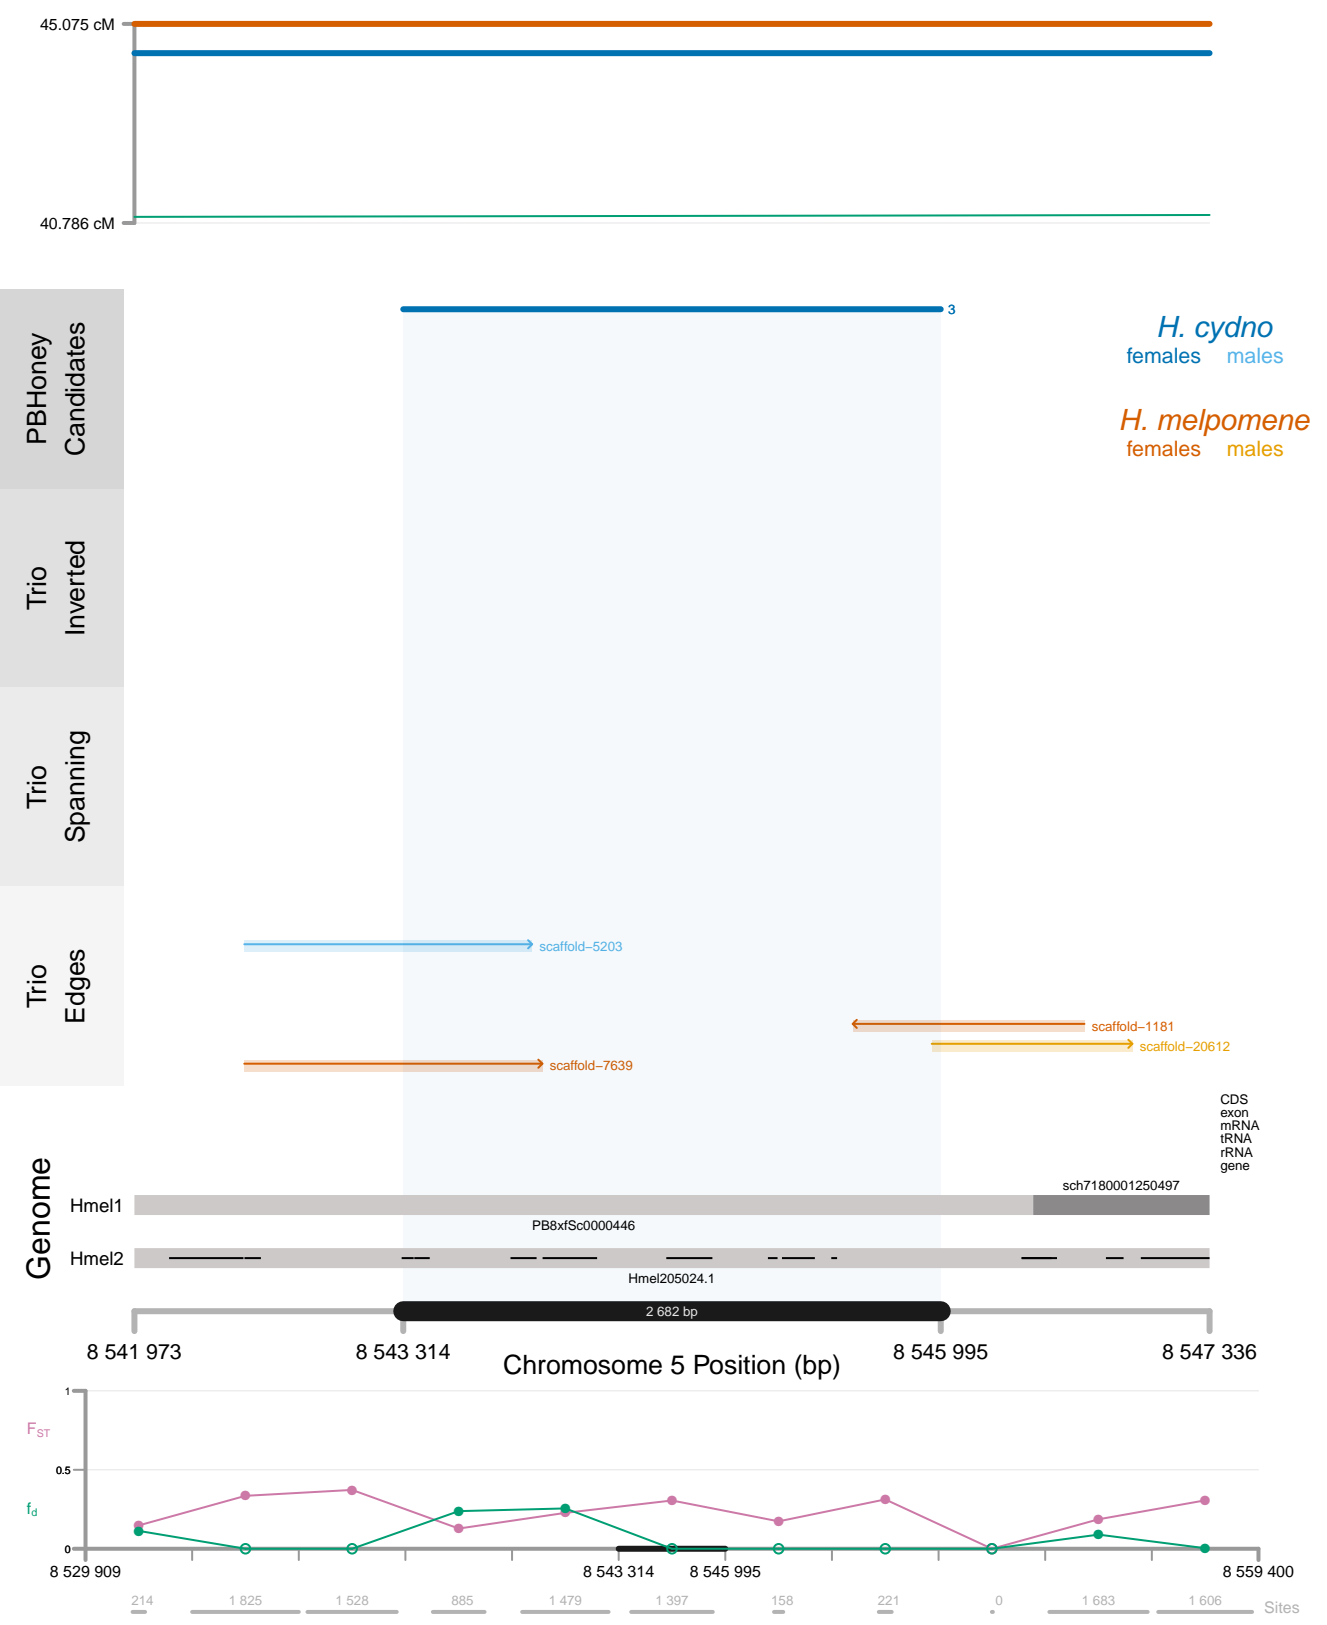

Figure S9.28

*H. cydno*

Split reads only

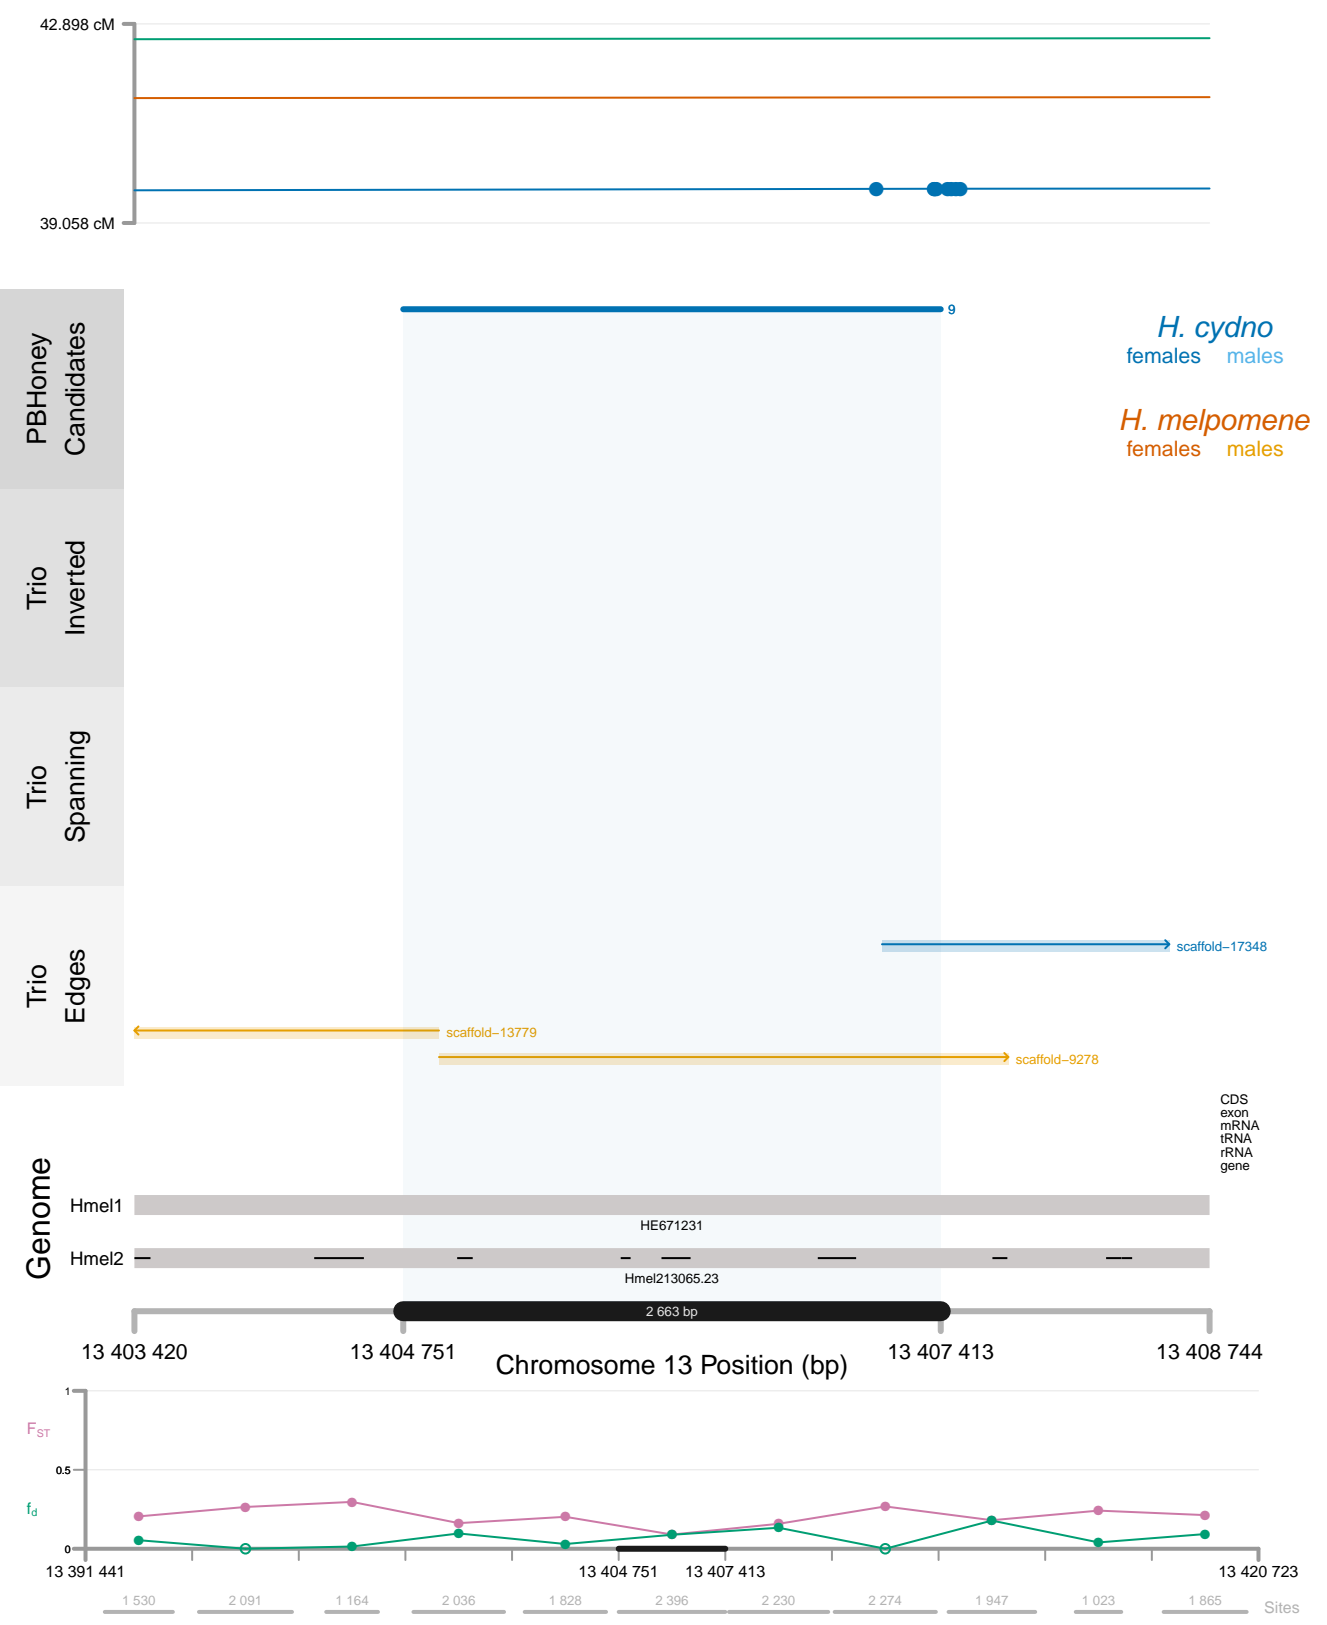

Figure S9.29

*H. cydno*

Split reads only

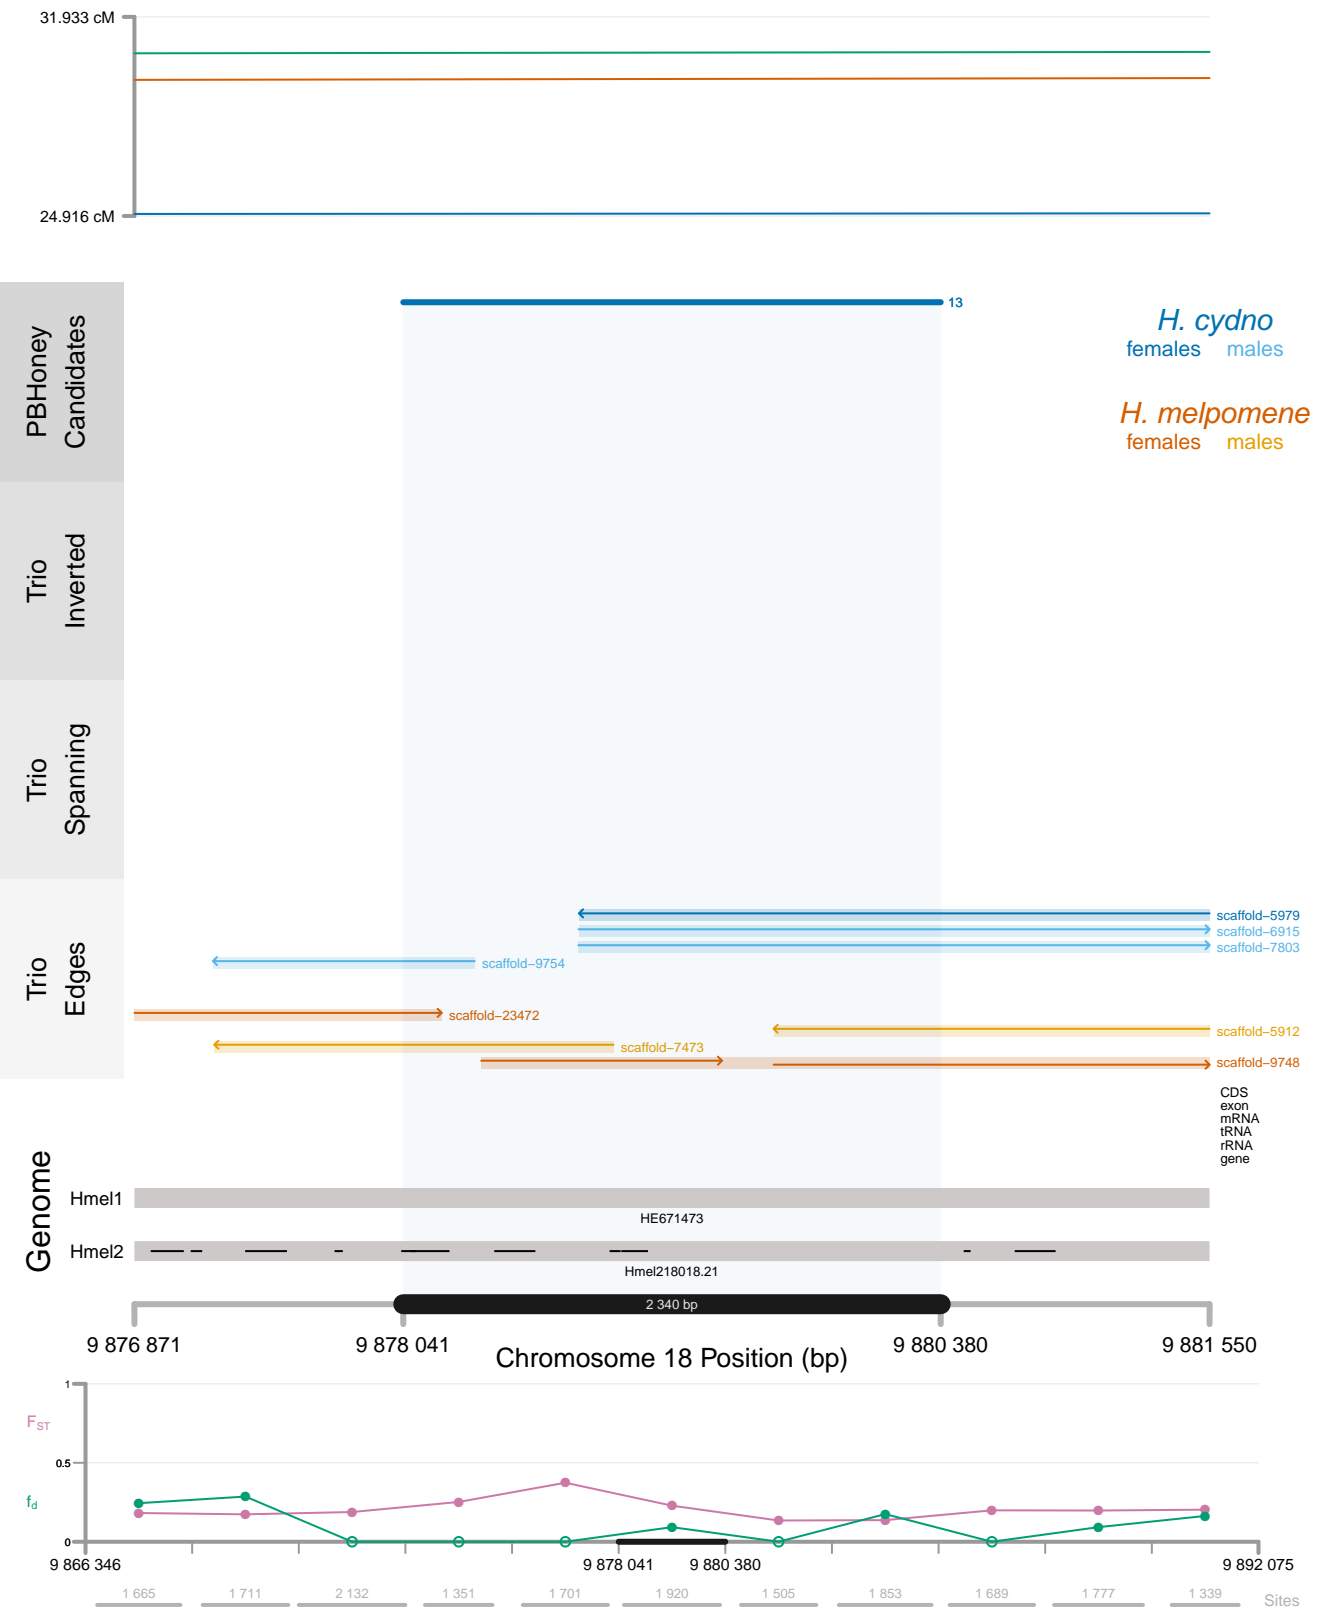

Figure S9.30

*H. cydno*

Split reads only

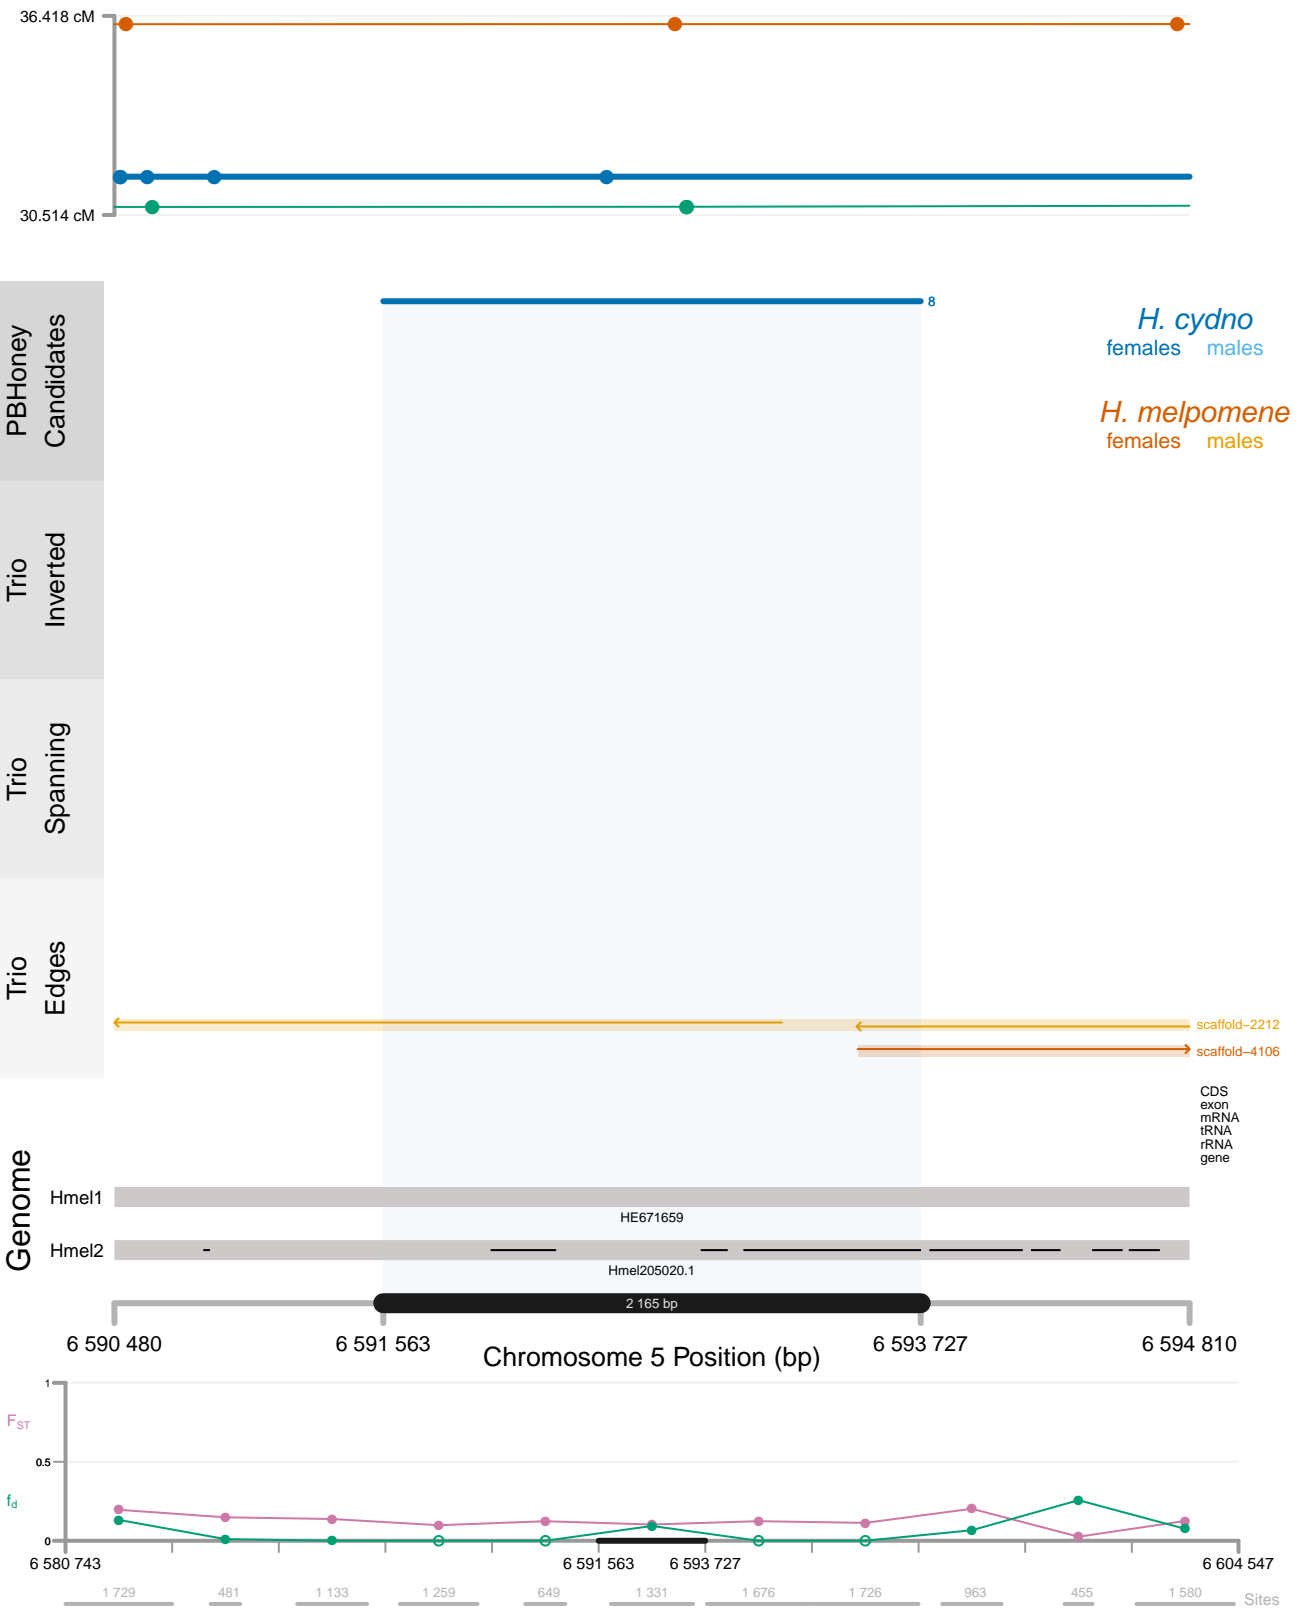

Figure S9.31

*H. cydno*

Split reads only

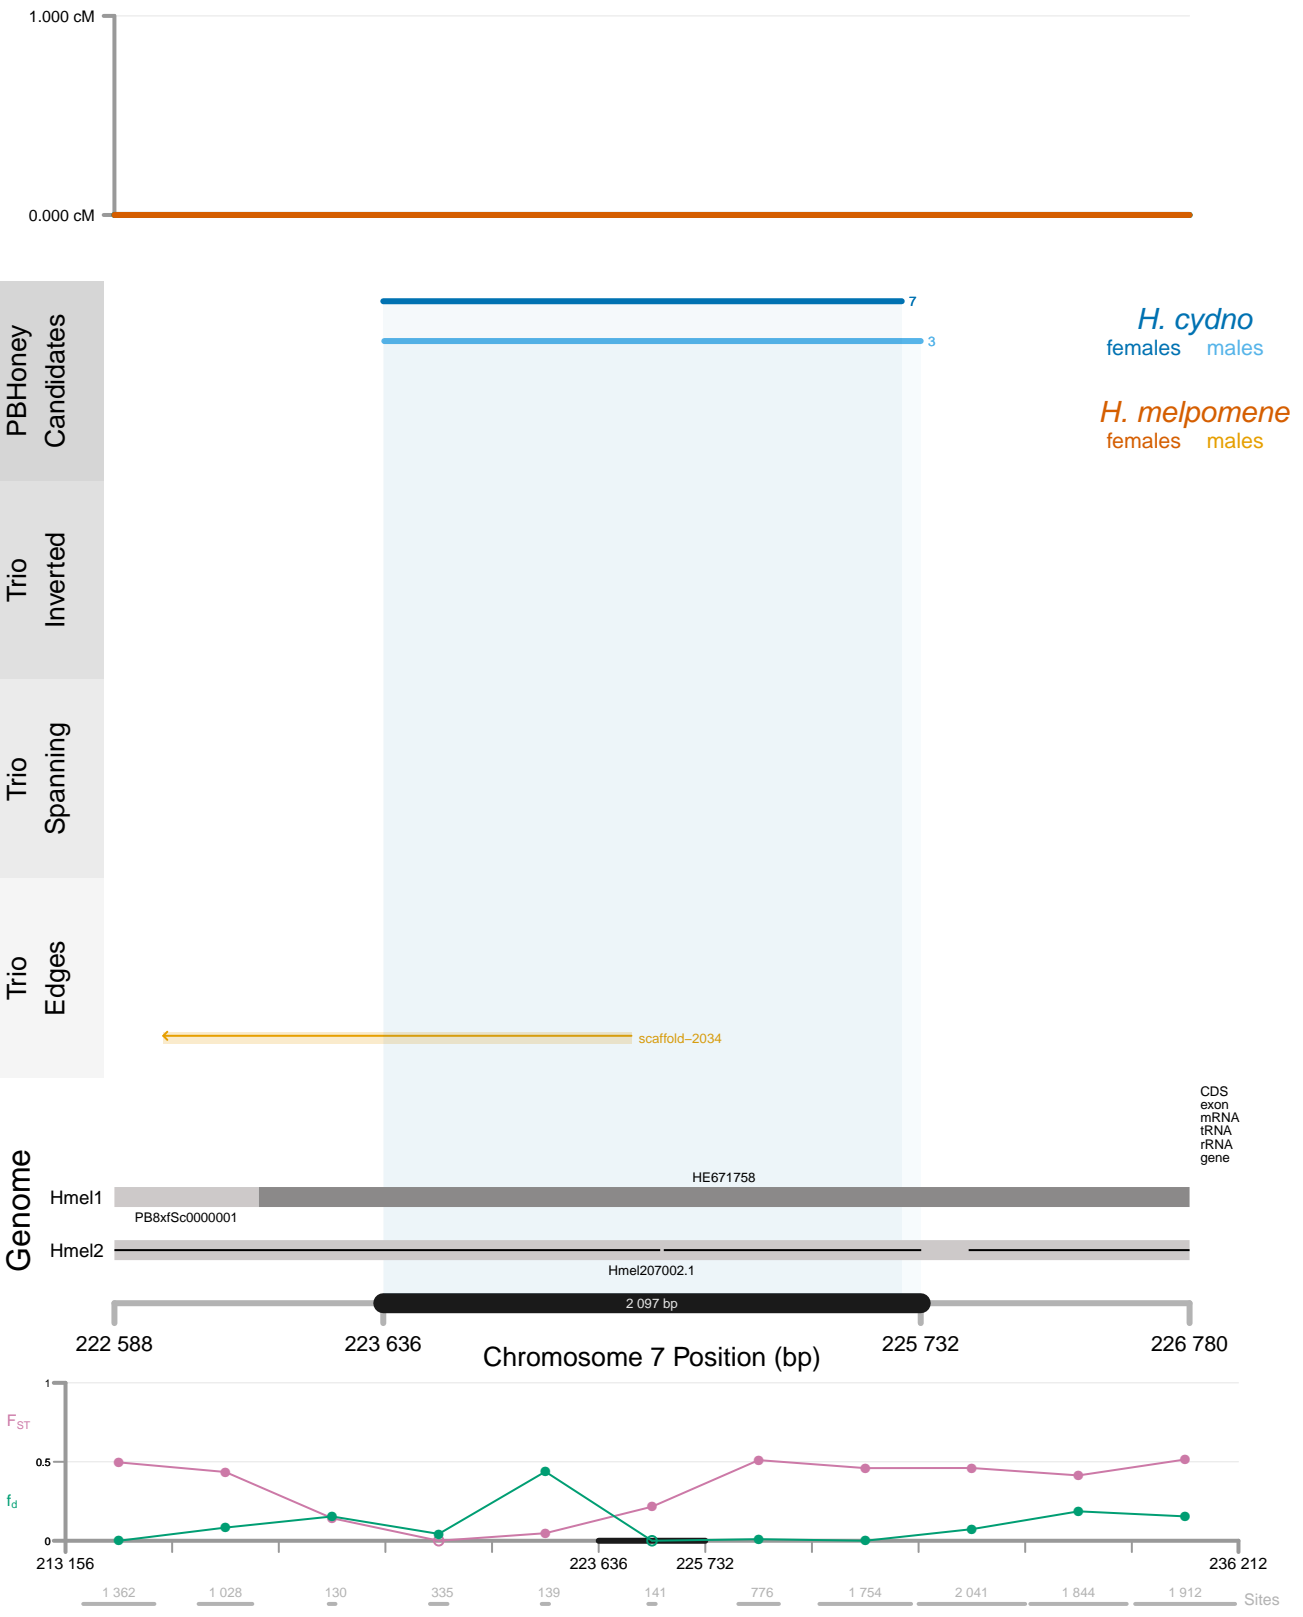

Figure S9.32

*H. cydno*

Split reads only

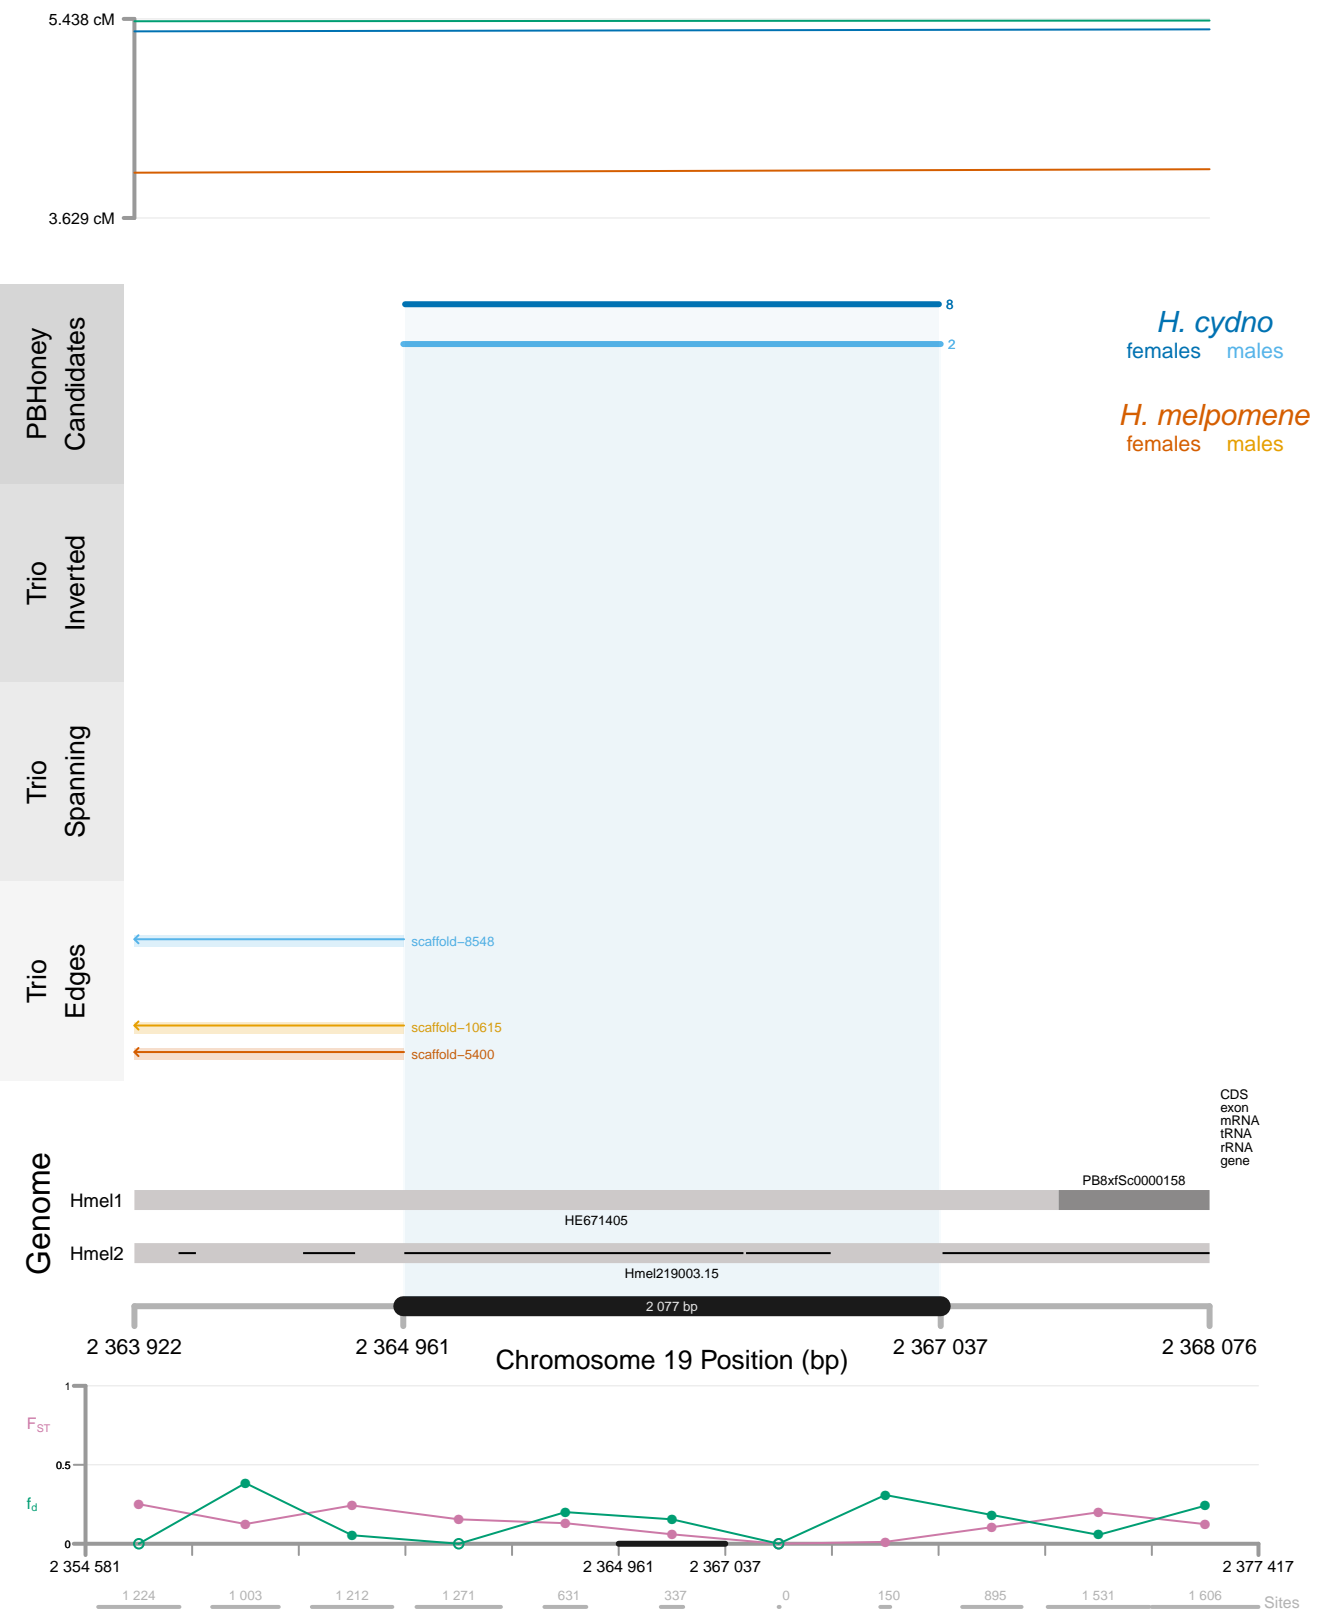



Figure S9.33

*H. cydno*

Split reads only

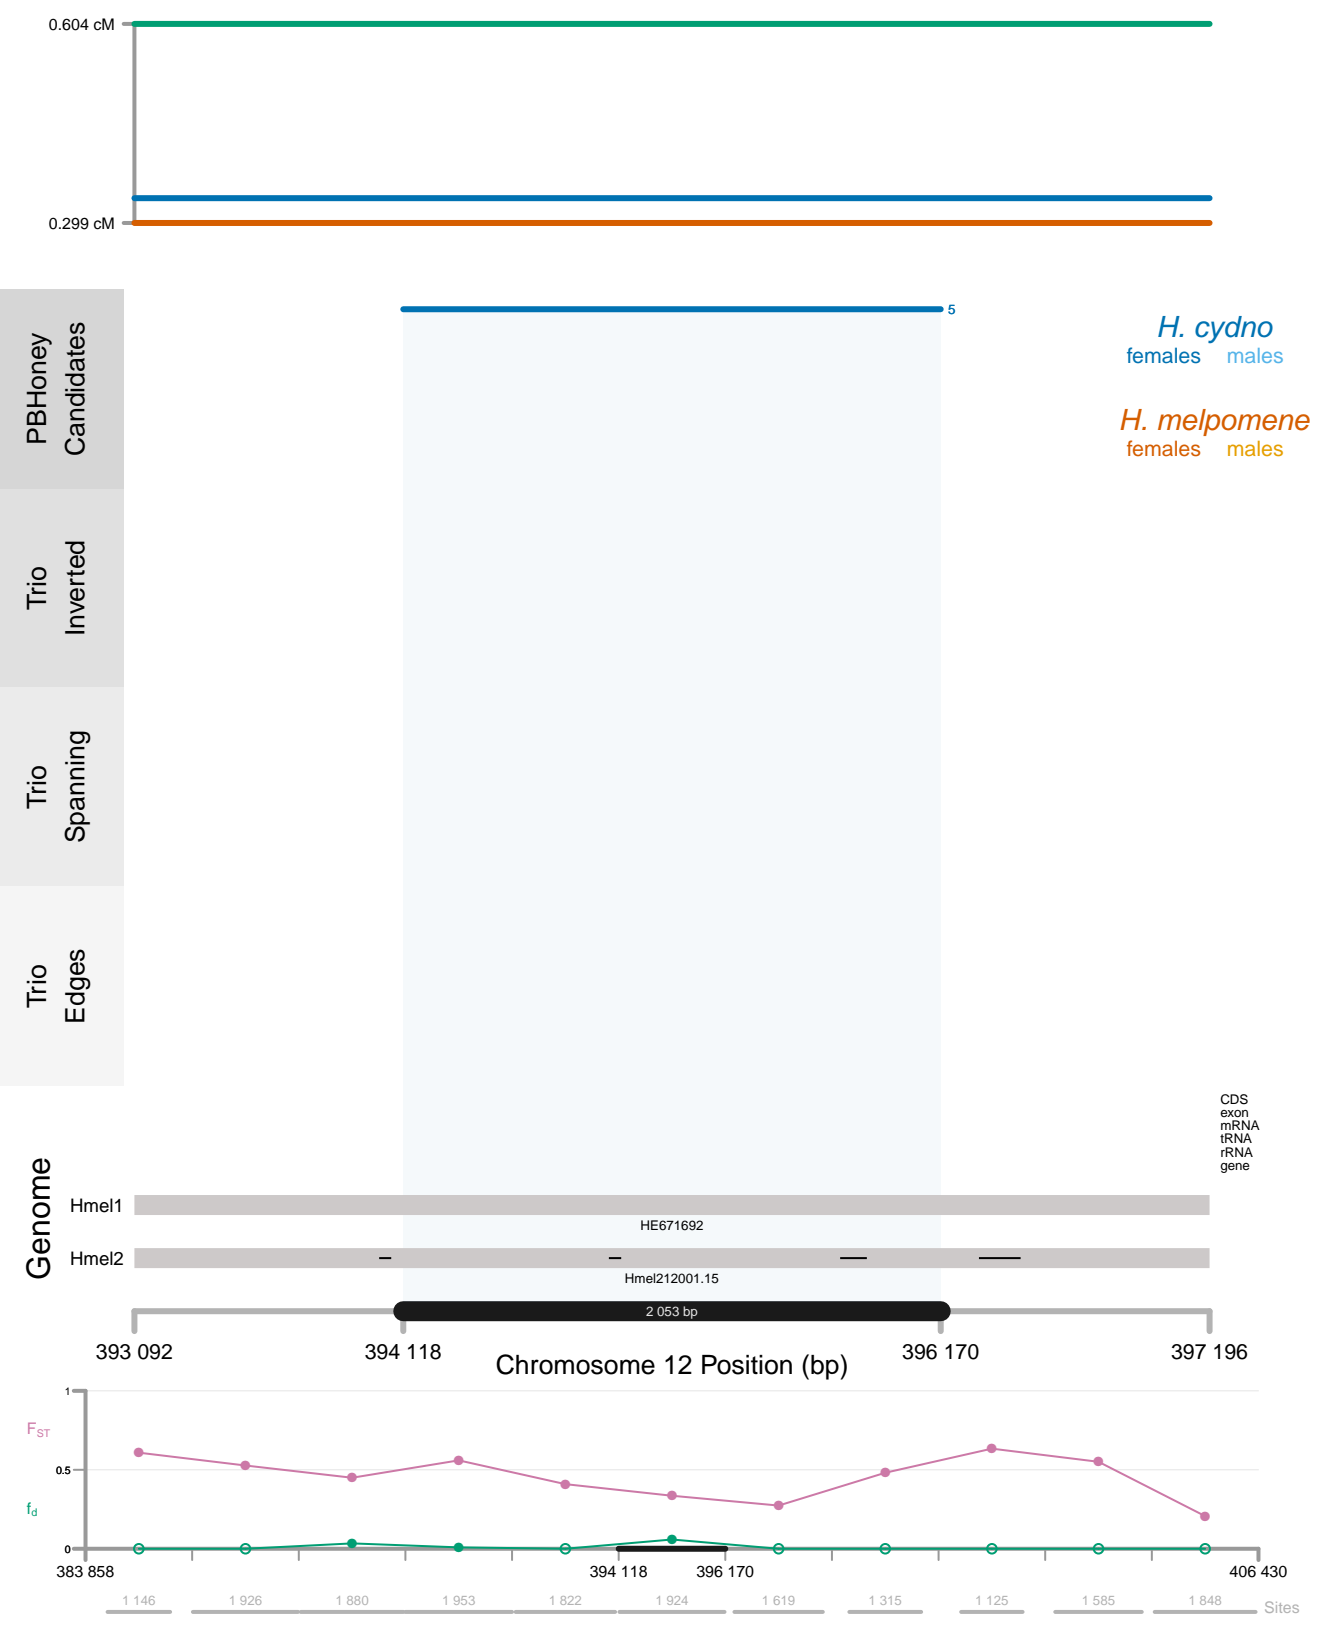

Figure S9.34

*H. cydno*

Split reads only

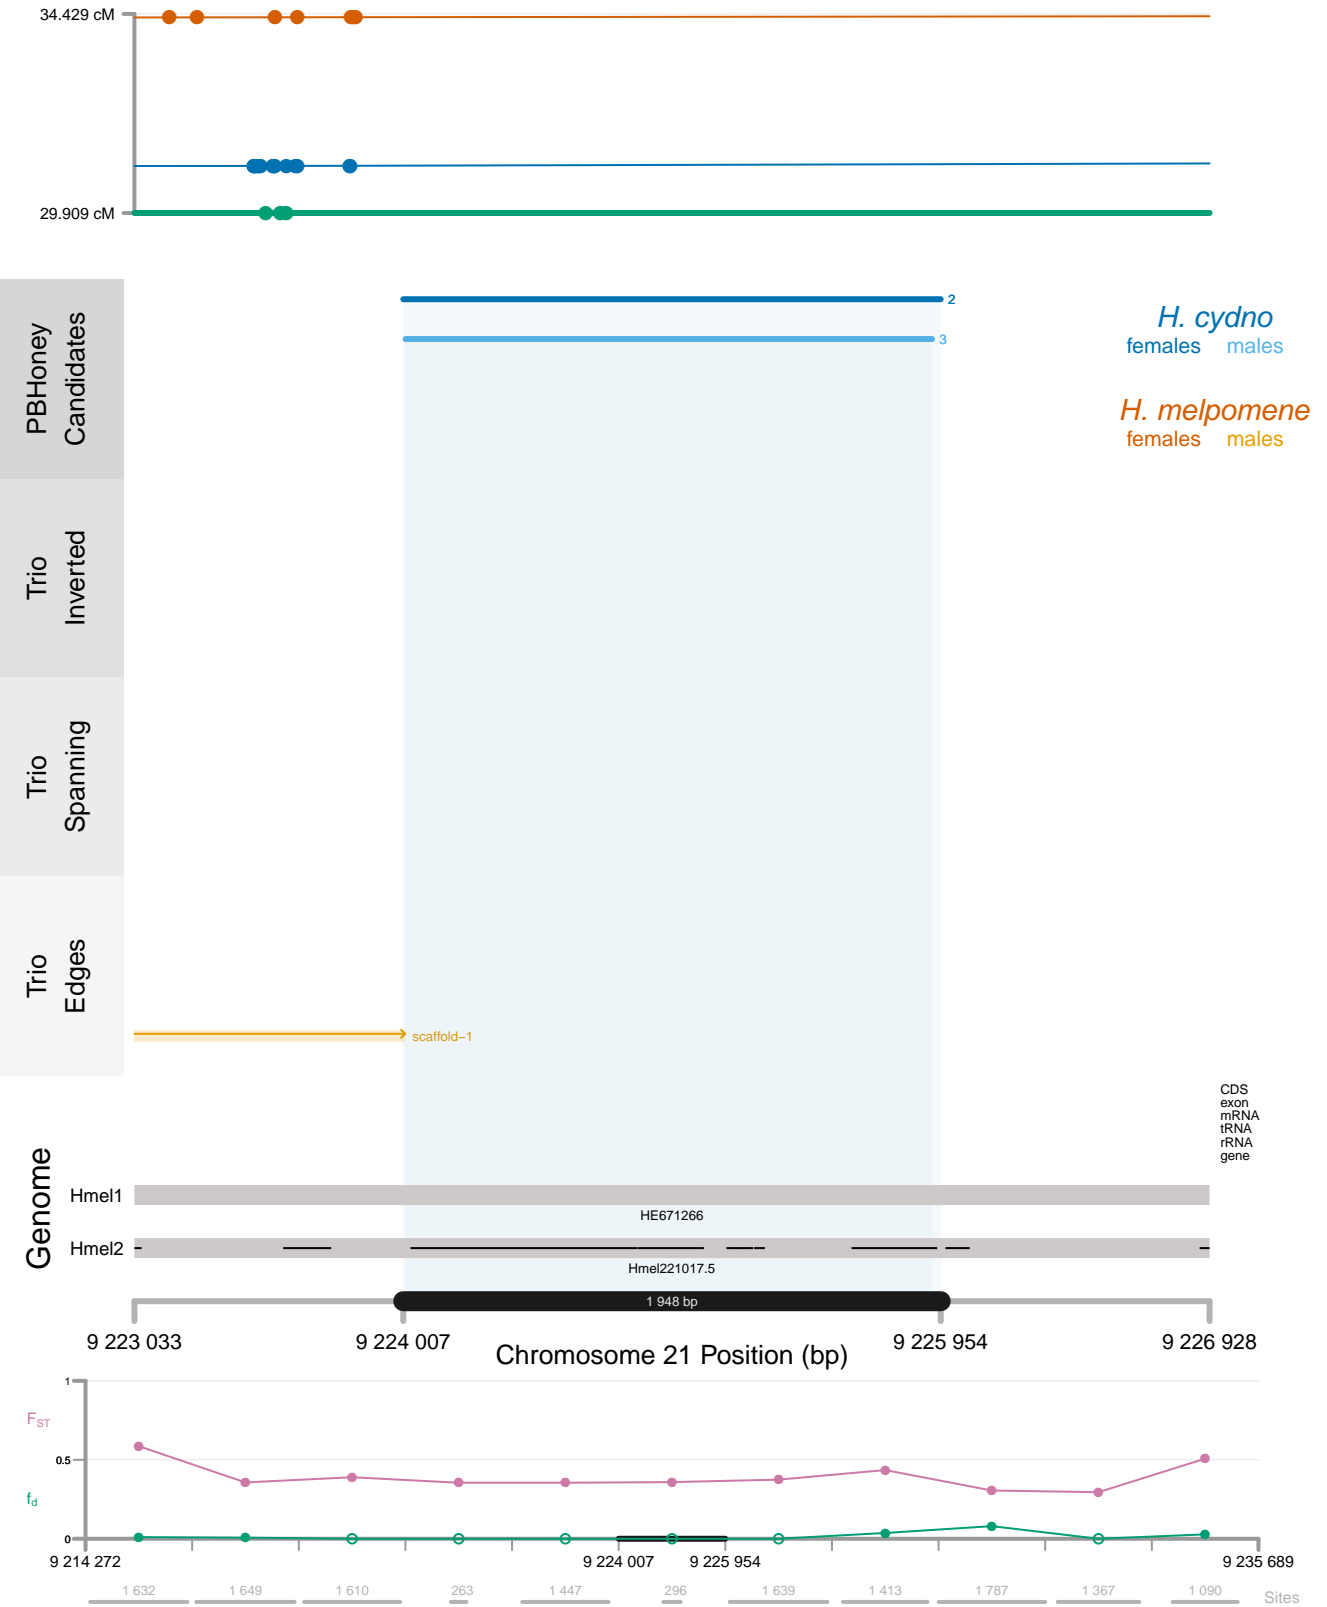

Figure S9.35

*H. cydno*

Split reads only

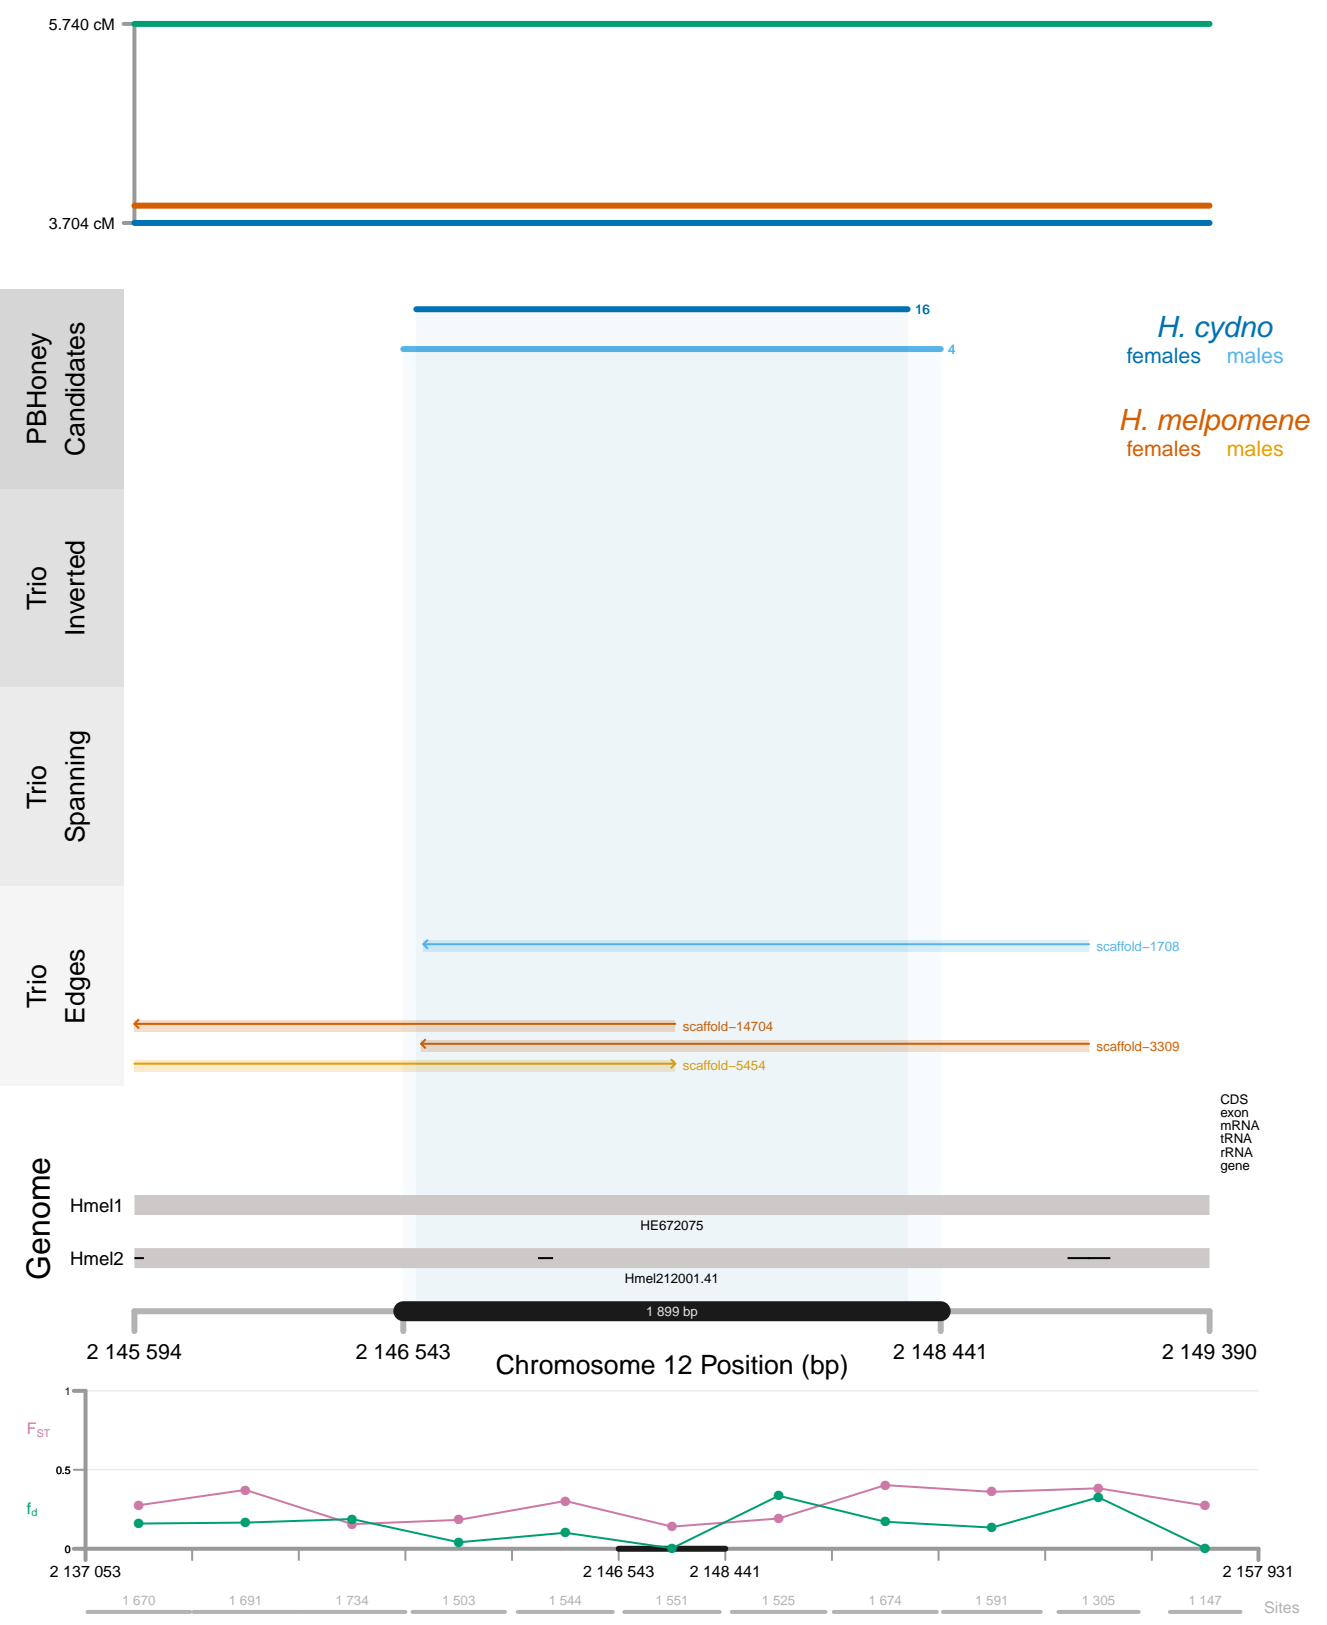

Figure S9.36

*H. cydno*

Split reads only

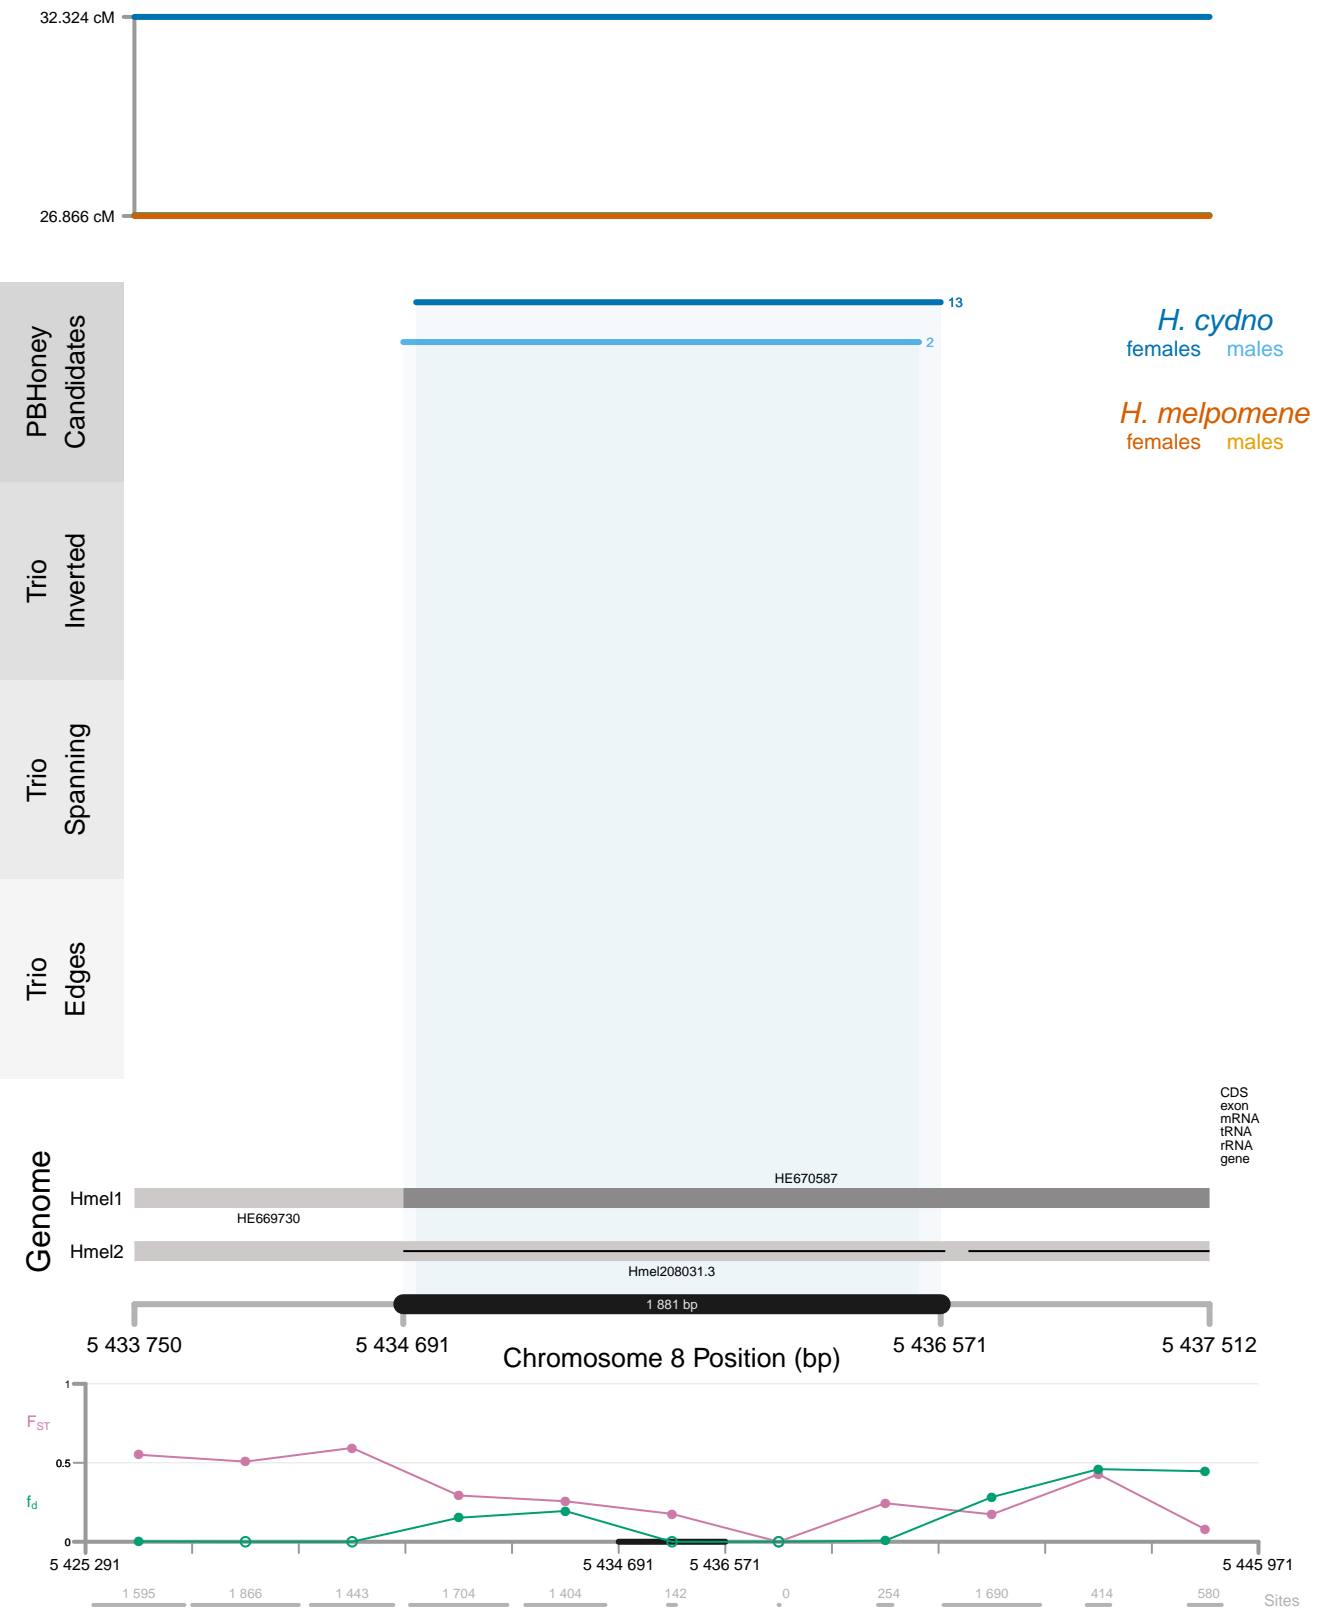

Figure S9.37

*H. cydno*

Split reads only

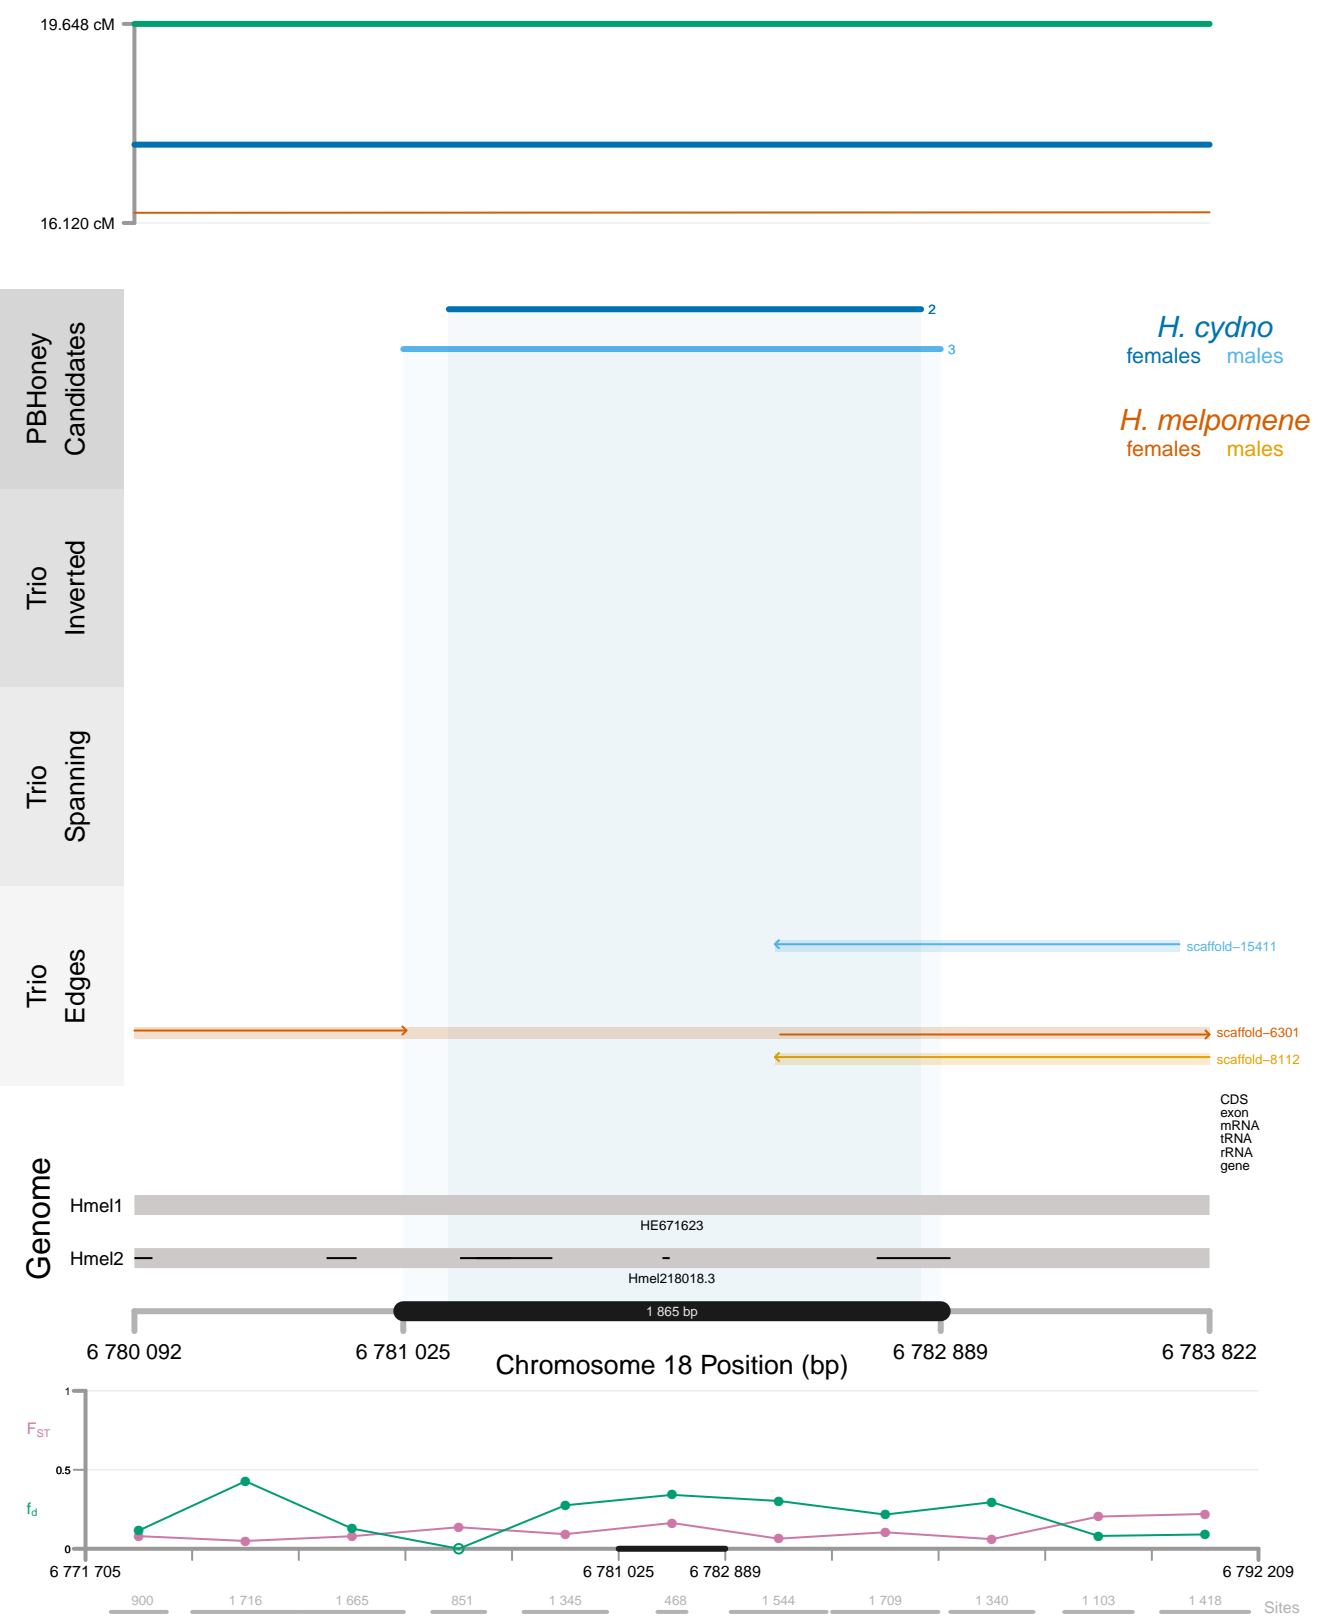

Figure S9.38

*H. cydno*

Split reads only

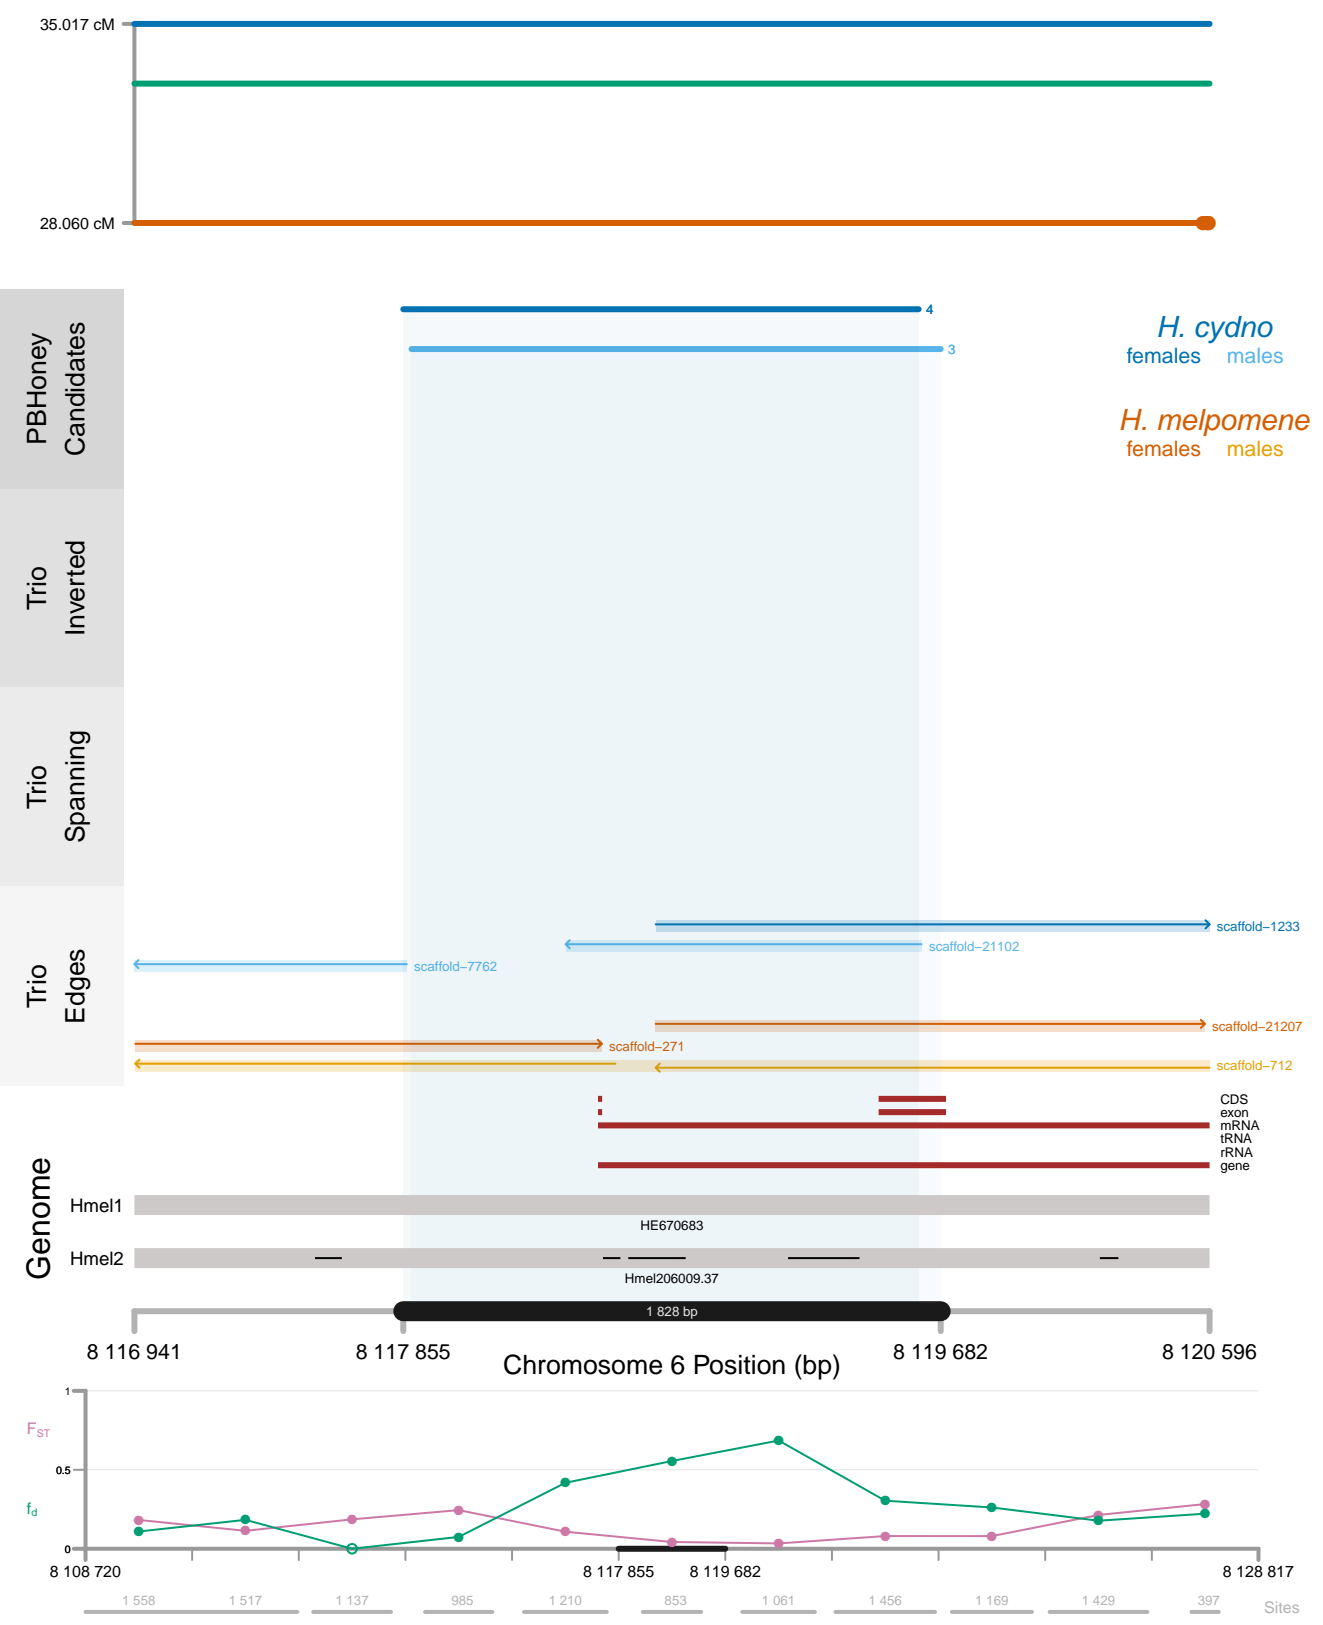

Figure S9.39

*H. cydno*

Split reads only

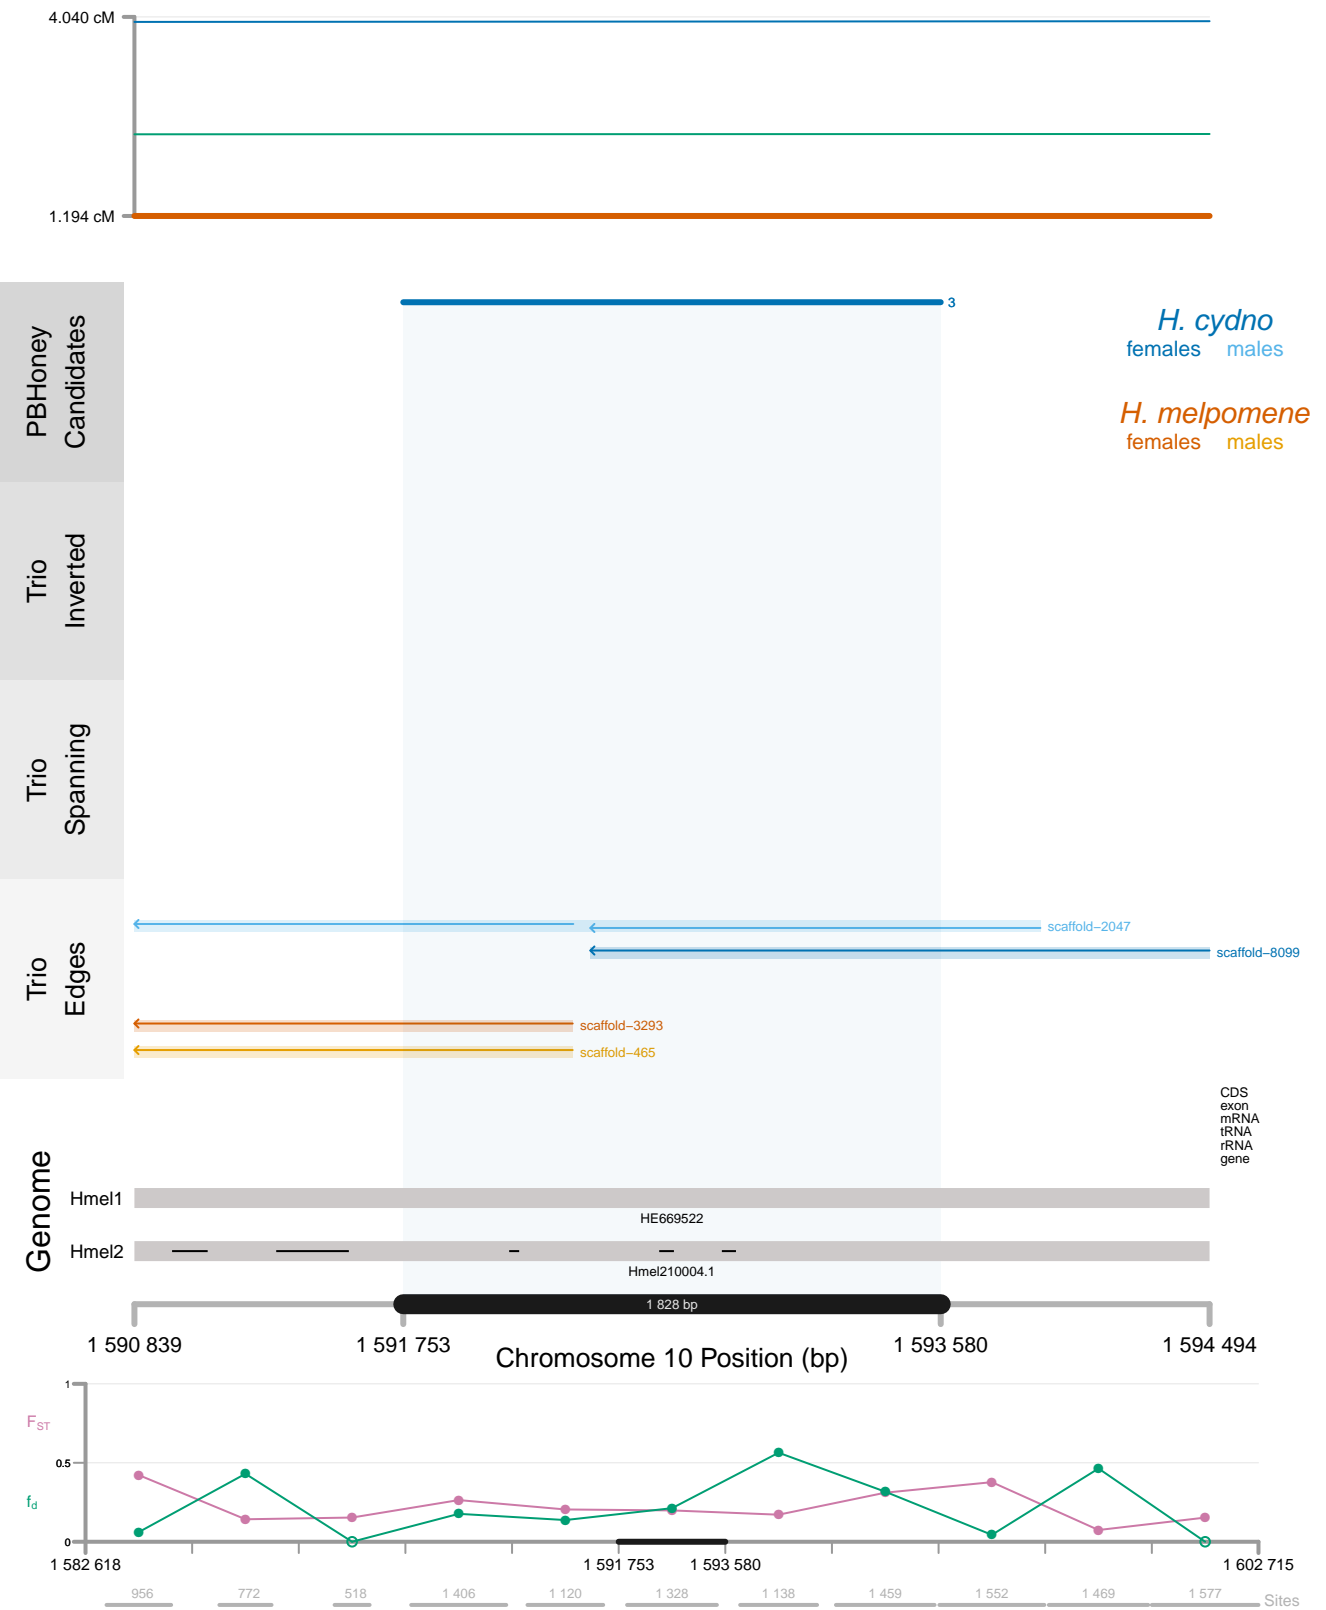

Figure S9.40

*H. cydno*

Split reads only

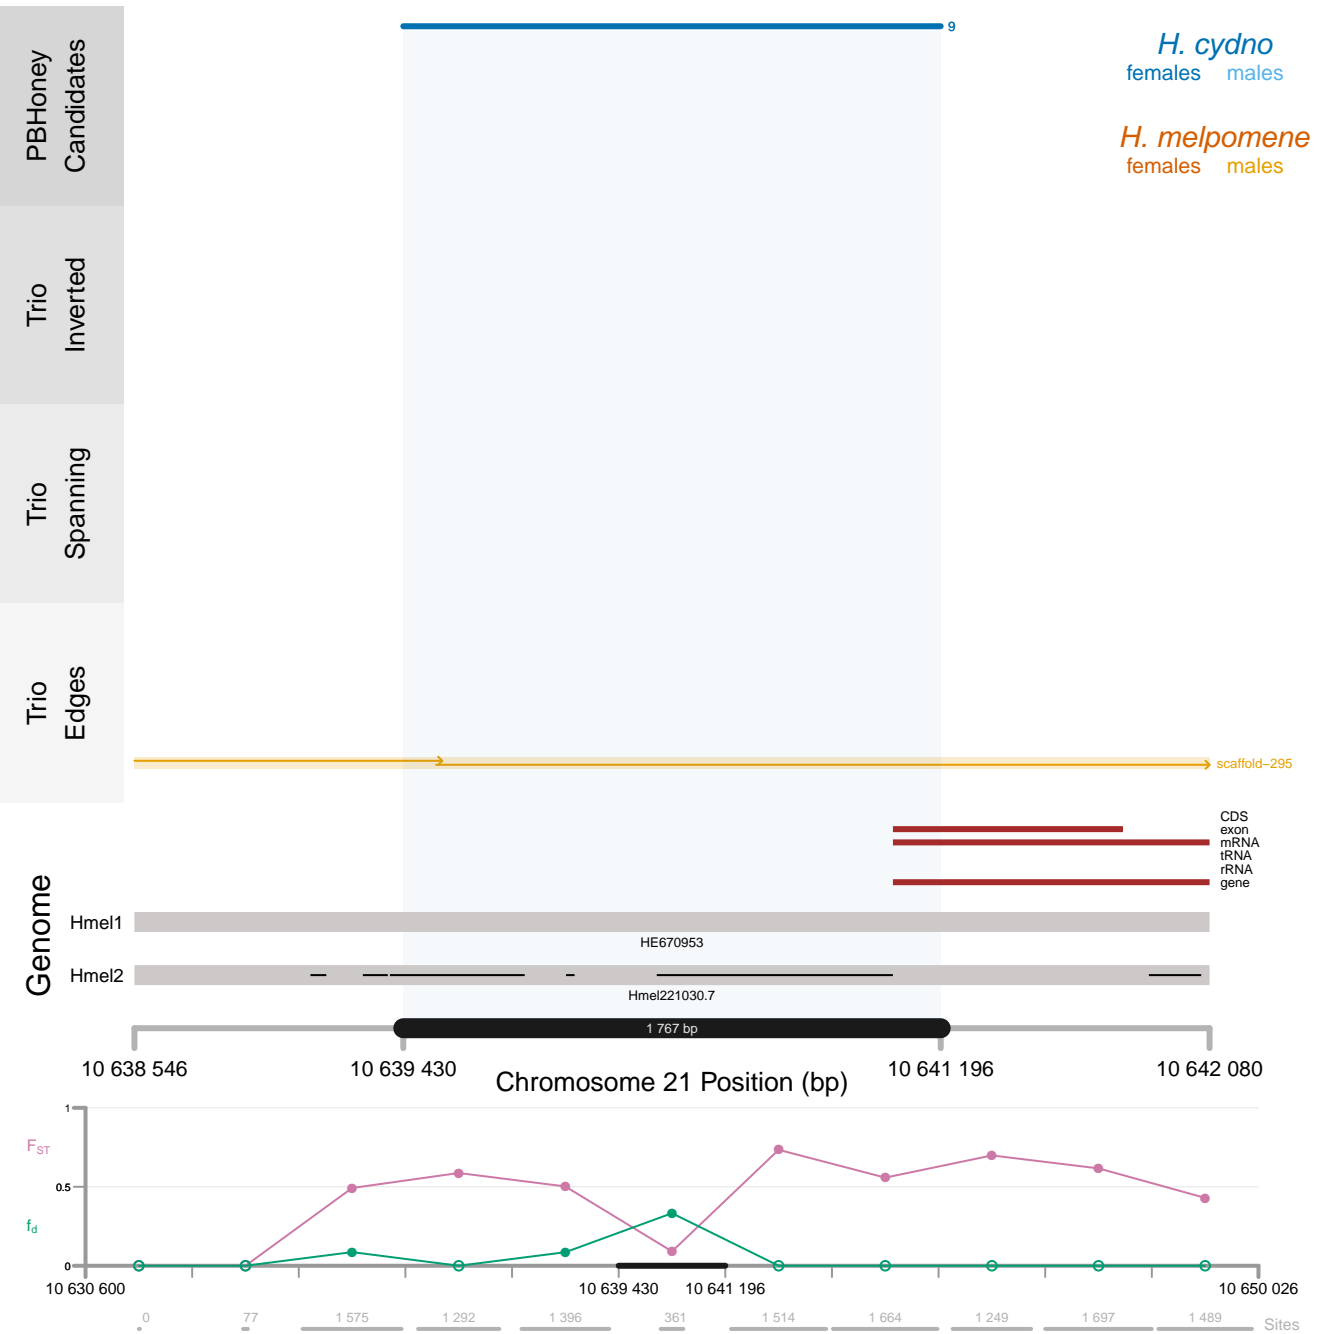



Figure S9.41

*H. cydno*

Split reads only

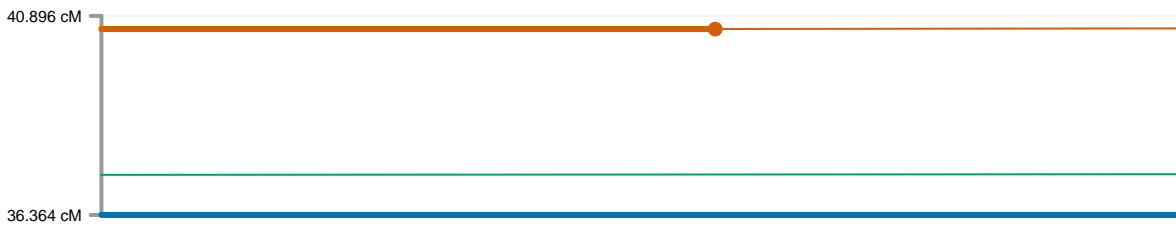

PBHoney Candidates  
 Trio Inverted  
 Trio Spanning  
 Trio Edges

*H. cydno*  
 females males  
*H. melpomene*  
 females males

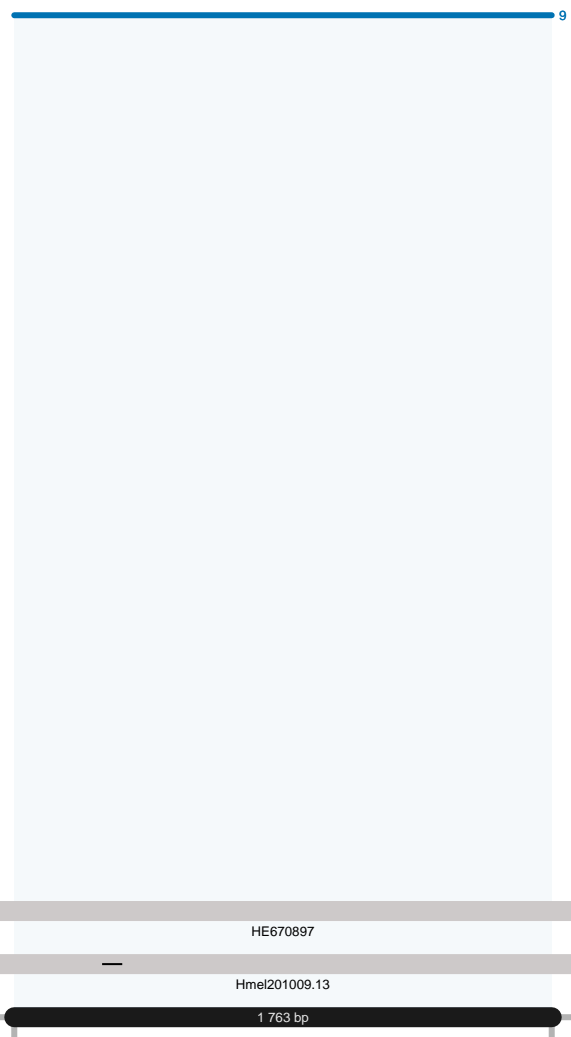

Genome

CDS  
 exon  
 mRNA  
 tRNA  
 rRNA  
 gene

10 794 342      10 795 223      10 796 985      10 797 866  
 Chromosome 1 Position (bp)

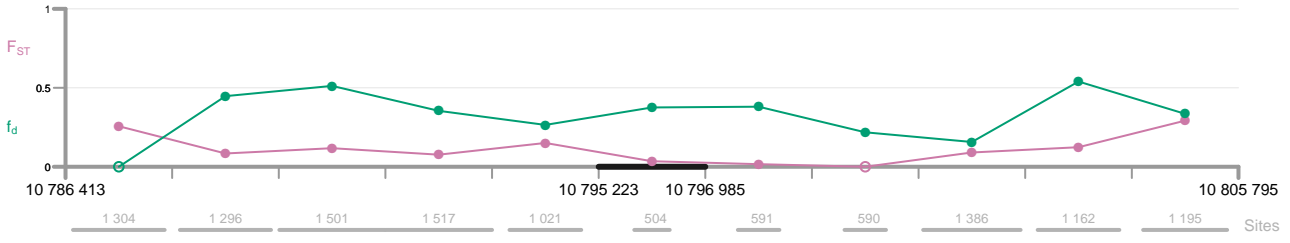

Figure S9.42

*H. cydno*

Split reads only

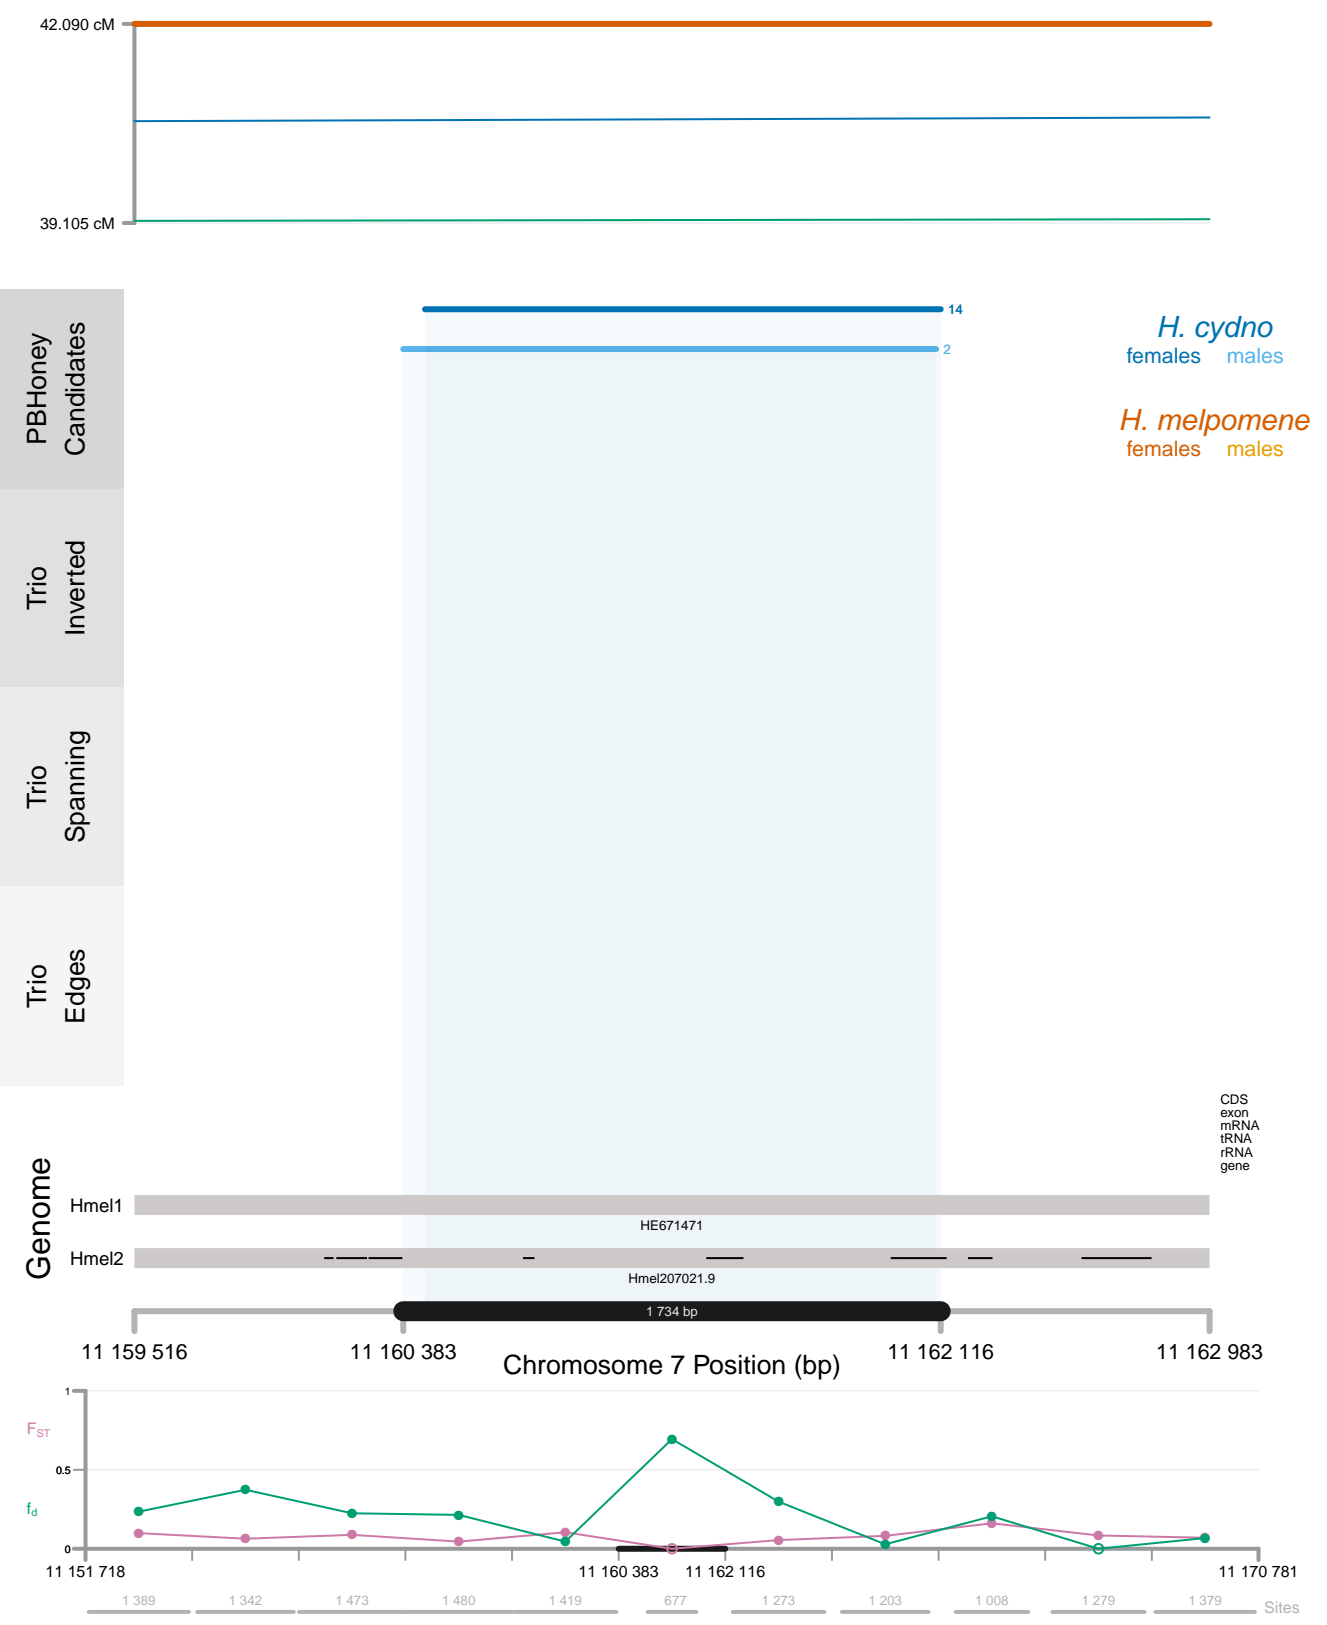

Figure S9.43

*H. cydno*

Split reads only

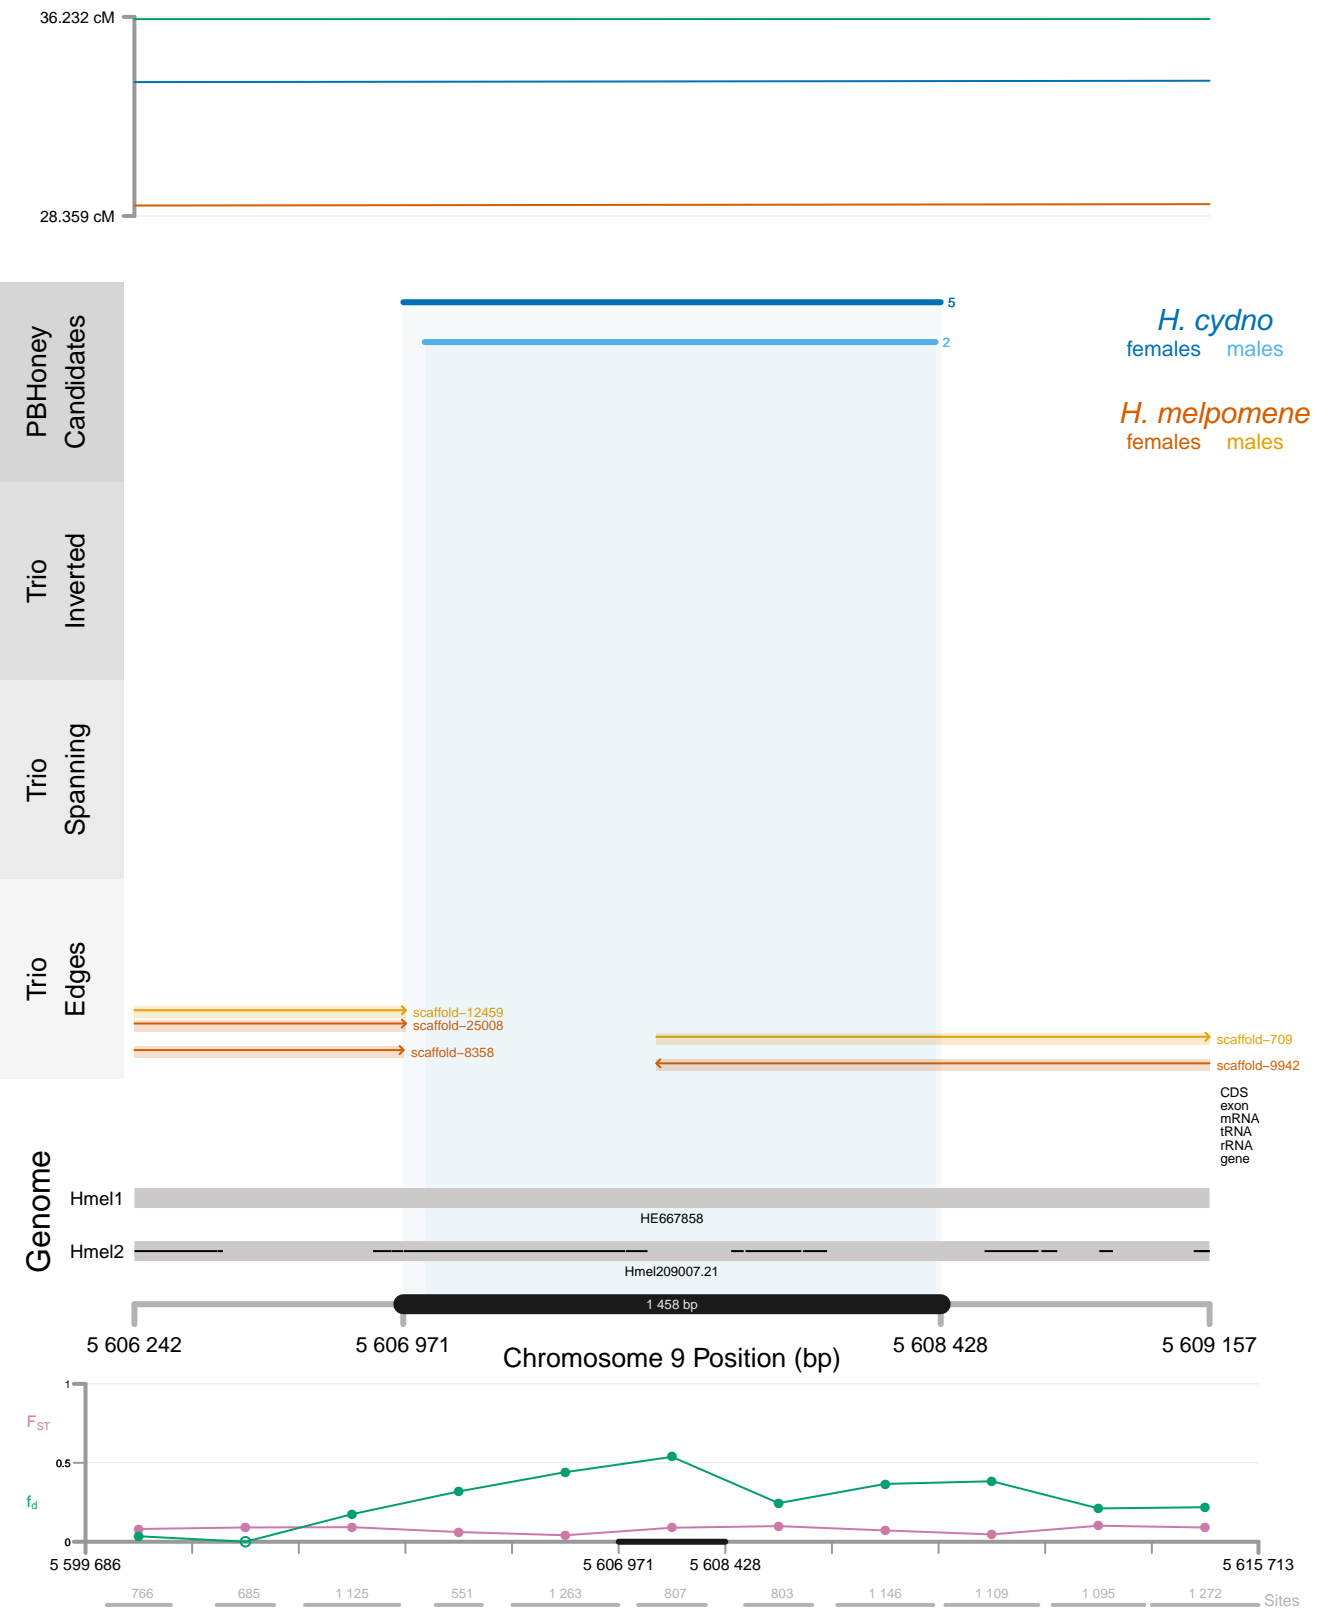

Figure S9.44

*H. cydno*

Split reads only

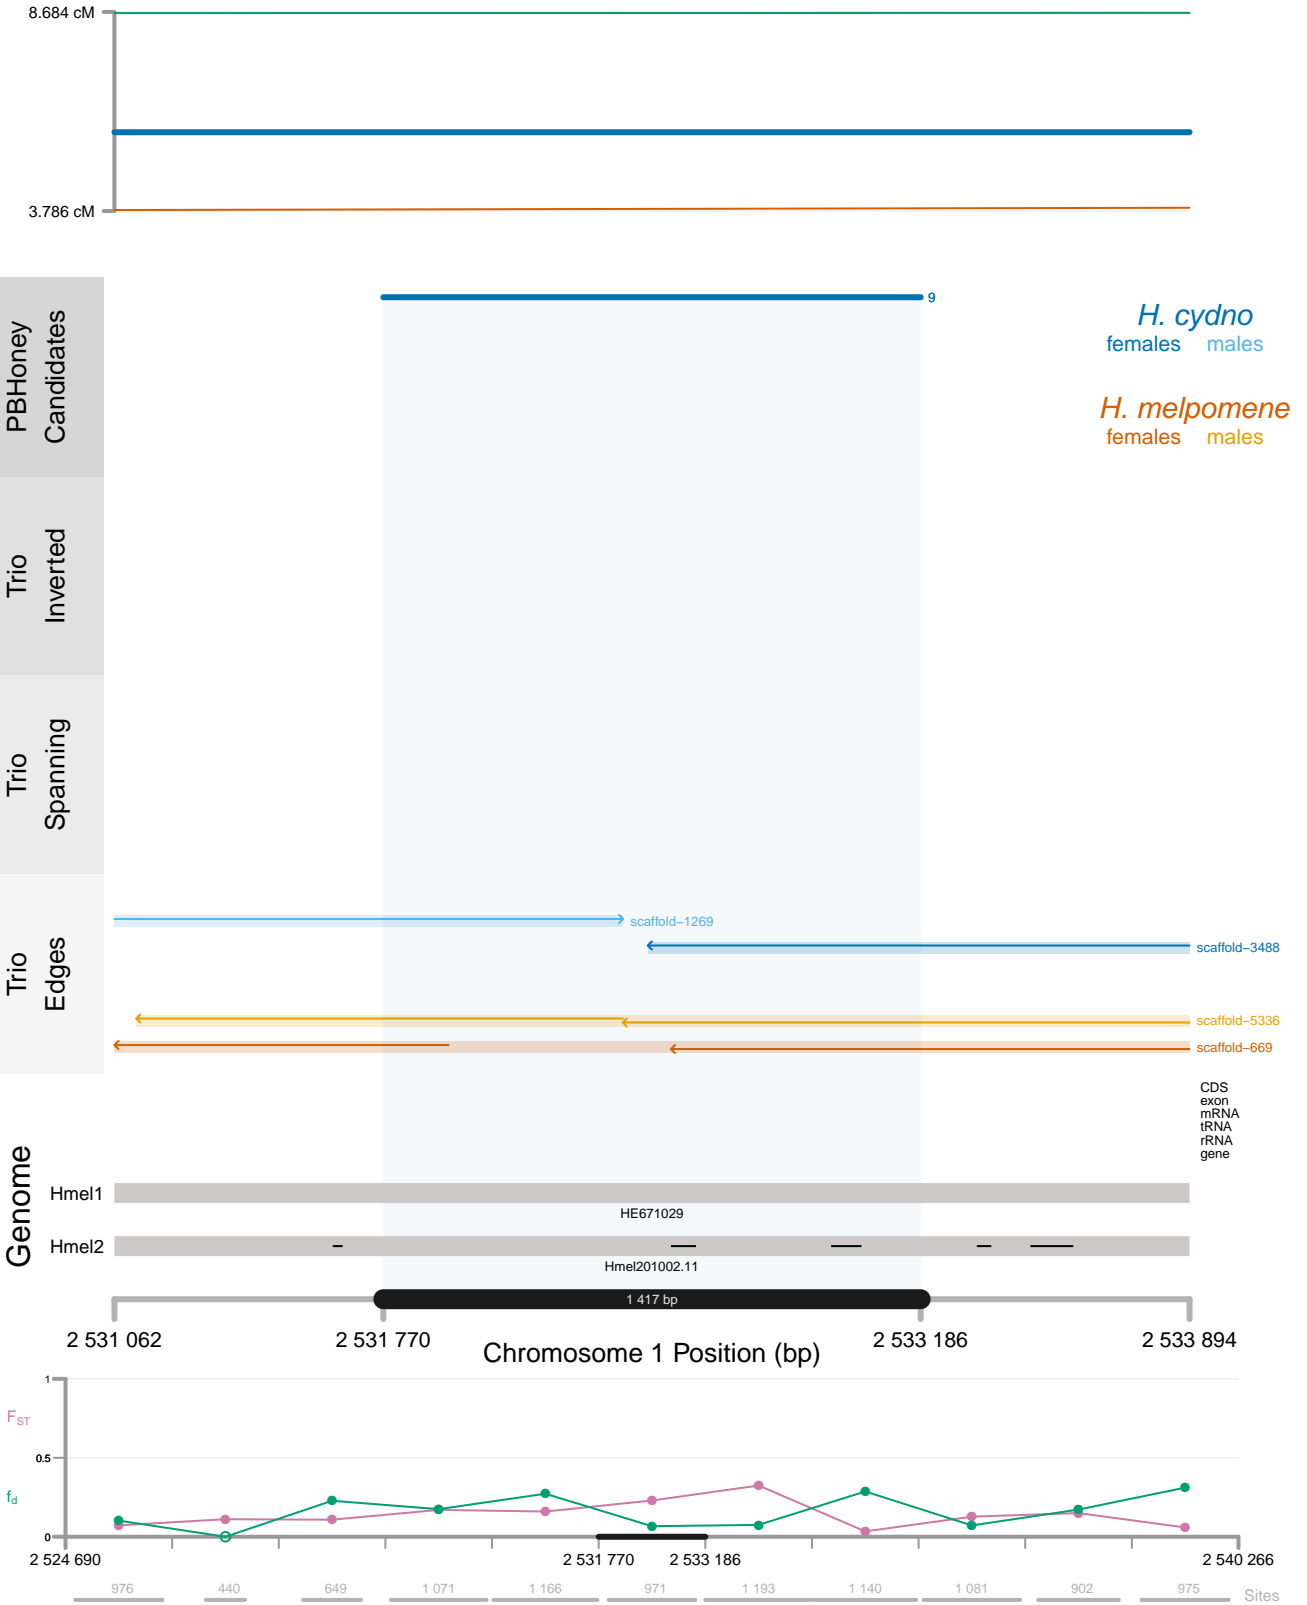

Figure S9.45

*H. cydno*

Split reads only

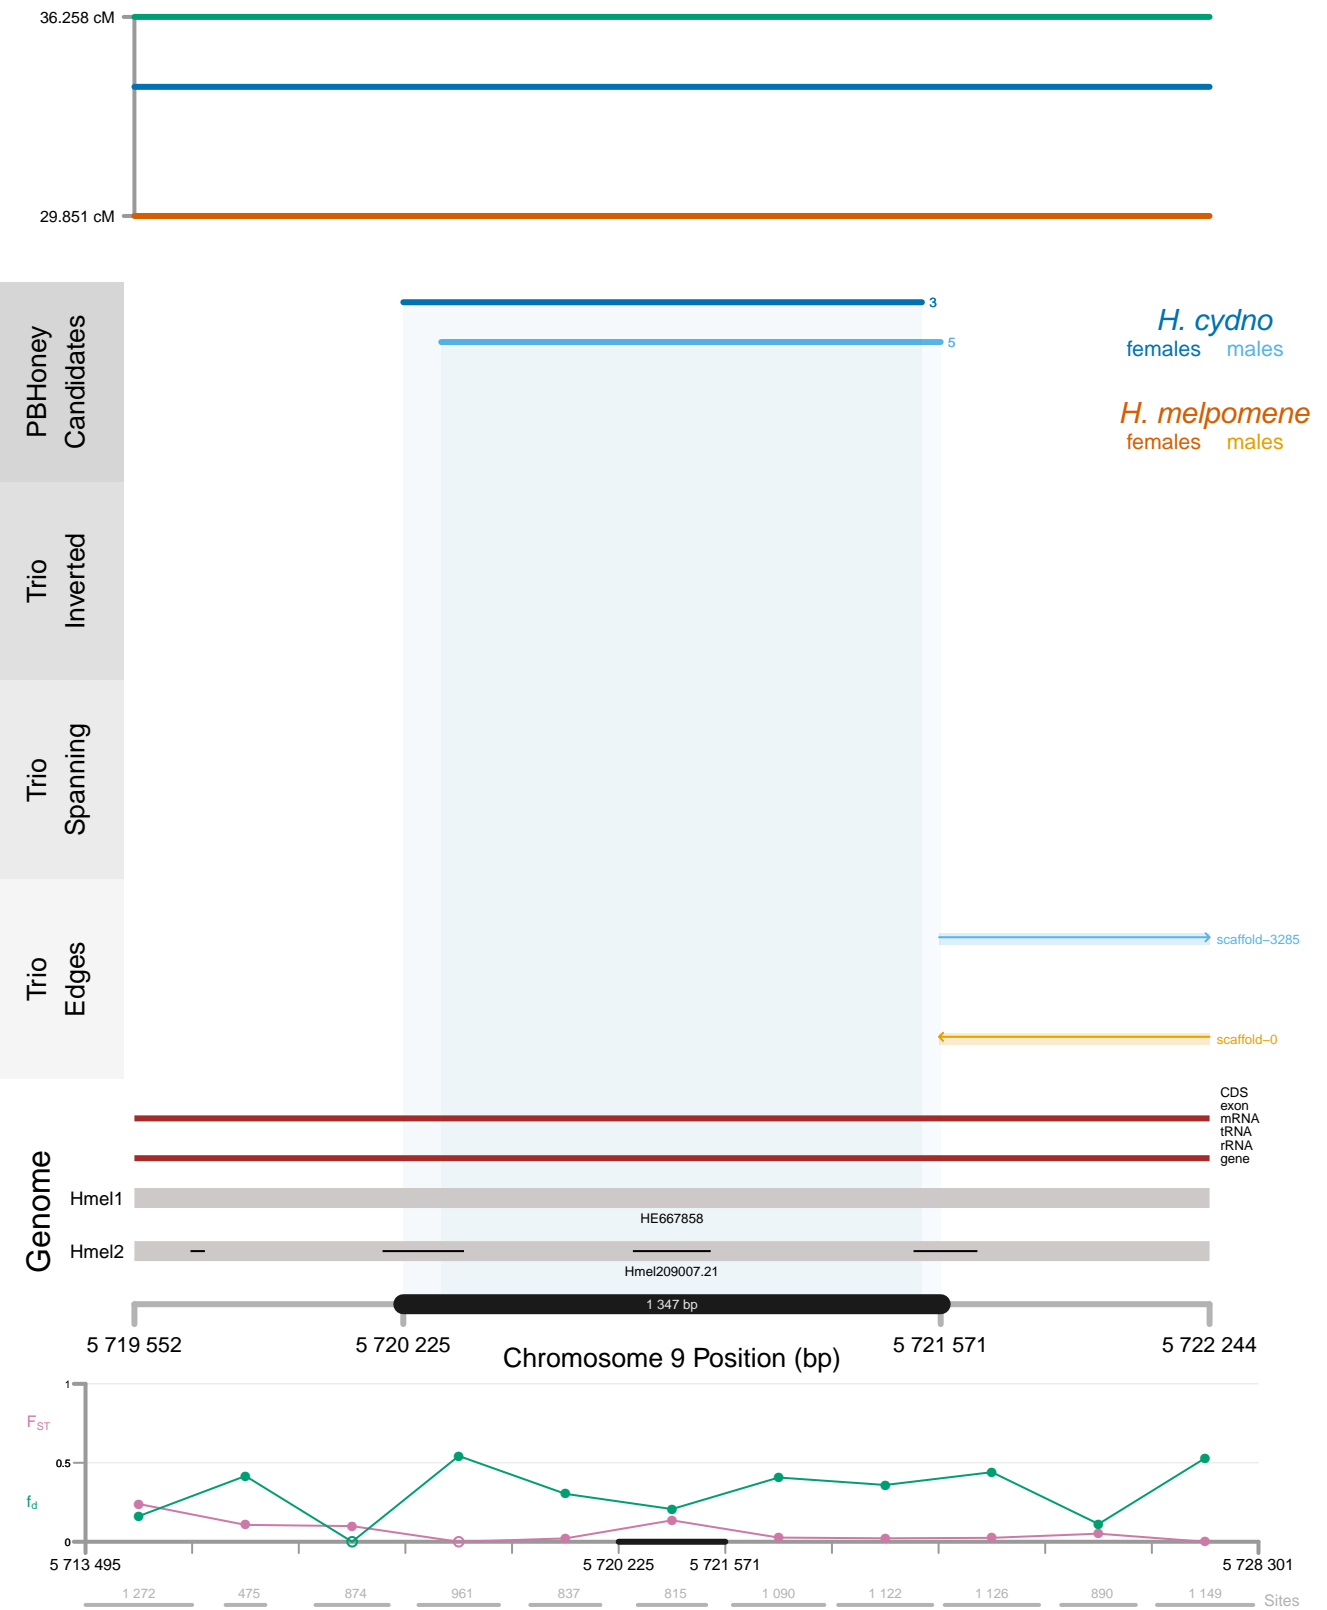

Figure S9.46

*H. cydno*

Split reads only

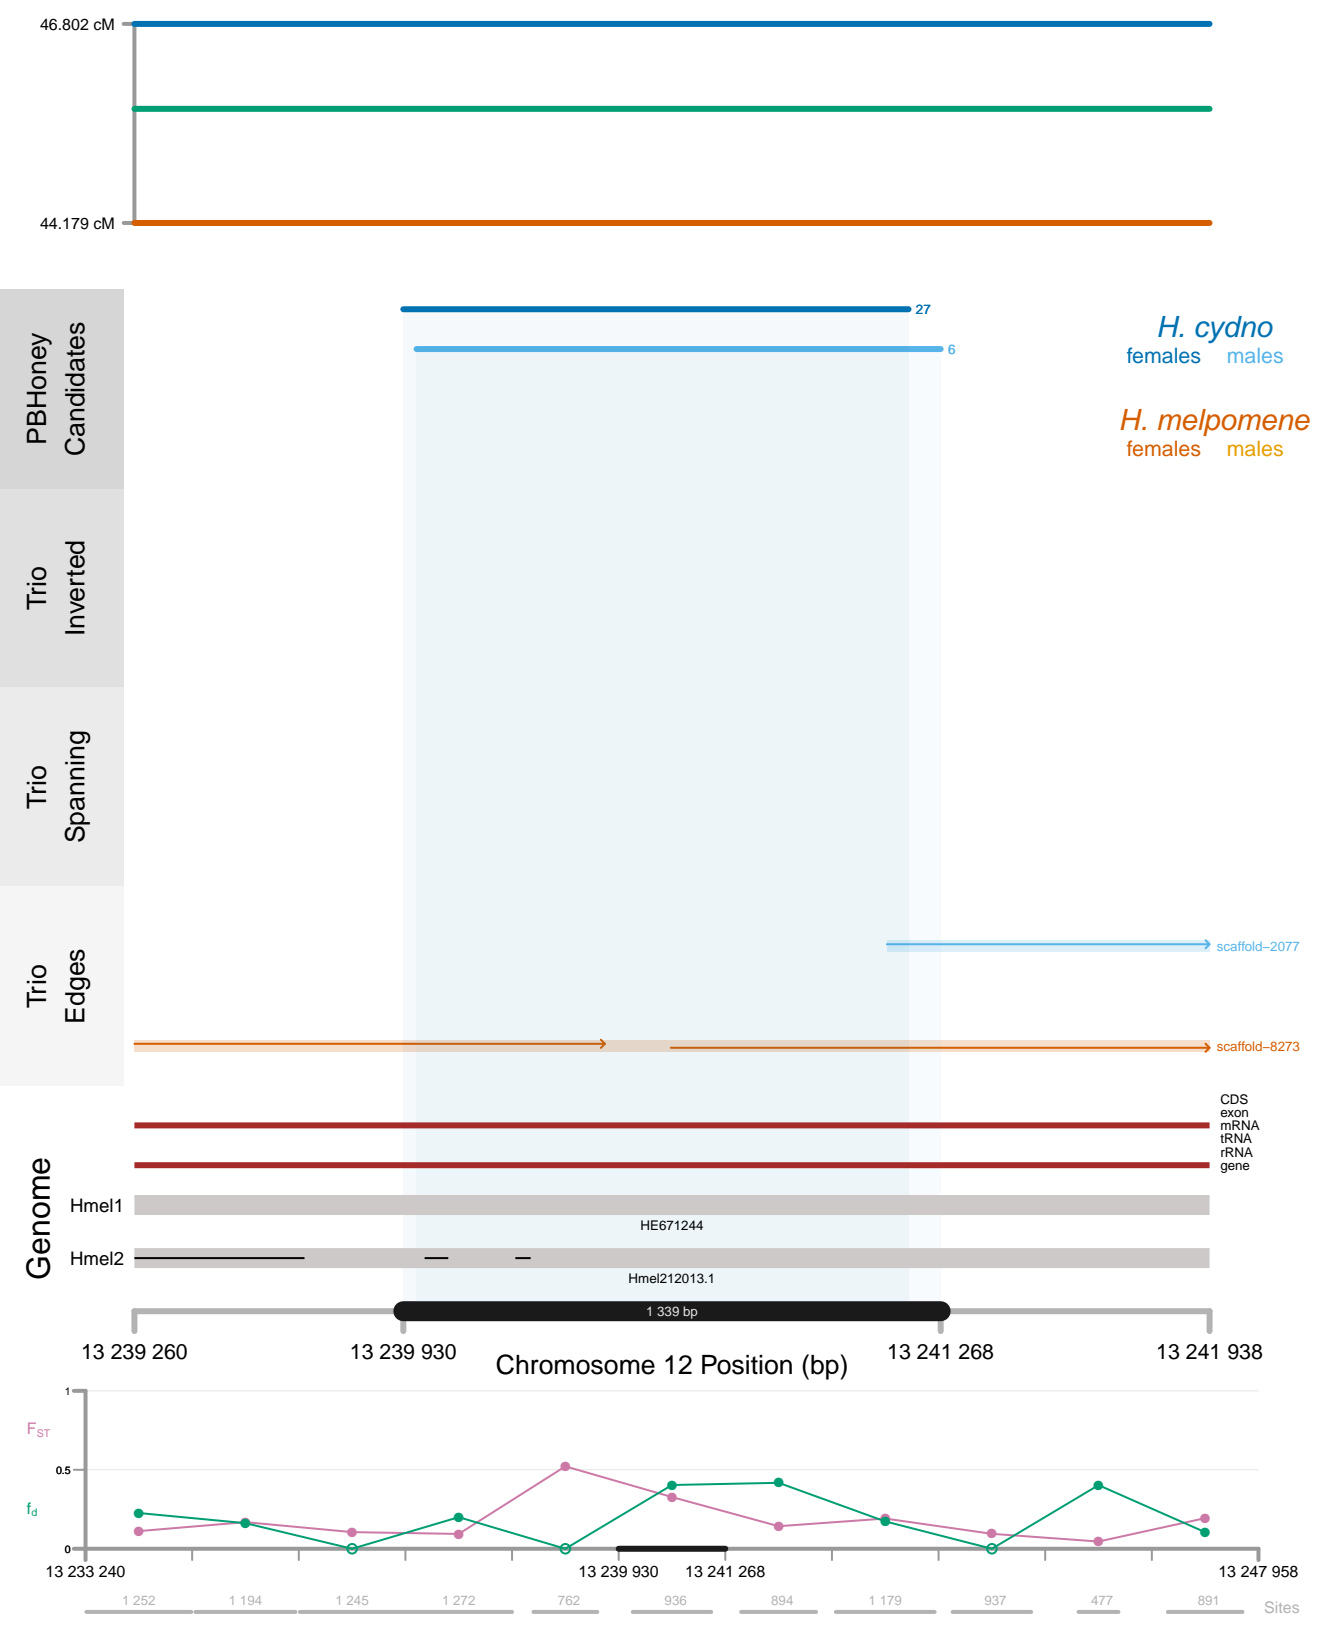

Figure S9.47

*H. cydno*

Split reads only

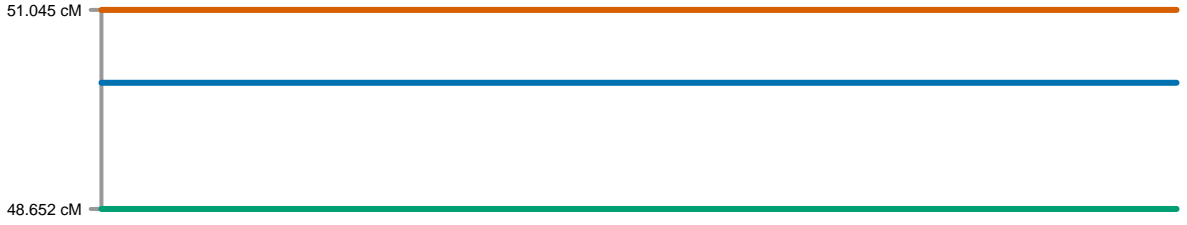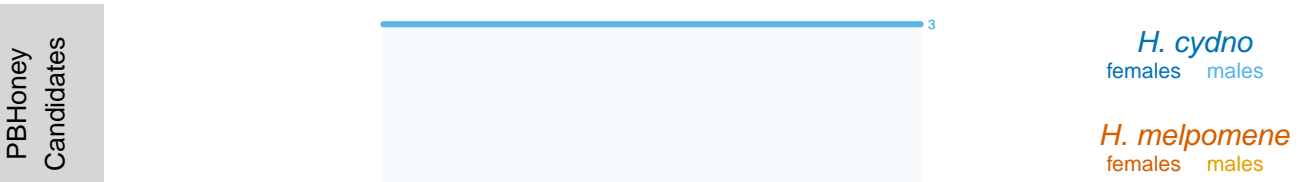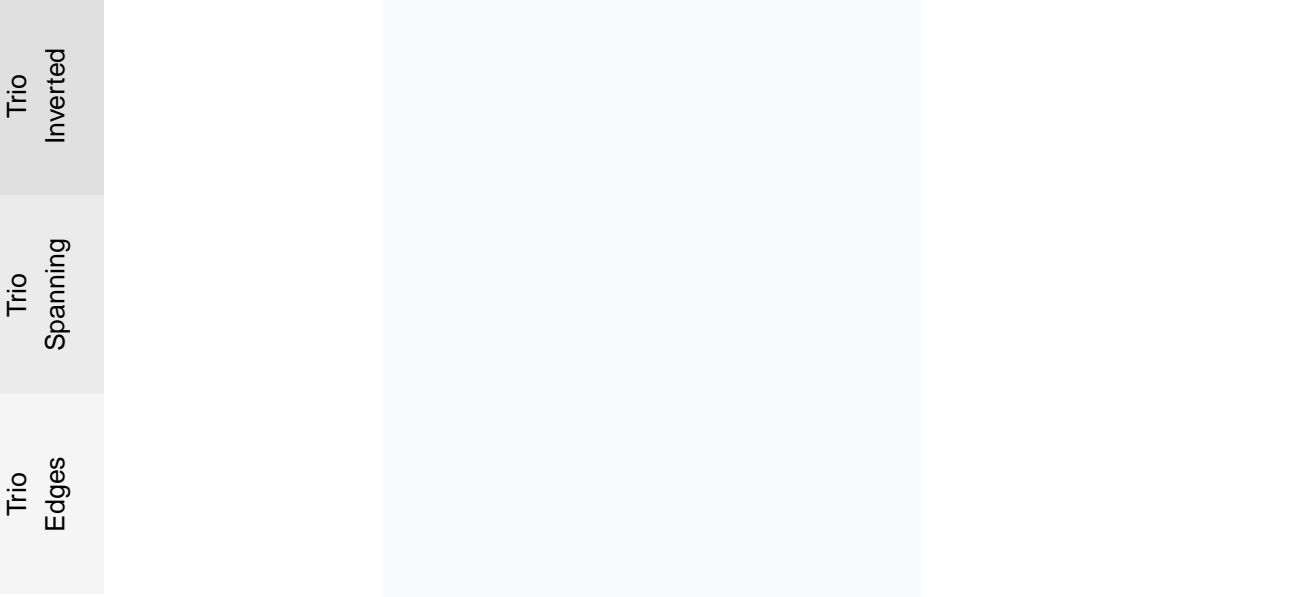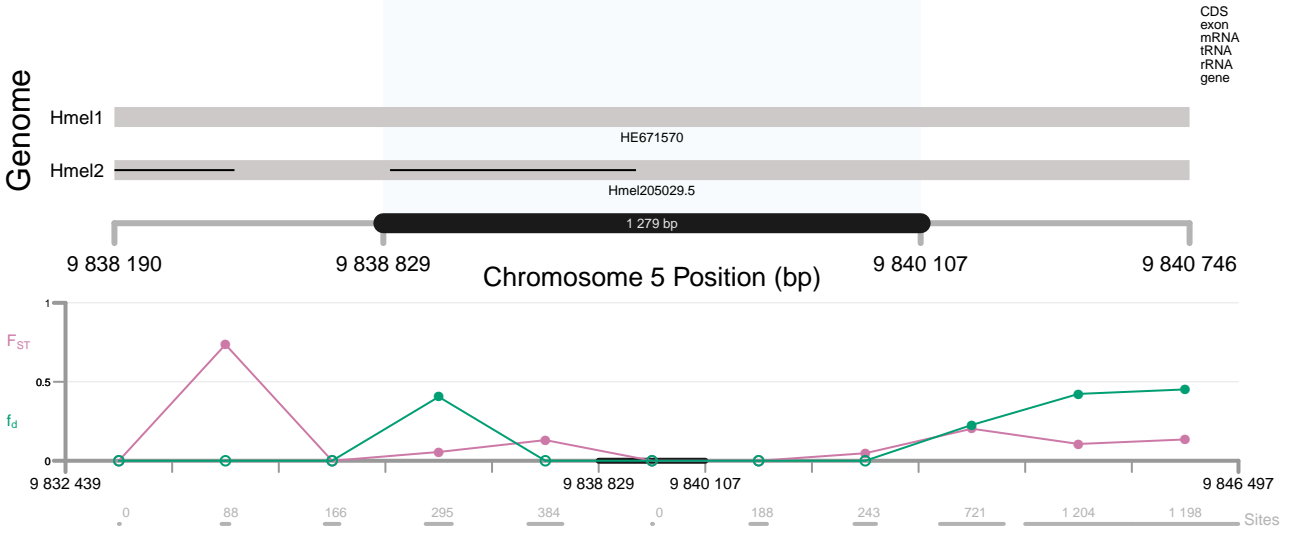

Figure S9.48

*H. cydno*

Split reads only

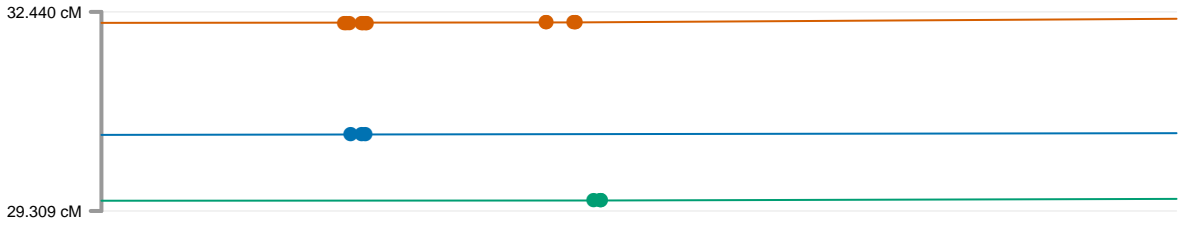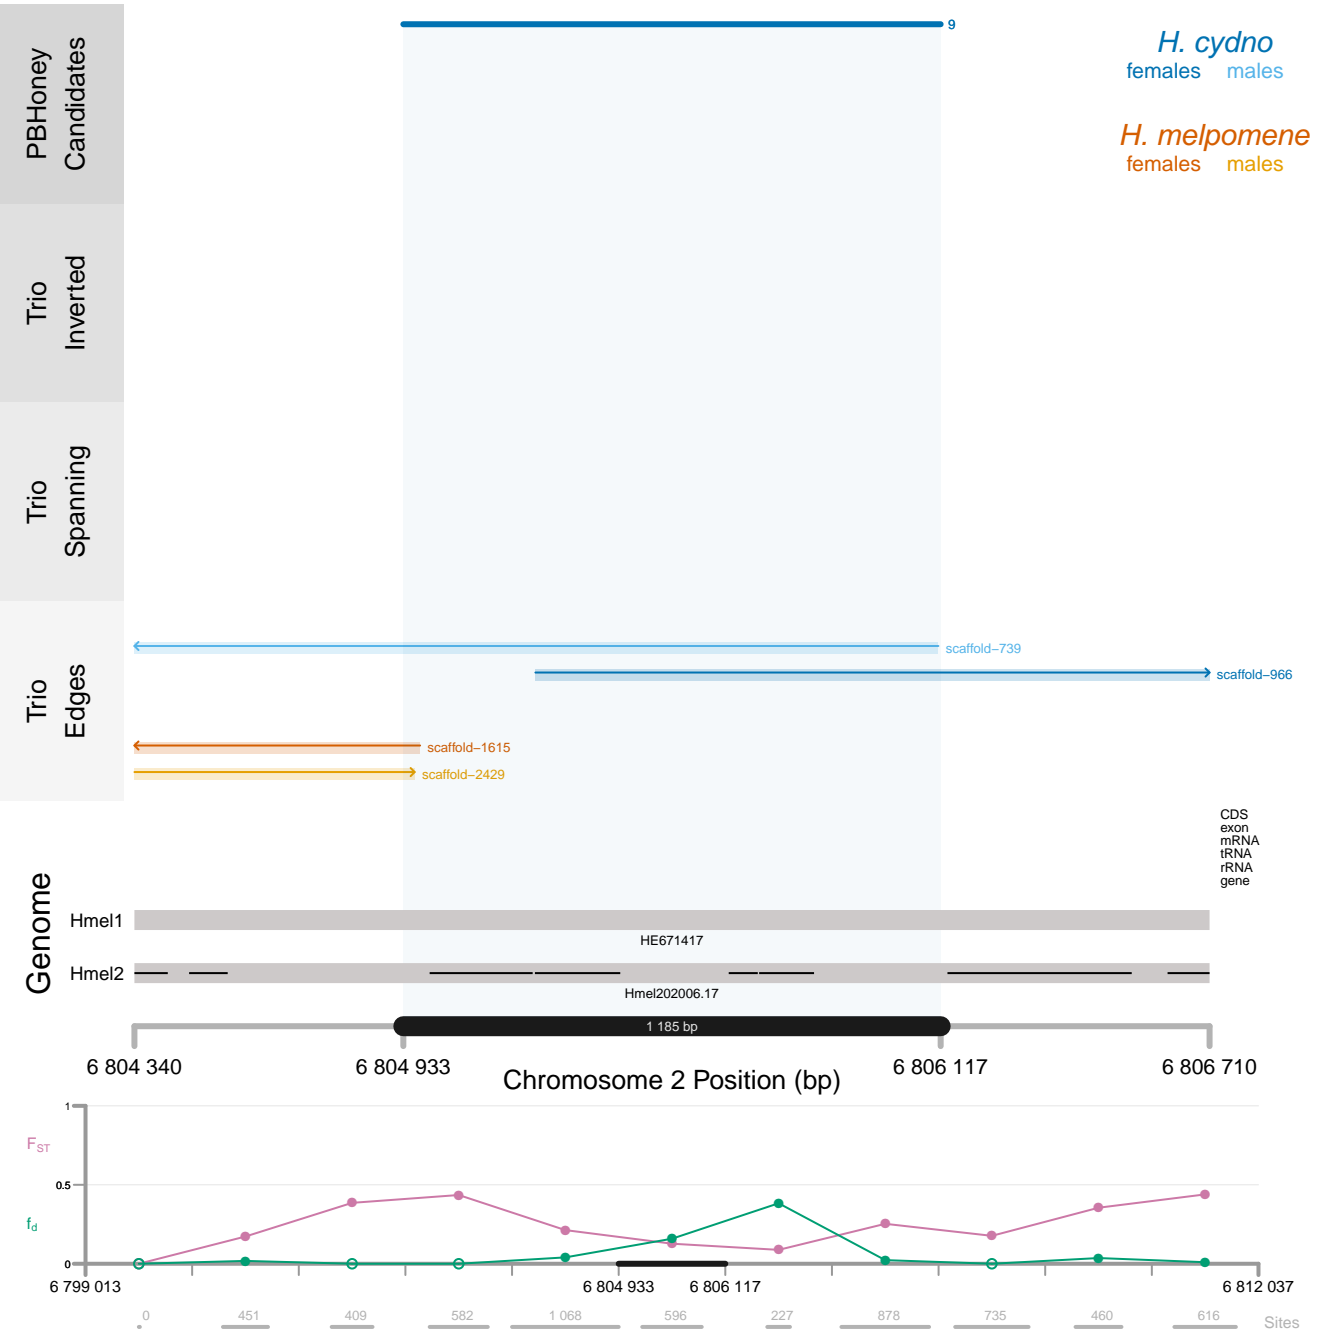



Figure S9.49

*H. cydno*

Split reads only

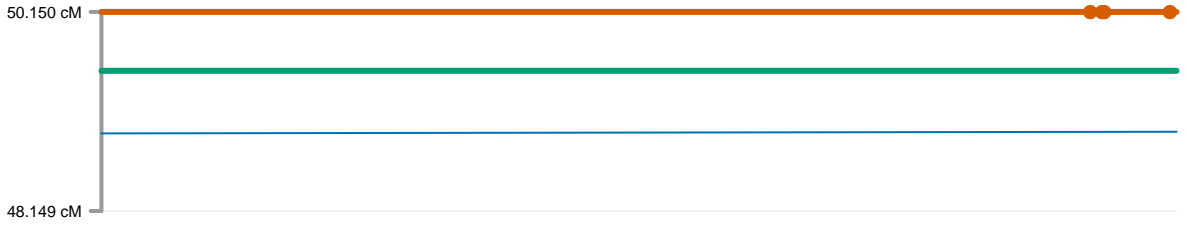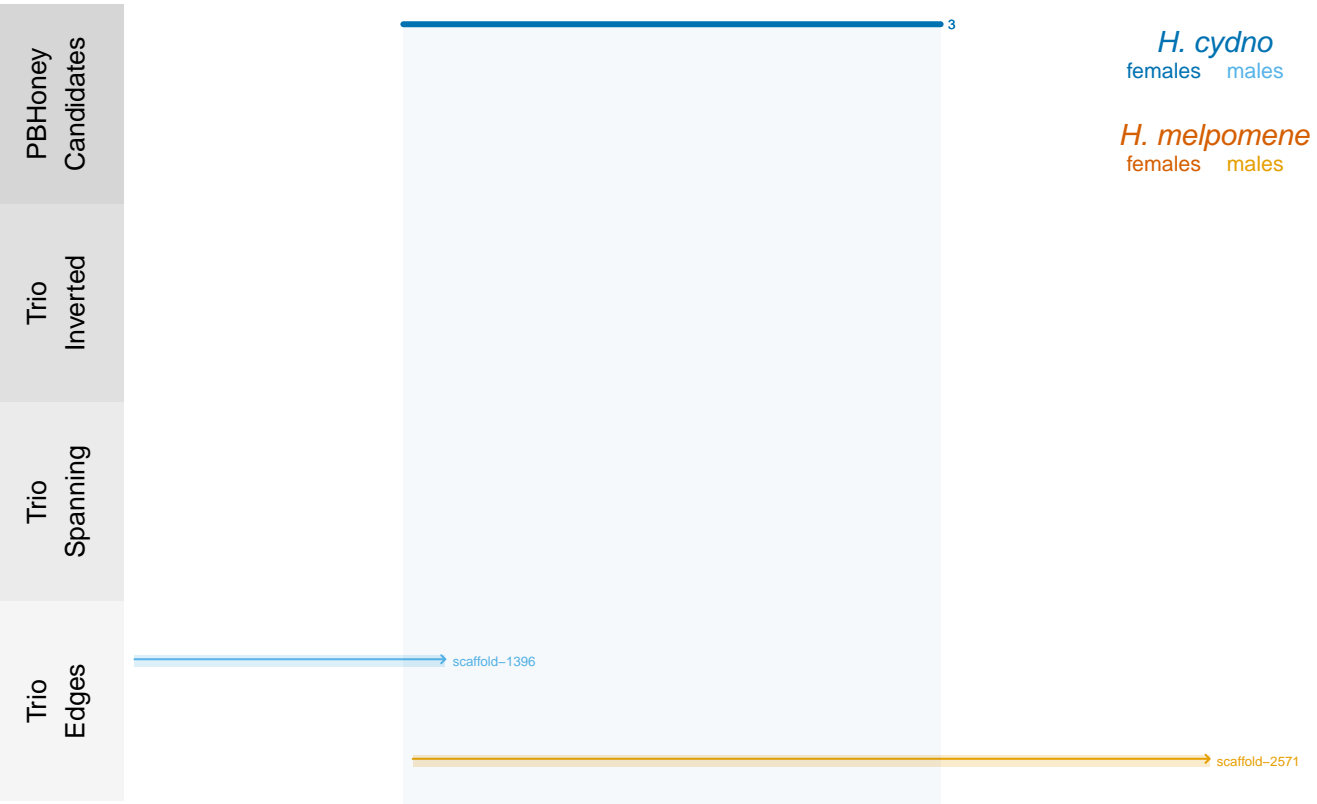

*H. cydno*  
females males

*H. melpomene*  
females males

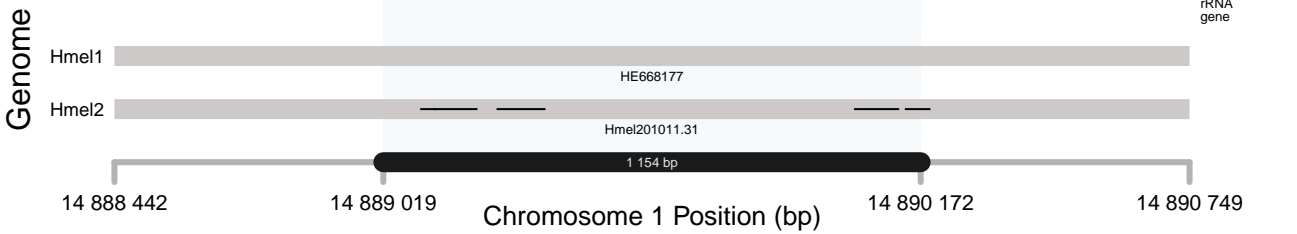

CDS  
exon  
mRNA  
tRNA  
rRNA  
gene

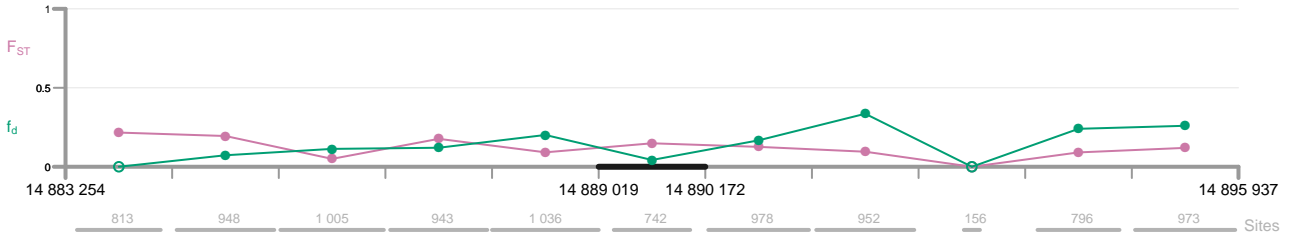

Sites

Figure S9.50

*H. cydno*

Split reads only

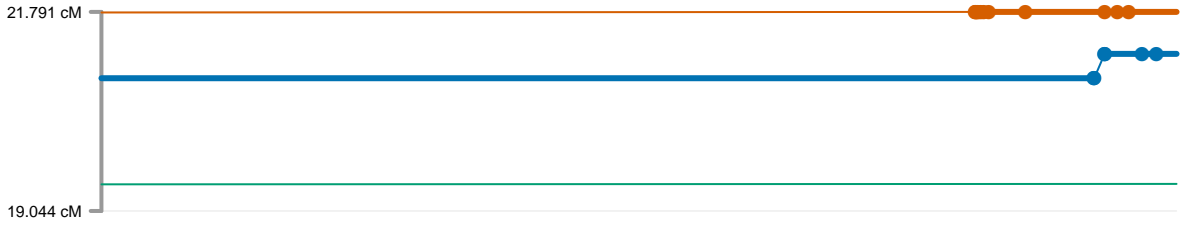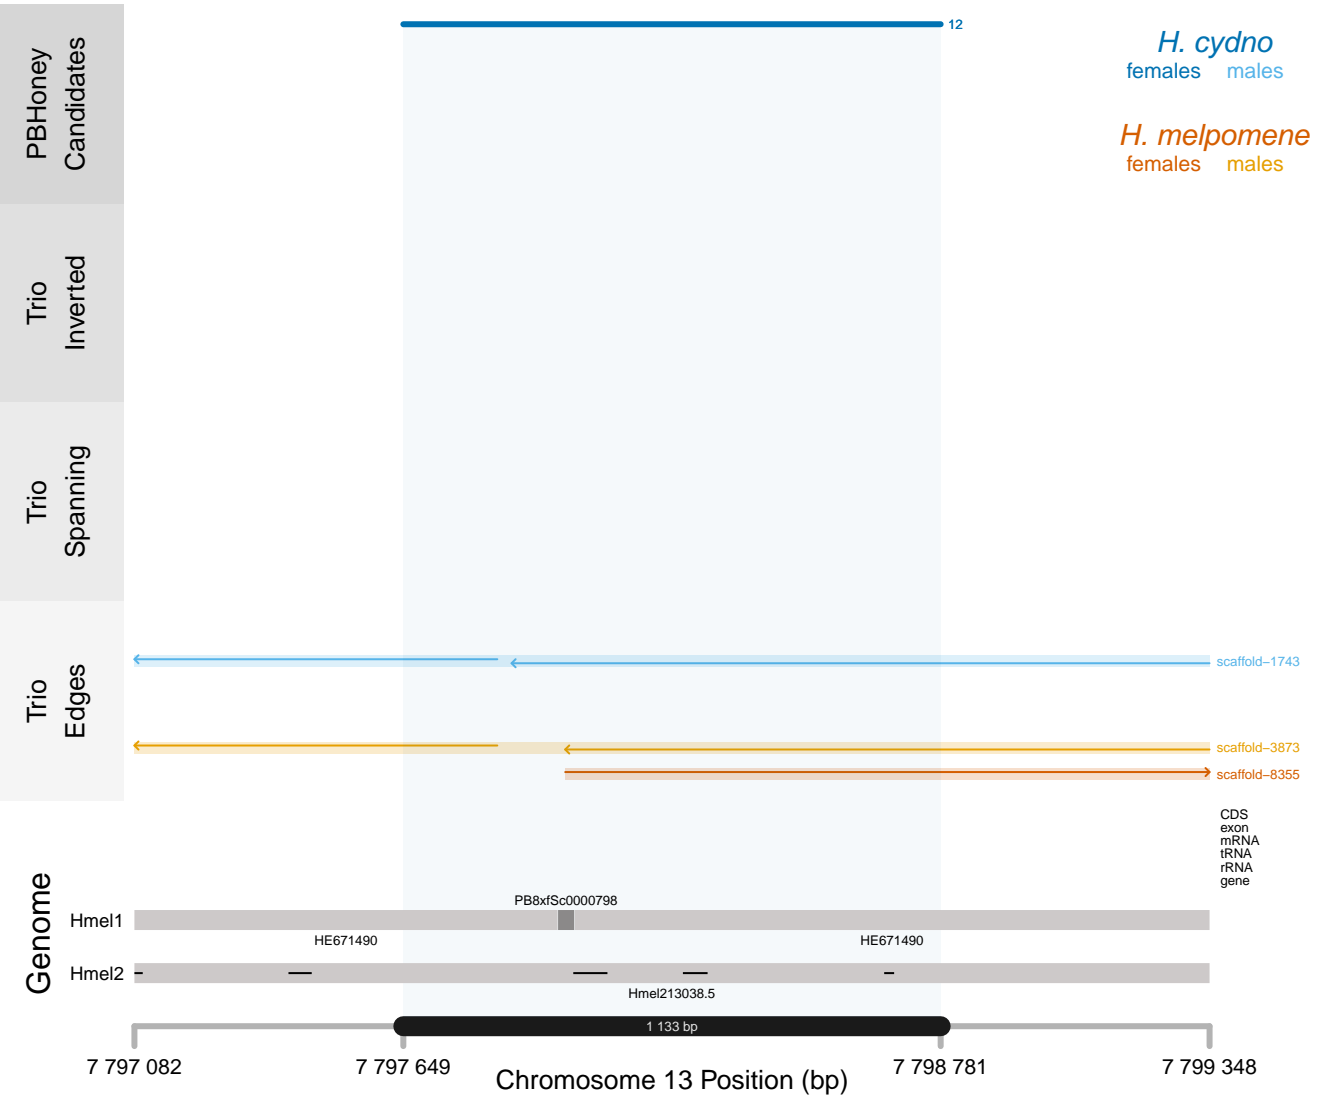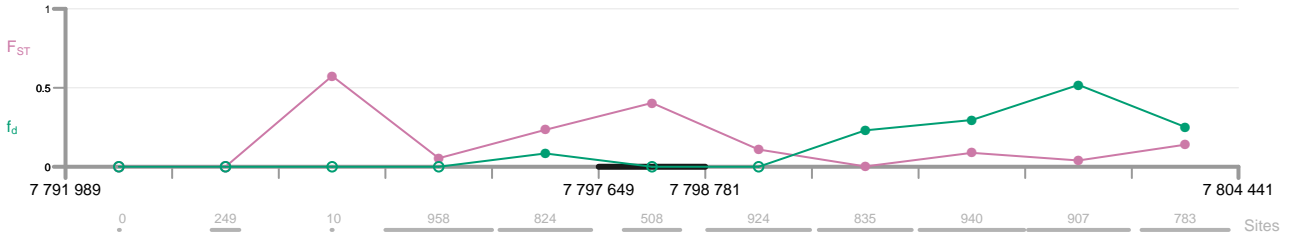

Figure S9.51

*H. cydno*

Split reads only

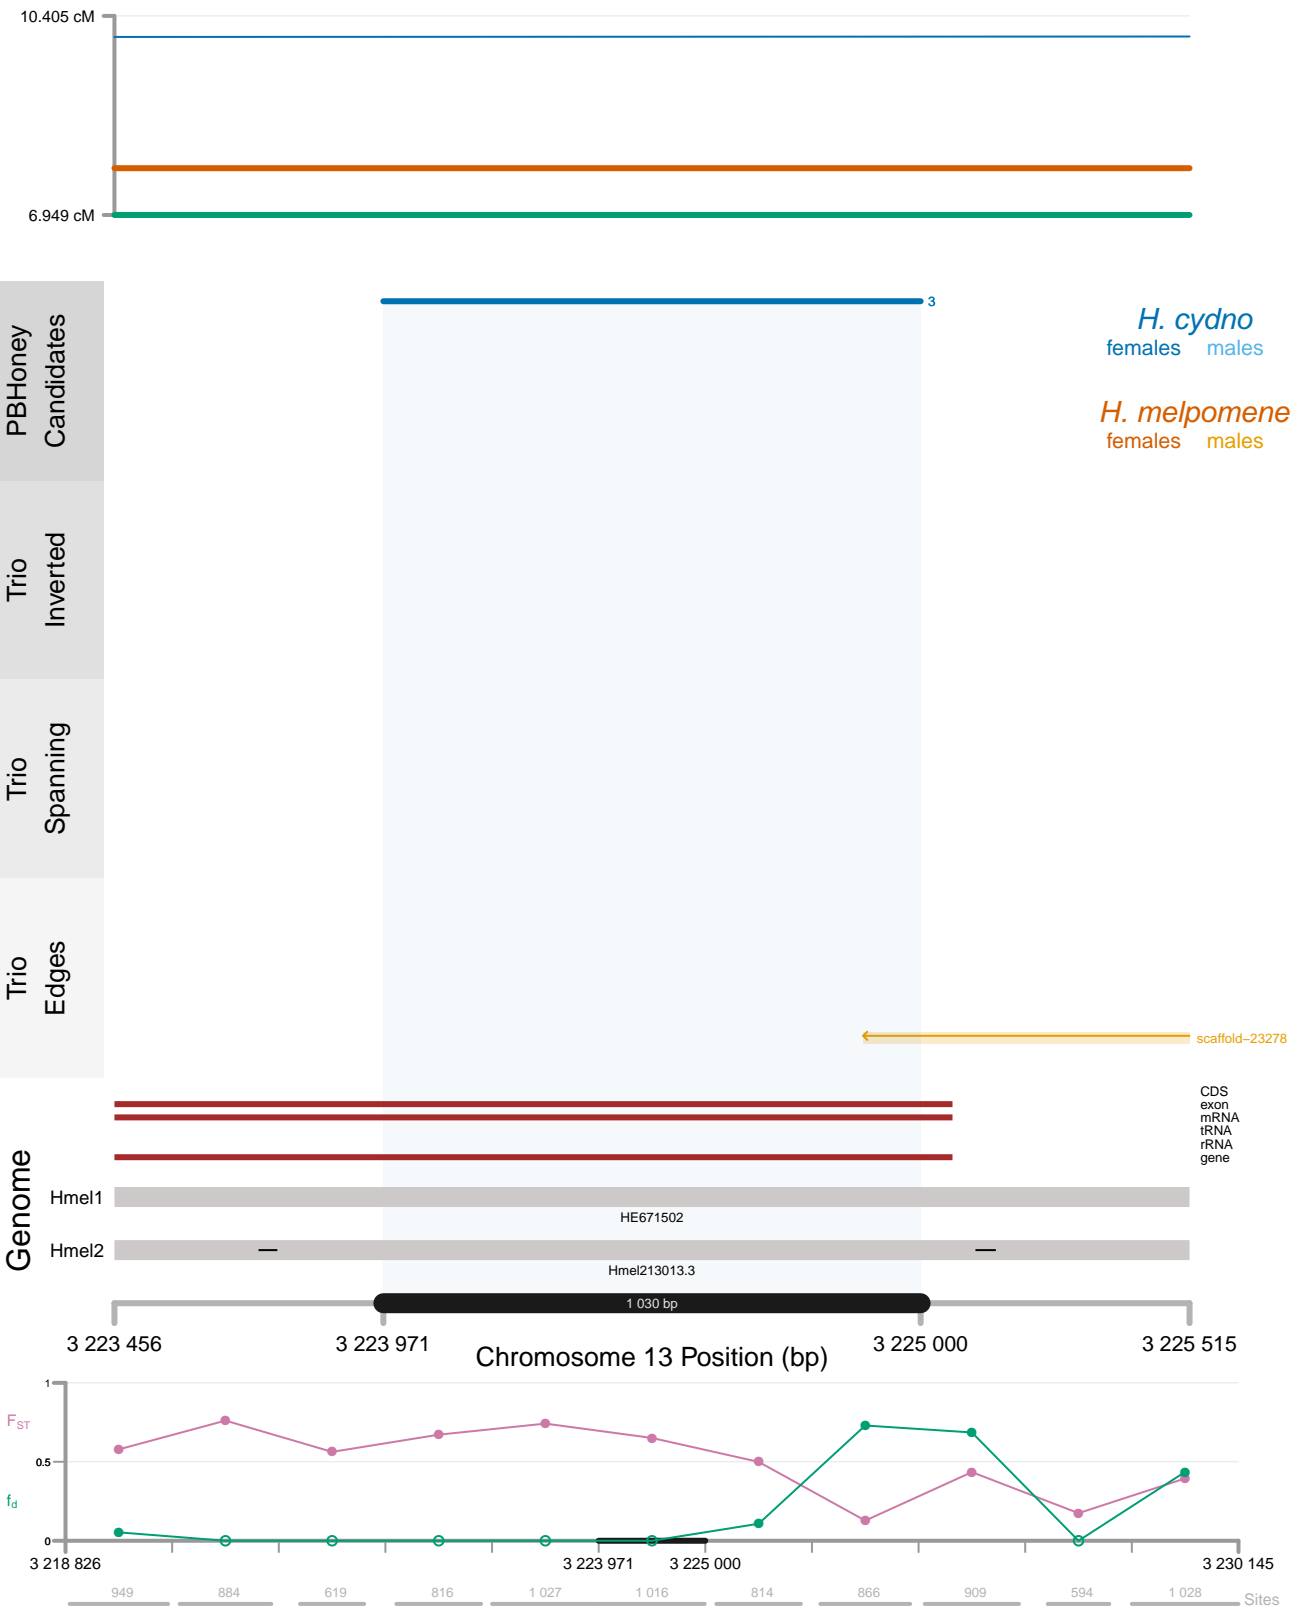

Figure S9.52

*H. cydno*

Split reads only

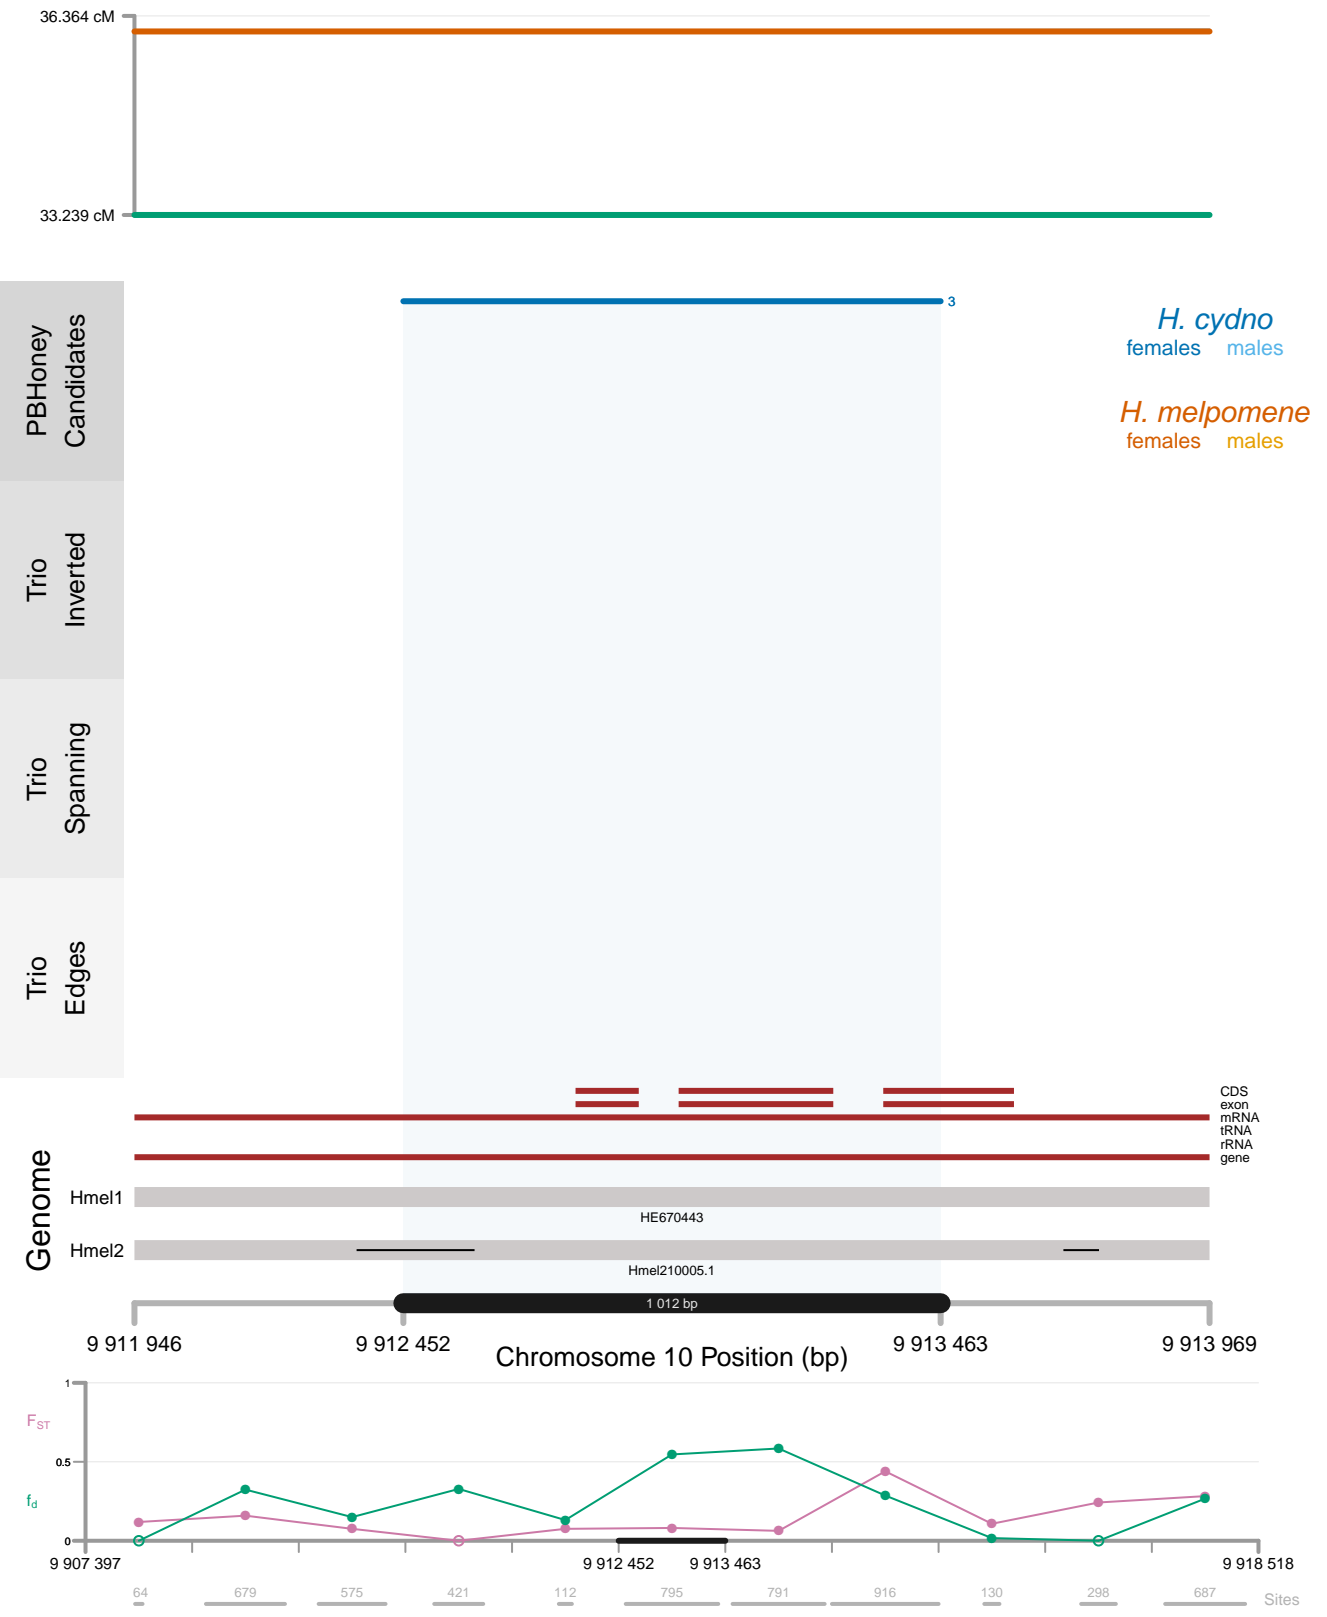

Supplement: Supplementary file [file 083931-9.pdf]
